# Supplementary material for: The Evolution of Life History Traits and Their Thermal Plasticity in Daphnia
Source: MDPI journal article supplement (doi:10.3390/hydrobiology2010005), 2023-01-06
Supplement: s1 [file s1]

**Table S1: Full citations for extracted meta-analysis data for *Daphnia* life history traits.**

| References                                                                                                                                                                                                                                                                                                                                                                                                                                                                                                                                                                                                                                                                                                                                                                                                                                                                                                                                                                                                                                                                                                                                                                                                                                                                                                                                                                                                                                                                                                                                                                                                                                                                                                                                                                                                                                                                                                                                                                                                                                                                                                                                                                                                                                                                                                                                                                                                                                                                                                                                                                                                                                                                                                                                                                                                                                                                                                                                                                                                                                                                                                                                                                                                                                                                                                                                                                                                                                                                                                                                                                                                                                                                                                                                                                                                                                                                                                                                                                                                                                                                                                                                                                                                                                                                                                                                                                                                                                                                                                                                                                                                                                                                                                                                                                                                                                                                                                                            |
|---------------------------------------------------------------------------------------------------------------------------------------------------------------------------------------------------------------------------------------------------------------------------------------------------------------------------------------------------------------------------------------------------------------------------------------------------------------------------------------------------------------------------------------------------------------------------------------------------------------------------------------------------------------------------------------------------------------------------------------------------------------------------------------------------------------------------------------------------------------------------------------------------------------------------------------------------------------------------------------------------------------------------------------------------------------------------------------------------------------------------------------------------------------------------------------------------------------------------------------------------------------------------------------------------------------------------------------------------------------------------------------------------------------------------------------------------------------------------------------------------------------------------------------------------------------------------------------------------------------------------------------------------------------------------------------------------------------------------------------------------------------------------------------------------------------------------------------------------------------------------------------------------------------------------------------------------------------------------------------------------------------------------------------------------------------------------------------------------------------------------------------------------------------------------------------------------------------------------------------------------------------------------------------------------------------------------------------------------------------------------------------------------------------------------------------------------------------------------------------------------------------------------------------------------------------------------------------------------------------------------------------------------------------------------------------------------------------------------------------------------------------------------------------------------------------------------------------------------------------------------------------------------------------------------------------------------------------------------------------------------------------------------------------------------------------------------------------------------------------------------------------------------------------------------------------------------------------------------------------------------------------------------------------------------------------------------------------------------------------------------------------------------------------------------------------------------------------------------------------------------------------------------------------------------------------------------------------------------------------------------------------------------------------------------------------------------------------------------------------------------------------------------------------------------------------------------------------------------------------------------------------------------------------------------------------------------------------------------------------------------------------------------------------------------------------------------------------------------------------------------------------------------------------------------------------------------------------------------------------------------------------------------------------------------------------------------------------------------------------------------------------------------------------------------------------------------------------------------------------------------------------------------------------------------------------------------------------------------------------------------------------------------------------------------------------------------------------------------------------------------------------------------------------------------------------------------------------------------------------------------------------------------------------------------------------|
| <ol style="list-style-type: none"><li>1. Abrusán, G. 2004. Filamentous cyanobacteria, temperature and <i>Daphnia</i> growth: the role of fluid mechanics. - <i>Oecologia</i> 141: 395-401.</li><li>2. Allan, J. D. 1977. An analysis of seasonal dynamics of a mixed population of <i>Daphnia</i>, and the associated cladoceran community. - <i>Freshwat Biol</i> 7: 505-512.</li><li>3. Antunes, S. C., Castro, B. B. and Gonçalves, F. 2003. Chronic responses of different clones of <i>Daphnia longispina</i> (field and ephippia) to different food levels. - <i>Acta Oecol</i> 24: S325-S332.</li><li>4. Ashforth, D. and Yan, N. D. 2008. The interactive effects of calcium concentration and temperature on the survival and reproduction of <i>Daphnia pulex</i> at high and low food concentrations. - <i>Limnol Oceanogr</i> 53: 420.</li><li>5. Bednarska, A., Joanna, Ł. and Dawidowicz, P. 2011. Temperature-dependent effect of filamentous cyanobacteria on <i>Daphnia magna</i> life history traits. - <i>Journal of Limnology</i> 70: 353-358.</li><li>6. Bernot, R. J., Dodds, W. K., Quist, M. C. and Guy, C. S. 2006. Temperature and kairomone induced life history plasticity in coexisting <i>Daphnia</i>. - <i>Aquat Ecol</i> 40: 361-372.</li><li>7. Burks, R. L., Jeppesen, E. and Lodge, D. M. 2000. Macrophyte and fish chemicals suppress <i>Daphnia</i> growth and alter life-history traits. - <i>Oikos</i> 88: 139-147.</li><li>8. Carvalho, G. 1987. The clonal ecology of <i>Daphnia magna</i> (Crustacea: Cladocera): II. Thermal differentiation among seasonal clones. - <i>The Journal of Animal Ecology</i> 469-478.</li><li>9. Castro, B. B., Consciência, S. and Gonçalves, F. 2007. Life history responses of <i>Daphnia longispina</i> to mosquitofish (<i>Gambusia holbrooki</i>) and pumpkinseed (<i>Lepomis gibbosus</i>) kairomones. - <i>Hydrobiologia</i> 594: 165-174.</li><li>10. Chen, C. Y. and Folt, C. L. 2002. Ecophysiological responses to warming events by two sympatric zooplankton species. - <i>J Plankton Res</i> 24: 579-589.</li><li>11. Claska, M. E. and Gilbert, J. J. 1998. The effect of temperature on the response of <i>Daphnia</i> to toxic cyanobacteria. - <i>Freshwat Biol</i> 39: 221-232.</li><li>12. Cole, P. C., Luecke, C., Wurtsbaugh, W. A. and Burkart, G. 2002. Growth and survival of <i>Daphnia</i> in epilimnetic and metalimnetic water from oligotrophic lakes: the effects of food and temperature. - <i>Freshwat Biol</i> 47: 2113-2122.</li><li>13. De Senerpont Domis, L., Bartosiewicz, M., Davis, C. and Cerbin, S. 2013. The effect of small doses of toxic cyanobacterial food on the temperature response of <i>Daphnia galeata</i>: is bigger better? - <i>Freshwat Biol</i> 58: 560-572.</li><li>14. Doksaeter, A. and Vijverberg, J. 2001. The effects of food and temperature regimes on life-history responses to fish kairomones in <i>Daphnia hyalina</i> × <i>galeata</i>*. - <i>Hydrobiologia</i> 442: 207-214.</li><li>15. Dufresne, F. and Hebert, P. D. 1998. Temperature-related differences in life-history characteristics between diploid and polyploid clones of the <i>Daphnia pulex</i> complex. - <i>Ecoscience</i> 433-437.</li><li>16. Dzialowski, A. R., Lennon, J. T., O'Brien, W. and Smith, V. H. 2003. Predator-induced phenotypic plasticity in the exotic cladoceran <i>Daphnia lumholtzi</i>. - <i>Freshwat Biol</i> 48: 1593-1602.</li><li>17. Giebelhausen, B. and Lampert, W. 2001. Temperature reaction norms of <i>Daphnia magna</i>: the effect of food concentration. - <i>Freshwat Biol</i> 46: 281-289.</li><li>18. Hall, C. J. and Burns, C. W. 2002. Mortality and growth responses of <i>Daphnia carinata</i> to increases in temperature and salinity. - <i>Freshwat Biol</i> 47: 451-458.</li><li>19. Hanazato, T. 1991. Effects of a <i>Chaoborus</i>-released chemical on <i>Daphnia ambigua</i>: Reduction in the tolerance of the <i>Daphnia</i> to summer water temperature. - <i>Limnol Oceanogr</i> 36: 165-171.</li><li>20. Hardy, E. and Duncan, A. 1994. Food concentration and temperature effects on life cycle characteristics of tropical Cladocera (<i>Daphnia gessneri</i> Herbst, <i>Diaphanosoma sarsi</i> Richard, <i>Moina reticulata</i> (Daday)): I. Development time. - <i>Acta Amazon</i> 24: 119-134.</li><li>21. Heckmann, L., Callaghan, A., Hooper, H. L., et al. 2007. Chronic toxicity of ibuprofen to <i>Daphnia magna</i>: effects on life history traits and population dynamics. - <i>Toxicol Lett</i> 172: 137-145.</li><li>22. Heugens, E. H., Tokkie, L. T., Kraak, M. H., Hendriks, A. J., van Straalen, N. M. and Admiraal, W. 2006. Population growth of <i>Daphnia magna</i> under multiple stress conditions: joint effects of temperature, food, and cadmium. - <i>Environmental Toxicology and Chemistry</i> 25: 1399-1407.</li></ol> |

- 
23. Hietala, J., Laurén-Määttä, C. and Walls, M. 1997. Life history responses of *Daphnia* clones to toxic *Microcystis* at different food levels. - J Plankton Res 19: 917-926.
  24. Hietala, J., Lauren-Maata, C. and Walls, M. 1997. Sensitivity of *Daphnia* to toxic cyanobacteria: effects of genotype and temperature. - Freshwat Biol 37: 299-306.
  25. Jalal, M., Wojewodziec, M. W., Laane, C. M. M., Hessen, D. O. and Bainard, J. 2013. Larger *Daphnia* at lower temperature: a role for cell size and genome configuration? 1. - Genome 56: 511-519.
  26. Kessler, K. and Lampert, W. 2004. Fitness optimization of *Daphnia* in a trade-off between food and temperature. - Oecologia 140: 381-387.
  27. Korpelainen, H. 1986. The effects of temperature and photoperiod on life history parameters of *Daphnia magna* (Crustacea: Cladocera). - Freshwat Biol 16: 615-620.
  28. LaBerge, S. and Hann, B. 1990. Acute temperature and oxygen stress among genotypes of *Daphnia pulex* and *Simocephalus vetulus* (Cladocera, Daphniidae) in relation to environmental conditions. - Can J Zool 68: 2257-2263.
  29. Lass, S. and Spaak, P. 2003. Temperature effects on chemical signalling in a predator-prey system. - Freshwat Biol 48: 669-677.
  30. Lennon, J. T., Smith, V. H. and Williams, K. 2001. Influence of temperature on exotic *Daphnia lumholtzi* and implications for invasion success. - J Plankton Res 23: 425-433.
  31. Lüning, J. 1992. Phenotypic plasticity of *Daphnia pulex* in the presence of invertebrate predators: morphological and life history responses. - Oecologia 92: 383-390.
  32. Lüring, M., Roozen, F., Van Donk, E. and Goser, B. 2003. Response of *Daphnia* to substances released from crowded congeners and conspecifics. - J Plankton Res 25: 967-978.
  33. Masclaux, H., Bec, A., Kainz, M. J., Desvillettes, C., Jouve, L. and Bourdier, G. 2009. Combined effects of food quality and temperature on somatic growth and reproduction of two freshwater cladocerans. - Limnol Oceanogr 54: 1323-1332.
  34. McFeeters, B. J. and Frost, P. C. 2011. Temperature and the effects of elemental food quality on *Daphnia*. - Freshwat Biol 56: 1447-1455.
  35. Mitchell, S., Halves, J. and Lampert, W. 2004. Coexistence of similar genotypes of *Daphnia magna* in intermittent populations: response to thermal stress. - Oikos 106: 469-478.
  36. Mitchell, S. and Lampert, W. 2000. Temperature adaptation in a geographically widespread zooplankton, *Daphnia magna*. - J Evol Biol 13: 371-382.
  37. Muysen, B. T., Messiaen, M. and Janssen, C. R. 2010. Combined cadmium and temperature acclimation in *Daphnia magna*: physiological and sub-cellular effects. - Ecotoxicol Environ Saf 73: 735-742.
  38. Naddy, R. B., Johnson, K. A. and Klaine, S. J. 2000. Response of *Daphnia magna* to pulsed exposures of chlorpyrifos. - Environmental toxicology and chemistry 19: 423-431.
  39. Nandini, S. 2000. Responses of rotifers and cladocerans to *Microcystis aeruginosa* (Cyanophyceae): a demographic study. - Aquat Ecol 34: 227-242.
  40. Neill, W. E. 1981. Developmental responses of juvenile *Daphnia rosea* to experimental alteration of temperature and natural seston concentration. - Can J Fish Aquat Sci 38: 1357-1362.
  41. Orcutt Jr, J. D. and Porter, K. G. 1984. The synergistic effects of temperature and food concentration on life history parameters of *Daphnia*. - Oecologia 63: 300-306.
  42. Orcutt, J. D. and Porter, K. G. 1983. Diel vertical migration by zooplankton: constant and fluctuating temperature effects on life history parameters of *Daphnia*. - Limnol Oceanogr 28: 720-730.
  43. Pattinson, K., Havel, J. and Rhodes, R. 2003. Invasibility of a reservoir to exotic *Daphnia lumholtzi*: experimental assessment of diet selection and life history responses to cyanobacteria. - Freshwat Biol 48: 233-246.
  44. Pijanowska, J. and Kloc, M. 2004. *Daphnia* response to predation threat involves heat-shock proteins and the actin and tubulin cytoskeleton. - Genesis 38: 81-86.
  45. Repka, S. 1997. Effects of food type on the life history of *Daphnia* clones from lakes differing in trophic state. II. *Daphnia cucullata* feeding on mixed diets\*. - Freshwat Biol 38: 685-692.
  46. Sakwińska, O. 1998. Plasticity of *Daphnia magna* life history traits in response to temperature and information about a predator. - Freshwat Biol 39: 681-687.
  47. Scheiner, S. M. and Berrigan, D. 1998. The genetics of phenotypic plasticity. VIII. The cost of plasticity in *Daphnia pulex*. - Evolution 368-378.
-

- 
48. Scheiner, S. M. and Yampolsky, L. Y. 1998. The evolution of *Daphnia pulex* in a temporally varying environment. - Genet Res 72: 25-37.
  49. Seidl, M., Pirow, R. and Paul, R. 2005. Acclimation of the microcrustacean *Daphnia magna* to warm temperatures is dependent on haemoglobin expression. - J Therm Biol 30: 532-544.
  50. Shaw, J. R., Colbourne, J. K., Davey, J. C., et al. 2007. Gene response profiles for *Daphnia pulex* exposed to the environmental stressor cadmium reveals novel crustacean metallothioneins. - BMC Genomics 8: 1.
  51. Simčič, T. and Brancelj, A. 1997. Electron transport system (ETS) activity and respiration rate in five *Daphnia* species at different temperatures. - Springer.
  52. Sperfeld, E. and Wacker, A. 2012. Temperature affects the limitation of *Daphnia magna* by eicosapentaenoic acid, and the fatty acid composition of body tissue and eggs. - Freshwat Biol 57: 497-508.
  53. Sperfeld, E. and Wacker, A. 2011. Temperature-and cholesterol-induced changes in eicosapentaenoic acid limitation of *Daphnia magna* determined by a promising method to estimate growth saturation thresholds. - Limnol Oceanogr 56: 1273-1284.
  54. Stich, H. and Lampert, W. 1984. Growth and reproduction of migrating and non-migrating *Daphnia* species under simulated food and temperature conditions of diurnal vertical migration. - Oecologia 61: 192-196.
  55. Van Doorslaer, W., Stoks, R., Duvivier, C., Bednarska, A. and De Meester, L. 2009. Population dynamics determine genetic adaptation to temperature in *Daphnia*. - Evolution 63: 1867-1878.
  56. Van Doorslaer, W., Stoks, R., Swillen, I., et al. 2010. Experimental thermal microevolution in community-embedded *Daphnia* populations. - Climate research (Open Access for articles 4 years old and older) 43: 81.
  57. Van Doorslaer, W., Vanoverbeke, J., Duvivier, C., et al. 2009. Local adaptation to higher temperatures reduces immigration success of genotypes from a warmer region in the water flea *Daphnia*. - Global Change Biol 15: 3046-3055.
  58. Walls, M. and Ventelä, A. 1998. Life history variability in response to temperature and Chaoborus exposure in three *Daphnia pulex* clones. - Can J Fish Aquat Sci 55: 1961-1970.
  59. Weber, A. and Declerck, S. 1997. Phenotypic plasticity of *Daphnia* life history traits in response to predator kairomones: genetic variability and evolutionary potential. - Hydrobiologia 360: 89-99.
  60. Weers, P. M. and Gulati, R. D. 1997. Growth and reproduction of *Daphnia galeata* in response to changes in fatty acids, phosphorus, and nitrogen in *Chlamydomonas reinhardtii*. - Limnol Oceanogr 42: 1584-1589.
  61. Weetman, D. and Atkinson, D. 2004. Evaluation of alternative hypotheses to explain temperature-induced life history shifts in *Daphnia*. - J Plankton Res 26: 107-116.
  62. Weetman, D. and Atkinson, D. 2002. Antipredator reaction norms for life history traits in *Daphnia pulex*: dependence on temperature and food. - Oikos 98: 299-307.
  63. Weider, L. J. 1993. Niche breadth and life history variation in a hybrid *Daphnia* complex. - Ecology 935-943.
  64. Williamson, C. E., Grad, G., De Lange, H. J., Gilroy, S. and Karapelou, D. M. 2002. Temperature-dependent ultraviolet responses in zooplankton: Implications of climate change. - Limnol Oceanogr 47: 1844-1848.
  65. Winner, R. W. and Whitford, T. C. 1987. The interactive effects of a cadmium stress, a selenium deficiency and water temperature on the survival and reproduction of *Daphnia magna* Straus. - Aquatic toxicology 10: 217-224.
  66. Work, K. A. and Gophen, M. 1999. Factors which affect the abundance of an invasive cladoceran, *Daphnia lumholtzi*, in US reservoirs. - Freshwat Biol 42: 1-10.
-

**Table S2: GenBank accession numbers for sequences used to generate six-loci molecular phylogeny for *Daphnia*.**

| <b>Genus</b>   | <b>Species</b>  | <b>28s</b> | <b>18s</b> | <b>5.8s</b> | <b>12s</b> | <b>COI</b> | <b>ND2</b> |
|----------------|-----------------|------------|------------|-------------|------------|------------|------------|
| <i>Daphnia</i> | <i>ambigua</i>  | NA         | AF277283   | NA          | AF277283   | AF523692   | DQ132621   |
| <i>Daphnia</i> | <i>ambigua</i>  | NA         | AF064175   | NA          | AF064175   | AF523691   | DQ845276   |
| <i>Daphnia</i> | <i>ambigua</i>  | NA         | AY626360   | NA          | AY626360   | AF523685   | NA         |
| <i>Daphnia</i> | <i>ambigua</i>  | NA         | AF523721   | NA          | AF523721   | AF523688   | NA         |
| <i>Daphnia</i> | <i>ambigua</i>  | NA         | AF523722   | NA          | AF523722   | AF523706   | NA         |
| <i>Daphnia</i> | <i>ambigua</i>  | NA         | AF523733   | NA          | AF523733   | AF523689   | NA         |
| <i>Daphnia</i> | <i>ambigua</i>  | NA         | AF523732   | NA          | AF523732   | AF523712   | NA         |
| <i>Daphnia</i> | <i>ambigua</i>  | NA         | AF523714   | NA          | AF523714   | AF523713   | NA         |
| <i>Daphnia</i> | <i>ambigua</i>  | NA         | AF523724   | NA          | AF523724   | AF523690   | NA         |
| <i>Daphnia</i> | <i>ambigua</i>  | NA         | AF523730   | NA          | AF523730   | AF523695   | NA         |
| <i>Daphnia</i> | <i>ambigua</i>  | NA         | AF523723   | NA          | AF523723   | AF523698   | NA         |
| <i>Daphnia</i> | <i>ambigua</i>  | NA         | AF523718   | NA          | AF523718   | AF523694   | NA         |
| <i>Daphnia</i> | <i>ambigua</i>  | NA         | AF523726   | NA          | AF523726   | AF523704   | NA         |
| <i>Daphnia</i> | <i>ambigua</i>  | NA         | AF523736   | NA          | AF523736   | AF523701   | NA         |
| <i>Daphnia</i> | <i>ambigua</i>  | NA         | AF523731   | NA          | AF523731   | AF523703   | NA         |
| <i>Daphnia</i> | <i>ambigua</i>  | NA         | AF523738   | NA          | AF523738   | AF523705   | NA         |
| <i>Daphnia</i> | <i>ambigua</i>  | NA         | KY196426   | NA          | KY196426   | AF523702   | NA         |
| <i>Daphnia</i> | <i>ambigua</i>  | NA         | AF523727   | NA          | AF523727   | AF523699   | NA         |
| <i>Daphnia</i> | <i>ambigua</i>  | NA         | AF523720   | NA          | AF523720   | AF523709   | NA         |
| <i>Daphnia</i> | <i>ambigua</i>  | NA         | AF523735   | NA          | AF523735   | AF523697   | NA         |
| <i>Daphnia</i> | <i>ambigua</i>  | NA         | AF523716   | NA          | AF523716   | AF523700   | NA         |
| <i>Daphnia</i> | <i>ambigua</i>  | NA         | AF523725   | NA          | AF523725   | AF523687   | NA         |
| <i>Daphnia</i> | <i>ambigua</i>  | NA         | AF523729   | NA          | AF523729   | AF523686   | NA         |
| <i>Daphnia</i> | <i>ambigua</i>  | NA         | AF523737   | NA          | AF523737   | AF523710   | NA         |
| <i>Daphnia</i> | <i>ambigua</i>  | NA         | AF523719   | NA          | AF523719   | AF523696   | NA         |
| <i>Daphnia</i> | <i>ambigua</i>  | NA         | AF523728   | NA          | AF523728   | AF523684   | NA         |
| <i>Daphnia</i> | <i>ambigua</i>  | NA         | AF523715   | NA          | AF523715   | AF523707   | NA         |
| <i>Daphnia</i> | <i>ambigua</i>  | NA         | AF523717   | NA          | AF523717   | AF523693   | NA         |
| <i>Daphnia</i> | <i>ambigua</i>  | NA         | AF523734   | NA          | AF523734   | AF523708   | NA         |
| <i>Daphnia</i> | <i>ambigua</i>  | NA         | NA         | NA          | NA         | AF523711   | NA         |
| <i>Daphnia</i> | <i>ambigua</i>  | NA         | NA         | NA          | NA         | LC215464   | NA         |
| <i>Daphnia</i> | <i>ambigua</i>  | NA         | NA         | NA          | NA         | LC215465   | NA         |
| <i>Daphnia</i> | <i>ambigua</i>  | NA         | NA         | NA          | NA         | KC616919   | NA         |
| <i>Daphnia</i> | <i>ambigua</i>  | NA         | NA         | NA          | NA         | KC616921   | NA         |
| <i>Daphnia</i> | <i>ambigua</i>  | NA         | NA         | NA          | NA         | KC616920   | NA         |
| <i>Daphnia</i> | <i>ambigua</i>  | NA         | NA         | NA          | NA         | KC616916   | NA         |
| <i>Daphnia</i> | <i>ambigua</i>  | NA         | NA         | NA          | NA         | MF742957   | NA         |
| <i>Daphnia</i> | <i>ambigua</i>  | NA         | NA         | NA          | NA         | MF746232   | NA         |
| <i>Daphnia</i> | <i>ambigua</i>  | NA         | NA         | NA          | NA         | MF744361   | NA         |
| <i>Daphnia</i> | <i>ambigua</i>  | NA         | NA         | NA          | NA         | MF748599   | NA         |
| <b>Genus</b>   | <b>Species</b>  | <b>28s</b> | <b>18s</b> | <b>5.8s</b> | <b>12s</b> | <b>COI</b> | <b>ND2</b> |
| <i>Daphnia</i> | <i>ambigua</i>  | NA         | NA         | NA          | NA         | MG448989   | NA         |
| <i>Daphnia</i> | <i>ambigua</i>  | NA         | NA         | NA          | NA         | KC616918   | NA         |
| <i>Daphnia</i> | <i>ambigua</i>  | NA         | NA         | NA          | NA         | KC617596   | NA         |
| <i>Daphnia</i> | <i>ambigua</i>  | NA         | NA         | NA          | NA         | KC617595   | NA         |
| <i>Daphnia</i> | <i>ambigua</i>  | NA         | NA         | NA          | NA         | KC617599   | NA         |
| <i>Daphnia</i> | <i>ambigua</i>  | NA         | NA         | NA          | NA         | KC617600   | NA         |
| <i>Daphnia</i> | <i>ambigua</i>  | NA         | NA         | NA          | NA         | KC617598   | NA         |
| <i>Daphnia</i> | <i>ambigua</i>  | NA         | NA         | NA          | NA         | KC617594   | NA         |
| <i>Daphnia</i> | <i>ambigua</i>  | NA         | NA         | NA          | NA         | KC617597   | NA         |
| <i>Daphnia</i> | <i>ambigua</i>  | NA         | NA         | NA          | NA         | KC617313   | NA         |
| <i>Daphnia</i> | <i>ambigua</i>  | NA         | NA         | NA          | NA         | KC617314   | NA         |
| <i>Daphnia</i> | <i>ambigua</i>  | NA         | NA         | NA          | NA         | KC616917   | NA         |
| <i>Daphnia</i> | <i>carinata</i> | NA         | AF217140   | NA          | AF217140   | KC154294   | NA         |
| <i>Daphnia</i> | <i>carinata</i> | NA         | AY921461   | NA          | AY921461   | KC154295   | NA         |
| <i>Daphnia</i> | <i>carinata</i> | NA         | NC_028152  | NA          | NA         | KC154296   | NA         |
| <i>Daphnia</i> | <i>carinata</i> | NA         | KP721459   | NA          | NA         | KC154297   | NA         |
| <i>Daphnia</i> | <i>carinata</i> | NA         | NA         | NA          | NA         | KC154298   | NA         |
| <i>Daphnia</i> | <i>carinata</i> | NA         | NA         | NA          | NA         | MG988427   | NA         |
| <i>Daphnia</i> | <i>carinata</i> | NA         | NA         | NA          | NA         | JF821189   | NA         |
| <i>Daphnia</i> | <i>carinata</i> | NA         | NA         | NA          | NA         | AF217116   | NA         |
| <i>Daphnia</i> | <i>carinata</i> | NA         | NA         | NA          | NA         | KJ461676   | NA         |

|                |                     |            |            |             |            |            |            |
|----------------|---------------------|------------|------------|-------------|------------|------------|------------|
| <i>Daphnia</i> | <i>carinata</i>     | NA         | NA         | NA          | NA         | KU876938   | NA         |
| <i>Daphnia</i> | <i>carinata</i>     | NA         | NA         | NA          | NA         | KU876932   | NA         |
| <i>Daphnia</i> | <i>carinata</i>     | NA         | NA         | NA          | NA         | KU876919   | NA         |
| <i>Daphnia</i> | <i>carinata</i>     | NA         | NA         | NA          | NA         | KU876941   | NA         |
| <i>Daphnia</i> | <i>carinata</i>     | NA         | NA         | NA          | NA         | KU876933   | NA         |
| <i>Daphnia</i> | <i>carinata</i>     | NA         | NA         | NA          | NA         | KU876924   | NA         |
| <i>Daphnia</i> | <i>carinata</i>     | NA         | NA         | NA          | NA         | KU876929   | NA         |
| <i>Daphnia</i> | <i>carinata</i>     | NA         | NA         | NA          | NA         | KU876939   | NA         |
| <i>Daphnia</i> | <i>carinata</i>     | NA         | NA         | NA          | NA         | KU876925   | NA         |
| <i>Daphnia</i> | <i>carinata</i>     | NA         | NA         | NA          | NA         | KU876920   | NA         |
| <i>Daphnia</i> | <i>carinata</i>     | NA         | NA         | NA          | NA         | KU876942   | NA         |
| <i>Daphnia</i> | <i>carinata</i>     | NA         | NA         | NA          | NA         | KU876916   | NA         |
| <i>Daphnia</i> | <i>carinata</i>     | NA         | NA         | NA          | NA         | KU876922   | NA         |
| <i>Daphnia</i> | <i>carinata</i>     | NA         | NA         | NA          | NA         | KU876914   | NA         |
| <i>Daphnia</i> | <i>carinata</i>     | NA         | NA         | NA          | NA         | KU876940   | NA         |
| <i>Daphnia</i> | <i>carinata</i>     | NA         | NA         | NA          | NA         | KU876926   | NA         |
| <i>Daphnia</i> | <i>carinata</i>     | NA         | NA         | NA          | NA         | KU876937   | NA         |
| <i>Daphnia</i> | <i>carinata</i>     | NA         | NA         | NA          | NA         | KU720107   | NA         |
| <i>Daphnia</i> | <i>catawba</i>      | AY630608   | AY626363   | NA          | AY626363   | AY380454   | NA         |
| <i>Daphnia</i> | <i>cucullata</i>    | HM161681   | U34652     | HM161681    | U34652     | JF821190   | DQ980402   |
| <b>Genus</b>   | <b>Species</b>      | <b>28s</b> | <b>18s</b> | <b>5.8s</b> | <b>12s</b> | <b>COI</b> | <b>ND2</b> |
| <i>Daphnia</i> | <i>cucullata</i>    | HM161682   | AF277270   | HM161682    | AF277270   | EF375870   | DQ980403   |
| <i>Daphnia</i> | <i>cucullata</i>    | HM161683   | AF277271   | HM161683    | AF277271   | KP668777   | DQ132606   |
| <i>Daphnia</i> | <i>cucullata</i>    | HM161684   | AF277272   | AY730402    | AF277272   | KP668778   | KX844619   |
| <i>Daphnia</i> | <i>cucullata</i>    | HM161685   | AF277269   | HM161684    | AF277269   | KP668779   | KX844620   |
| <i>Daphnia</i> | <i>cucullata</i>    | HM161686   | EF375854   | HM161685    | EF375854   | EF375869   | KX844621   |
| <i>Daphnia</i> | <i>cucullata</i>    | HM161687   | FJ178306   | HM161686    | FJ178306   | NA         | DQ845272   |
| <i>Daphnia</i> | <i>cucullata</i>    | NA         | FJ943782   | HM161687    | FJ943782   | NA         | NA         |
| <i>Daphnia</i> | <i>cucullata</i>    | NA         | FJ943783   | NA          | FJ943783   | NA         | NA         |
| <i>Daphnia</i> | <i>cucullata</i>    | NA         | FJ943784   | NA          | FJ943784   | NA         | NA         |
| <i>Daphnia</i> | <i>cucullata</i>    | NA         | FJ943785   | NA          | FJ943785   | NA         | NA         |
| <i>Daphnia</i> | <i>cucullata</i>    | NA         | FJ943786   | NA          | FJ943786   | NA         | NA         |
| <i>Daphnia</i> | <i>cucullata</i>    | NA         | HM100084   | NA          | HM100084   | NA         | NA         |
| <i>Daphnia</i> | <i>cucullata</i>    | NA         | HM100085   | NA          | HM100085   | NA         | NA         |
| <i>Daphnia</i> | <i>cucullata</i>    | NA         | HM100086   | NA          | HM100086   | NA         | NA         |
| <i>Daphnia</i> | <i>cucullata</i>    | NA         | HM100080   | NA          | HM100080   | NA         | NA         |
| <i>Daphnia</i> | <i>cucullata</i>    | NA         | HM100081   | NA          | HM100081   | NA         | NA         |
| <i>Daphnia</i> | <i>cucullata</i>    | NA         | HM100082   | NA          | HM100082   | NA         | NA         |
| <i>Daphnia</i> | <i>cucullata</i>    | NA         | HM100083   | NA          | HM100083   | NA         | NA         |
| <i>Daphnia</i> | <i>cucullata</i>    | NA         | FJ178309   | NA          | FJ178309   | NA         | NA         |
| <i>Daphnia</i> | <i>cucullata</i>    | NA         | FJ178307   | NA          | FJ178307   | NA         | NA         |
| <i>Daphnia</i> | <i>cucullata</i>    | NA         | FJ178308   | NA          | FJ178308   | NA         | NA         |
| <i>Daphnia</i> | <i>cucullata</i>    | NA         | KX844615   | NA          | KX844615   | NA         | NA         |
| <i>Daphnia</i> | <i>cucullata</i>    | NA         | KX844616   | NA          | KX844616   | NA         | NA         |
| <i>Daphnia</i> | <i>cucullata</i>    | NA         | KX844617   | NA          | KX844617   | NA         | NA         |
| <i>Daphnia</i> | <i>cucullata</i>    | NA         | KX844618   | NA          | KX844618   | NA         | NA         |
| <i>Daphnia</i> | <i>curvirostris</i> | NA         | EF375859   | NA          | AF277280   | JF821191   | KF487533   |
| <i>Daphnia</i> | <i>curvirostris</i> | NA         | AF277280   | NA          | JQ861680   | EF375872   | KP253114   |
| <i>Daphnia</i> | <i>curvirostris</i> | NA         | JQ861680   | NA          | JQ861681   | FJ427487   | DQ132619   |
| <i>Daphnia</i> | <i>curvirostris</i> | NA         | JQ861681   | NA          | JQ861682   | KP668780   | DQ132620   |
| <i>Daphnia</i> | <i>curvirostris</i> | NA         | JQ861682   | NA          | JQ861683   | KP668781   | NA         |
| <i>Daphnia</i> | <i>curvirostris</i> | NA         | JQ861683   | NA          | KY196428   | KP668782   | NA         |
| <i>Daphnia</i> | <i>curvirostris</i> | NA         | KY196428   | NA          | KY196432   | KP668783   | NA         |
| <i>Daphnia</i> | <i>curvirostris</i> | NA         | KY196432   | NA          | KY196435   | NA         | NA         |
| <i>Daphnia</i> | <i>curvirostris</i> | NA         | KY196435   | NA          | KY196425   | NA         | NA         |
| <i>Daphnia</i> | <i>curvirostris</i> | NA         | KY196425   | NA          | U13906     | NA         | NA         |
| <i>Daphnia</i> | <i>curvirostris</i> | NA         | JN903647   | NA          | NA         | NA         | NA         |
| <i>Daphnia</i> | <i>curvirostris</i> | NA         | JN903648   | NA          | NA         | NA         | NA         |
| <i>Daphnia</i> | <i>curvirostris</i> | NA         | JN903649   | NA          | NA         | NA         | NA         |
| <i>Daphnia</i> | <i>curvirostris</i> | NA         | U13906     | NA          | NA         | NA         | NA         |
| <i>Daphnia</i> | <i>dentifora</i>    | NA         | AB642030   | NA          | U34733     | NA         | NA         |
| <i>Daphnia</i> | <i>dentifora</i>    | NA         | NA         | NA          | U34732     | NA         | NA         |
| <b>Genus</b>   | <b>Species</b>      | <b>28s</b> | <b>18s</b> | <b>5.8s</b> | <b>12s</b> | <b>COI</b> | <b>ND2</b> |
| <i>Daphnia</i> | <i>galeata</i>      | AF532888   | AF064174   | AY730378    | AF06417    | KF993365   | DQ980238   |
| <i>Daphnia</i> | <i>galeata</i>      | HM161688   | U34651     | AY730397    | U34651     | MG544047   | DQ980247   |

|                |                |            |            |             |            |            |            |
|----------------|----------------|------------|------------|-------------|------------|------------|------------|
| <i>Daphnia</i> | <i>galeata</i> | HM161689   | U34650     | AY730396    | U34650     | MG544048   | DQ980248   |
| <i>Daphnia</i> | <i>galeata</i> | HM161694   | U34649     | AY730379    | U34649     | MG544049   | DQ980249   |
| <i>Daphnia</i> | <i>galeata</i> | HM161695   | U34648     | AY730381    | U34648     | MG544056   | DQ980250   |
| <i>Daphnia</i> | <i>galeata</i> | HM161696   | U34647     | HM161688    | U34647     | MG544057   | DQ980251   |
| <i>Daphnia</i> | <i>galeata</i> | HM161697   | U34646     | HM161689    | U34646     | MG544058   | DQ980252   |
| <i>Daphnia</i> | <i>galeata</i> | HM161690   | AF277266   | HM161694    | AF277266   | MG544068   | DQ980253   |
| <i>Daphnia</i> | <i>galeata</i> | HM161691   | AF277268   | HM161695    | AF277268   | MG544069   | DQ980254   |
| <i>Daphnia</i> | <i>galeata</i> | HM161692   | DQ337927   | HM161696    | DQ337927   | MG544070   | DQ980255   |
| <i>Daphnia</i> | <i>galeata</i> | HM161693   | DQ337928   | HM161697    | DQ337928   | JF821192   | DQ980256   |
| <i>Daphnia</i> | <i>galeata</i> | HM161698   | DQ337926   | HM161690    | DQ337926   | KY700828   | DQ980239   |
| <i>Daphnia</i> | <i>galeata</i> | HM161699   | AF277265   | HM161691    | AF277265   | KF993374   | DQ980257   |
| <i>Daphnia</i> | <i>galeata</i> | HM161700   | EF375852   | HM161692    | EF375852   | KP668786   | DQ980258   |
| <i>Daphnia</i> | <i>galeata</i> | HM161701   | KF214463   | HM161693    | KF214463   | KP668784   | DQ980259   |
| <i>Daphnia</i> | <i>galeata</i> | HM161702   | AY730363   | AY730401    | AY730363   | KP668785   | DQ980260   |
| <i>Daphnia</i> | <i>galeata</i> | HM161703   | AY730365   | AY730399    | AY730365   | GQ457332   | DQ980261   |
| <i>Daphnia</i> | <i>galeata</i> | HM161704   | AY730367   | AY730380    | AY730367   | KM555358   | DQ980262   |
| <i>Daphnia</i> | <i>galeata</i> | KY694377   | AY730366   | AY730377    | AY730366   | KM555354   | DQ980263   |
| <i>Daphnia</i> | <i>galeata</i> | NA         | KX027446   | AY730398    | KX027446   | KM555355   | DQ980264   |
| <i>Daphnia</i> | <i>galeata</i> | NA         | KX027447   | AY730388    | KX027447   | KM555356   | DQ980265   |
| <i>Daphnia</i> | <i>galeata</i> | NA         | JN903661   | AY730382    | JN903661   | KM590523   | DQ980266   |
| <i>Daphnia</i> | <i>galeata</i> | NA         | JQ861657   | HM161698    | JQ861657   | KM555357   | DQ980240   |
| <i>Daphnia</i> | <i>galeata</i> | NA         | JQ861658   | HM161699    | JQ861658   | KM555359   | DQ980267   |
| <i>Daphnia</i> | <i>galeata</i> | NA         | JQ861659   | HM161700    | JQ861659   | KM555360   | DQ980268   |
| <i>Daphnia</i> | <i>galeata</i> | NA         | KX027448   | HM161701    | KX027448   | KM555361   | DQ980269   |
| <i>Daphnia</i> | <i>galeata</i> | NA         | KF214462   | HM161702    | KF214462   | EF375868   | DQ980270   |
| <i>Daphnia</i> | <i>galeata</i> | NA         | AY730368   | HM161703    | AY730368   | EF375867   | DQ980271   |
| <i>Daphnia</i> | <i>galeata</i> | NA         | MH052572   | HM161704    | MH052572   | KM555362   | DQ980272   |
| <i>Daphnia</i> | <i>galeata</i> | NA         | HM161705   | AY730400    | HM161705   | LC215466   | DQ980273   |
| <i>Daphnia</i> | <i>galeata</i> | NA         | HM100095   | NA          | HM100095   | KU720109   | DQ980274   |
| <i>Daphnia</i> | <i>galeata</i> | NA         | HM100096   | NA          | HM100096   | NA         | DQ980275   |
| <i>Daphnia</i> | <i>galeata</i> | NA         | HM100103   | NA          | HM100103   | NA         | DQ980276   |
| <i>Daphnia</i> | <i>galeata</i> | NA         | HM100097   | NA          | HM100097   | NA         | DQ980241   |
| <i>Daphnia</i> | <i>galeata</i> | NA         | HM100104   | NA          | HM100104   | NA         | DQ980277   |
| <i>Daphnia</i> | <i>galeata</i> | NA         | HM161706   | NA          | HM161706   | NA         | DQ980278   |
| <i>Daphnia</i> | <i>galeata</i> | NA         | HM100098   | NA          | HM100098   | NA         | DQ980279   |
| <i>Daphnia</i> | <i>galeata</i> | NA         | HM100099   | NA          | HM100099   | NA         | DQ980280   |
| <i>Daphnia</i> | <i>galeata</i> | NA         | HM100105   | NA          | HM100105   | NA         | DQ980242   |
| <i>Daphnia</i> | <i>galeata</i> | NA         | HM100100   | NA          | HM100100   | NA         | DQ980243   |
| <i>Daphnia</i> | <i>galeata</i> | NA         | HM100101   | NA          | HM100101   | NA         | DQ980244   |
| <b>Genus</b>   | <b>Species</b> | <b>28s</b> | <b>18s</b> | <b>5.8s</b> | <b>12s</b> | <b>COI</b> | <b>ND2</b> |
| <i>Daphnia</i> | <i>galeata</i> | NA         | HM161707   | NA          | HM161707   | NA         | DQ980245   |
| <i>Daphnia</i> | <i>galeata</i> | NA         | HM161708   | NA          | HM161708   | NA         | DQ980246   |
| <i>Daphnia</i> | <i>galeata</i> | NA         | HM161709   | NA          | HM161709   | NA         | DQ980281   |
| <i>Daphnia</i> | <i>galeata</i> | NA         | HM100093   | NA          | HM100093   | NA         | DQ980282   |
| <i>Daphnia</i> | <i>galeata</i> | NA         | HM100102   | NA          | HM100102   | NA         | DQ980291   |
| <i>Daphnia</i> | <i>galeata</i> | NA         | HM100094   | NA          | HM100094   | NA         | DQ980381   |
| <i>Daphnia</i> | <i>galeata</i> | NA         | KF214464   | NA          | KF214464   | NA         | DQ980382   |
| <i>Daphnia</i> | <i>galeata</i> | NA         | JQ861650   | NA          | JQ861650   | NA         | DQ980383   |
| <i>Daphnia</i> | <i>galeata</i> | NA         | JQ861649   | NA          | JQ861649   | NA         | DQ980384   |
| <i>Daphnia</i> | <i>galeata</i> | NA         | KX027449   | NA          | KX027449   | NA         | DQ980385   |
| <i>Daphnia</i> | <i>galeata</i> | NA         | FJ178301   | NA          | FJ178301   | NA         | DQ980386   |
| <i>Daphnia</i> | <i>galeata</i> | NA         | FJ178302   | NA          | FJ178302   | NA         | DQ980387   |
| <i>Daphnia</i> | <i>galeata</i> | NA         | FJ178303   | NA          | FJ178303   | NA         | DQ980388   |
| <i>Daphnia</i> | <i>galeata</i> | NA         | JQ861654   | NA          | JQ861654   | NA         | DQ980389   |
| <i>Daphnia</i> | <i>galeata</i> | NA         | JQ861656   | NA          | JQ861656   | NA         | DQ980390   |
| <i>Daphnia</i> | <i>galeata</i> | NA         | JQ861655   | NA          | JQ861655   | NA         | DQ980292   |
| <i>Daphnia</i> | <i>galeata</i> | NA         | JQ861651   | NA          | JQ861651   | NA         | DQ980391   |
| <i>Daphnia</i> | <i>galeata</i> | NA         | JQ861652   | NA          | JQ861652   | NA         | DQ980392   |
| <i>Daphnia</i> | <i>galeata</i> | NA         | JQ861653   | NA          | JQ861653   | NA         | DQ980393   |
| <i>Daphnia</i> | <i>galeata</i> | NA         | KF214465   | NA          | KF214465   | NA         | DQ980394   |
| <i>Daphnia</i> | <i>galeata</i> | NA         | AY730360   | NA          | AY730360   | NA         | DQ980395   |
| <i>Daphnia</i> | <i>galeata</i> | NA         | JQ861645   | NA          | JQ861645   | NA         | DQ980396   |
| <i>Daphnia</i> | <i>galeata</i> | NA         | JQ861646   | NA          | JQ861646   | NA         | DQ980397   |
| <i>Daphnia</i> | <i>galeata</i> | NA         | MH052573   | NA          | MH052573   | NA         | DQ980293   |
| <i>Daphnia</i> | <i>galeata</i> | NA         | MH052574   | NA          | MH052574   | NA         | DQ980294   |

|                |                |            |            |             |            |            |            |
|----------------|----------------|------------|------------|-------------|------------|------------|------------|
| <i>Daphnia</i> | <i>galeata</i> | NA         | KF214466   | NA          | KF214466   | NA         | DQ980295   |
| <i>Daphnia</i> | <i>galeata</i> | NA         | FJ943776   | NA          | FJ943776   | NA         | DQ980296   |
| <i>Daphnia</i> | <i>galeata</i> | NA         | FJ943777   | NA          | FJ943777   | NA         | DQ980297   |
| <i>Daphnia</i> | <i>galeata</i> | NA         | FJ943778   | NA          | FJ943778   | NA         | DQ980298   |
| <i>Daphnia</i> | <i>galeata</i> | NA         | FJ943779   | NA          | FJ943779   | NA         | DQ980299   |
| <i>Daphnia</i> | <i>galeata</i> | NA         | FJ943780   | NA          | FJ943780   | NA         | DQ980300   |
| <i>Daphnia</i> | <i>galeata</i> | NA         | FJ943781   | NA          | FJ943781   | NA         | DQ980283   |
| <i>Daphnia</i> | <i>galeata</i> | NA         | AY730361   | NA          | AY730361   | NA         | DQ980301   |
| <i>Daphnia</i> | <i>galeata</i> | NA         | KP253087   | NA          | KP253087   | NA         | DQ980302   |
| <i>Daphnia</i> | <i>galeata</i> | NA         | MH052575   | NA          | MH052575   | NA         | DQ980303   |
| <i>Daphnia</i> | <i>galeata</i> | NA         | KX027453   | NA          | KX027453   | NA         | DQ980304   |
| <i>Daphnia</i> | <i>galeata</i> | NA         | KM555340   | NA          | KM555341   | NA         | DQ980305   |
| <i>Daphnia</i> | <i>galeata</i> | NA         | KM555341   | NA          | KM555342   | NA         | DQ980306   |
| <i>Daphnia</i> | <i>galeata</i> | NA         | KM555342   | NA          | KM555343   | NA         | DQ980307   |
| <i>Daphnia</i> | <i>galeata</i> | NA         | KM555343   | NA          | MH378264   | NA         | DQ980308   |
| <i>Daphnia</i> | <i>galeata</i> | NA         | MH378264   | NA          | MH052570   | NA         | DQ980309   |
| <b>Genus</b>   | <b>Species</b> | <b>28s</b> | <b>18s</b> | <b>5.8s</b> | <b>12s</b> | <b>COI</b> | <b>ND2</b> |
| <i>Daphnia</i> | <i>galeata</i> | NA         | MH052570   | NA          | MH052571   | NA         | DQ980310   |
| <i>Daphnia</i> | <i>galeata</i> | NA         | MH052571   | NA          | AY730359   | NA         | DQ980284   |
| <i>Daphnia</i> | <i>galeata</i> | NA         | AY730359   | NA          | JQ861647   | NA         | DQ980311   |
| <i>Daphnia</i> | <i>galeata</i> | NA         | JQ861647   | NA          | JQ861648   | NA         | DQ980312   |
| <i>Daphnia</i> | <i>galeata</i> | NA         | JQ861648   | NA          | JN903650   | NA         | DQ980313   |
| <i>Daphnia</i> | <i>galeata</i> | NA         | JN903650   | NA          | JN903651   | NA         | DQ980314   |
| <i>Daphnia</i> | <i>galeata</i> | NA         | JN903651   | NA          | JN903652   | NA         | DQ980315   |
| <i>Daphnia</i> | <i>galeata</i> | NA         | JN903652   | NA          | JN903653   | NA         | DQ980316   |
| <i>Daphnia</i> | <i>galeata</i> | NA         | JN903653   | NA          | JN903654   | NA         | DQ980317   |
| <i>Daphnia</i> | <i>galeata</i> | NA         | JN903654   | NA          | JN903655   | NA         | DQ980318   |
| <i>Daphnia</i> | <i>galeata</i> | NA         | JN903655   | NA          | JN903656   | NA         | DQ980319   |
| <i>Daphnia</i> | <i>galeata</i> | NA         | JN903656   | NA          | JN903657   | NA         | DQ980320   |
| <i>Daphnia</i> | <i>galeata</i> | NA         | JN903657   | NA          | JN903658   | NA         | DQ980285   |
| <i>Daphnia</i> | <i>galeata</i> | NA         | JN903658   | NA          | JN903659   | NA         | DQ980321   |
| <i>Daphnia</i> | <i>galeata</i> | NA         | JN903659   | NA          | JN903660   | NA         | DQ980322   |
| <i>Daphnia</i> | <i>galeata</i> | NA         | JN903660   | NA          | JQ861626   | NA         | DQ980323   |
| <i>Daphnia</i> | <i>galeata</i> | NA         | JQ861626   | NA          | JQ861627   | NA         | DQ980324   |
| <i>Daphnia</i> | <i>galeata</i> | NA         | JQ861627   | NA          | JQ861628   | NA         | DQ980325   |
| <i>Daphnia</i> | <i>galeata</i> | NA         | JQ861628   | NA          | JQ861629   | NA         | DQ980326   |
| <i>Daphnia</i> | <i>galeata</i> | NA         | JQ861629   | NA          | JQ861630   | NA         | DQ980327   |
| <i>Daphnia</i> | <i>galeata</i> | NA         | JQ861630   | NA          | JQ861624   | NA         | DQ980328   |
| <i>Daphnia</i> | <i>galeata</i> | NA         | JQ861624   | NA          | JQ861625   | NA         | DQ980329   |
| <i>Daphnia</i> | <i>galeata</i> | NA         | JQ861625   | NA          | KX027450   | NA         | DQ980330   |
| <i>Daphnia</i> | <i>galeata</i> | NA         | KX027450   | NA          | KX027451   | NA         | DQ980286   |
| <i>Daphnia</i> | <i>galeata</i> | NA         | KX027451   | NA          | KM555344   | NA         | DQ980331   |
| <i>Daphnia</i> | <i>galeata</i> | NA         | KM555344   | NA          | KM555345   | NA         | DQ980332   |
| <i>Daphnia</i> | <i>galeata</i> | NA         | KM555345   | NA          | KM555346   | NA         | DQ980333   |
| <i>Daphnia</i> | <i>galeata</i> | NA         | KM555346   | NA          | MH052576   | NA         | DQ980334   |
| <i>Daphnia</i> | <i>galeata</i> | NA         | MH052576   | NA          | AY730369   | NA         | DQ980335   |
| <i>Daphnia</i> | <i>galeata</i> | NA         | AY730369   | NA          | JQ861621   | NA         | DQ980336   |
| <i>Daphnia</i> | <i>galeata</i> | NA         | JQ861621   | NA          | JQ861622   | NA         | DQ980337   |
| <i>Daphnia</i> | <i>galeata</i> | NA         | JQ861622   | NA          | JQ861623   | NA         | DQ980338   |
| <i>Daphnia</i> | <i>galeata</i> | NA         | JQ861623   | NA          | MH052577   | NA         | DQ980339   |
| <i>Daphnia</i> | <i>galeata</i> | NA         | MH052577   | NA          | AY730364   | NA         | DQ980340   |
| <i>Daphnia</i> | <i>galeata</i> | NA         | AY730364   | NA          | JQ861631   | NA         | DQ980287   |
| <i>Daphnia</i> | <i>galeata</i> | NA         | JQ861631   | NA          | JQ861632   | NA         | DQ980341   |
| <i>Daphnia</i> | <i>galeata</i> | NA         | JQ861632   | NA          | HM100087   | NA         | DQ980342   |
| <i>Daphnia</i> | <i>galeata</i> | NA         | HM100087   | NA          | HM100088   | NA         | DQ980343   |
| <i>Daphnia</i> | <i>galeata</i> | NA         | HM100088   | NA          | HM100089   | NA         | DQ980344   |
| <i>Daphnia</i> | <i>galeata</i> | NA         | HM100089   | NA          | HM100090   | NA         | DQ980345   |
| <i>Daphnia</i> | <i>galeata</i> | NA         | HM100090   | NA          | HM100091   | NA         | DQ980346   |
| <b>Genus</b>   | <b>Species</b> | <b>28s</b> | <b>18s</b> | <b>5.8s</b> | <b>12s</b> | <b>COI</b> | <b>ND2</b> |
| <i>Daphnia</i> | <i>galeata</i> | NA         | HM100091   | NA          | HM100092   | NA         | DQ980347   |
| <i>Daphnia</i> | <i>galeata</i> | NA         | HM100092   | NA          | JX134359   | NA         | DQ980348   |
| <i>Daphnia</i> | <i>galeata</i> | NA         | JX134359   | NA          | JQ861639   | NA         | DQ980349   |
| <i>Daphnia</i> | <i>galeata</i> | NA         | JQ861639   | NA          | JQ861633   | NA         | DQ980350   |
| <i>Daphnia</i> | <i>galeata</i> | NA         | JQ861633   | NA          | JQ861634   | NA         | DQ980288   |
| <i>Daphnia</i> | <i>galeata</i> | NA         | JQ861634   | NA          | JQ861635   | NA         | DQ980351   |

|                |                |            |            |             |            |            |            |
|----------------|----------------|------------|------------|-------------|------------|------------|------------|
| <i>Daphnia</i> | <i>galeata</i> | NA         | JQ861635   | NA          | JQ861636   | NA         | DQ980352   |
| <i>Daphnia</i> | <i>galeata</i> | NA         | JQ861636   | NA          | JQ861637   | NA         | DQ980353   |
| <i>Daphnia</i> | <i>galeata</i> | NA         | JQ861637   | NA          | JQ861638   | NA         | DQ980354   |
| <i>Daphnia</i> | <i>galeata</i> | NA         | JQ861638   | NA          | MH378262   | NA         | DQ980355   |
| <i>Daphnia</i> | <i>galeata</i> | NA         | MH378262   | NA          | MH378263   | NA         | DQ980356   |
| <i>Daphnia</i> | <i>galeata</i> | NA         | MH378263   | NA          | KP253088   | NA         | DQ980357   |
| <i>Daphnia</i> | <i>galeata</i> | NA         | KP253088   | NA          | AY730362   | NA         | DQ980358   |
| <i>Daphnia</i> | <i>galeata</i> | NA         | AY730362   | NA          | JQ861643   | NA         | DQ980359   |
| <i>Daphnia</i> | <i>galeata</i> | NA         | JQ861643   | NA          | JQ861644   | NA         | DQ980360   |
| <i>Daphnia</i> | <i>galeata</i> | NA         | JQ861644   | NA          | EF375853   | NA         | DQ980289   |
| <i>Daphnia</i> | <i>galeata</i> | NA         | EF375853   | NA          | FJ178304   | NA         | DQ980361   |
| <i>Daphnia</i> | <i>galeata</i> | NA         | FJ178304   | NA          | FJ178305   | NA         | DQ980362   |
| <i>Daphnia</i> | <i>galeata</i> | NA         | FJ178305   | NA          | EF375851   | NA         | DQ980363   |
| <i>Daphnia</i> | <i>galeata</i> | NA         | EF375851   | NA          | JQ861640   | NA         | DQ980364   |
| <i>Daphnia</i> | <i>galeata</i> | NA         | JQ861640   | NA          | JQ861641   | NA         | DQ980365   |
| <i>Daphnia</i> | <i>galeata</i> | NA         | JQ861641   | NA          | JQ861642   | NA         | DQ980366   |
| <i>Daphnia</i> | <i>galeata</i> | NA         | JQ861642   | NA          | U13907     | NA         | DQ980367   |
| <i>Daphnia</i> | <i>galeata</i> | NA         | U13907     | NA          | KX027452   | NA         | DQ980368   |
| <i>Daphnia</i> | <i>galeata</i> | NA         | KX027452   | NA          | AB641989   | NA         | DQ980369   |
| <i>Daphnia</i> | <i>galeata</i> | NA         | NC_034297  | NA          | AB641994   | NA         | DQ980370   |
| <i>Daphnia</i> | <i>galeata</i> | NA         | LC152879   | NA          | AB642002   | NA         | DQ980290   |
| <i>Daphnia</i> | <i>galeata</i> | NA         | LC177071   | NA          | AB642009   | NA         | DQ980371   |
| <i>Daphnia</i> | <i>galeata</i> | NA         | LC177072   | NA          | AB642022   | NA         | DQ980372   |
| <i>Daphnia</i> | <i>galeata</i> | NA         | LC177070   | NA          | AB642028   | NA         | DQ980373   |
| <i>Daphnia</i> | <i>galeata</i> | NA         | LC177110   | NA          | AB642029   | NA         | DQ980374   |
| <i>Daphnia</i> | <i>galeata</i> | NA         | AB641989   | NA          | AB642031   | NA         | DQ980375   |
| <i>Daphnia</i> | <i>galeata</i> | NA         | AB641994   | NA          | AB642037   | NA         | DQ980376   |
| <i>Daphnia</i> | <i>galeata</i> | NA         | AB642002   | NA          | AB642038   | NA         | DQ980377   |
| <i>Daphnia</i> | <i>galeata</i> | NA         | AB642009   | NA          | AB642042   | NA         | DQ980378   |
| <i>Daphnia</i> | <i>galeata</i> | NA         | AB642022   | NA          | AB642043   | NA         | DQ980379   |
| <i>Daphnia</i> | <i>galeata</i> | NA         | AB642028   | NA          | AB642048   | NA         | DQ980380   |
| <i>Daphnia</i> | <i>galeata</i> | NA         | AB642029   | NA          | KY694164   | NA         | DQ980398   |
| <i>Daphnia</i> | <i>galeata</i> | NA         | AB642031   | NA          | NA         | NA         | DQ980399   |
| <i>Daphnia</i> | <i>galeata</i> | NA         | AB642037   | NA          | NA         | NA         | DQ980400   |
| <i>Daphnia</i> | <i>galeata</i> | NA         | AB642038   | NA          | NA         | NA         | DQ980401   |
| <b>Genus</b>   | <b>Species</b> | <b>28s</b> | <b>18s</b> | <b>5.8s</b> | <b>12s</b> | <b>COI</b> | <b>ND2</b> |
| <i>Daphnia</i> | <i>galeata</i> | NA         | AB642042   | NA          | NA         | NA         | KX027460   |
| <i>Daphnia</i> | <i>galeata</i> | NA         | AB642043   | NA          | NA         | NA         | KP253108   |
| <i>Daphnia</i> | <i>galeata</i> | NA         | AB642048   | NA          | NA         | NA         | KP253109   |
| <i>Daphnia</i> | <i>galeata</i> | NA         | KY694164   | NA          | NA         | NA         | KX027471   |
| <i>Daphnia</i> | <i>galeata</i> | NA         | NA         | NA          | NA         | NA         | KX027472   |
| <i>Daphnia</i> | <i>galeata</i> | NA         | NA         | NA          | NA         | NA         | KX027473   |
| <i>Daphnia</i> | <i>galeata</i> | NA         | NA         | NA          | NA         | NA         | KX027474   |
| <i>Daphnia</i> | <i>galeata</i> | NA         | NA         | NA          | NA         | NA         | KX027475   |
| <i>Daphnia</i> | <i>galeata</i> | NA         | NA         | NA          | NA         | NA         | KX027469   |
| <i>Daphnia</i> | <i>galeata</i> | NA         | NA         | NA          | NA         | NA         | KX027466   |
| <i>Daphnia</i> | <i>galeata</i> | NA         | NA         | NA          | NA         | NA         | KP253106   |
| <i>Daphnia</i> | <i>galeata</i> | NA         | NA         | NA          | NA         | NA         | KP253107   |
| <i>Daphnia</i> | <i>galeata</i> | NA         | NA         | NA          | NA         | NA         | KX027484   |
| <i>Daphnia</i> | <i>galeata</i> | NA         | NA         | NA          | NA         | NA         | KX027461   |
| <i>Daphnia</i> | <i>galeata</i> | NA         | NA         | NA          | NA         | NA         | KX027462   |
| <i>Daphnia</i> | <i>galeata</i> | NA         | NA         | NA          | NA         | NA         | KP253113   |
| <i>Daphnia</i> | <i>galeata</i> | NA         | NA         | NA          | NA         | NA         | KX027463   |
| <i>Daphnia</i> | <i>galeata</i> | NA         | NA         | NA          | NA         | NA         | KX027464   |
| <i>Daphnia</i> | <i>galeata</i> | NA         | NA         | NA          | NA         | NA         | KX027465   |
| <i>Daphnia</i> | <i>galeata</i> | NA         | NA         | NA          | NA         | NA         | KX027470   |
| <i>Daphnia</i> | <i>galeata</i> | NA         | NA         | NA          | NA         | NA         | KX027485   |
| <i>Daphnia</i> | <i>galeata</i> | NA         | NA         | NA          | NA         | NA         | KX844623   |
| <i>Daphnia</i> | <i>galeata</i> | NA         | NA         | NA          | NA         | NA         | KX844622   |
| <i>Daphnia</i> | <i>galeata</i> | NA         | NA         | NA          | NA         | NA         | KP253110   |
| <i>Daphnia</i> | <i>galeata</i> | NA         | NA         | NA          | NA         | NA         | KX027479   |
| <i>Daphnia</i> | <i>galeata</i> | NA         | NA         | NA          | NA         | NA         | KX027480   |
| <i>Daphnia</i> | <i>galeata</i> | NA         | NA         | NA          | NA         | NA         | KP253111   |
| <i>Daphnia</i> | <i>galeata</i> | NA         | NA         | NA          | NA         | NA         | KX027481   |
| <i>Daphnia</i> | <i>galeata</i> | NA         | NA         | NA          | NA         | NA         | KX027483   |

|                |                   |            |            |             |            |            |            |
|----------------|-------------------|------------|------------|-------------|------------|------------|------------|
| <i>Daphnia</i> | <i>galeata</i>    | NA         | NA         | NA          | NA         | NA         | KP253112   |
| <i>Daphnia</i> | <i>galeata</i>    | NA         | NA         | NA          | NA         | NA         | DQ132605   |
| <i>Daphnia</i> | <i>galeata</i>    | NA         | NA         | NA          | NA         | NA         | KX027468   |
| <i>Daphnia</i> | <i>galeata</i>    | NA         | NA         | NA          | NA         | NA         | KX027477   |
| <i>Daphnia</i> | <i>galeata</i>    | NA         | NA         | NA          | NA         | NA         | KX027478   |
| <i>Daphnia</i> | <i>galeata</i>    | NA         | NA         | NA          | NA         | NA         | KX027476   |
| <i>Daphnia</i> | <i>galeata</i>    | NA         | NA         | NA          | NA         | NA         | DQ845273   |
| <i>Daphnia</i> | <i>gessneri</i>   | NA         | NA         | NA          | NA         | FJ427489   | NA         |
| <i>Daphnia</i> | <i>gessneri</i>   | NA         | NA         | NA          | NA         | AY323071   | NA         |
| <i>Daphnia</i> | <i>gessneri</i>   | NA         | NA         | NA          | NA         | KY659310   | NA         |
| <i>Daphnia</i> | <i>longispina</i> | NA         | U34643     | AY730385    | U34643     | MG544043   | KP253116   |
| <i>Daphnia</i> | <i>longispina</i> | NA         | U34642     | AY730394    | U34642     | MG544044   | KP253118   |
| <b>Genus</b>   | <b>Species</b>    | <b>28s</b> | <b>18s</b> | <b>5.8s</b> | <b>12s</b> | <b>COI</b> | <b>ND2</b> |
| <i>Daphnia</i> | <i>longispina</i> | NA         | EF375847   | AY730386    | EF375847   | MG544045   | KP253117   |
| <i>Daphnia</i> | <i>longispina</i> | NA         | EF375846   | AY730395    | EF375846   | MG544065   | KP253093   |
| <i>Daphnia</i> | <i>longispina</i> | NA         | EF375845   | AY730393    | EF375845   | MG544066   | KP253094   |
| <i>Daphnia</i> | <i>longispina</i> | NA         | EF375844   | NA          | EF375844   | MG544067   | KP253091   |
| <i>Daphnia</i> | <i>longispina</i> | NA         | EF375842   | NA          | EF375842   | MG544080   | KP253095   |
| <i>Daphnia</i> | <i>longispina</i> | NA         | EF375841   | NA          | EF375841   | MG544081   | KP253092   |
| <i>Daphnia</i> | <i>longispina</i> | NA         | EF375840   | NA          | EF375840   | MG544082   | KP253089   |
| <i>Daphnia</i> | <i>longispina</i> | NA         | EF375839   | NA          | EF375839   | JF821193   | KP253102   |
| <i>Daphnia</i> | <i>longispina</i> | NA         | EF375838   | NA          | EF375838   | EF375862   | KP253101   |
| <i>Daphnia</i> | <i>longispina</i> | NA         | EF375837   | NA          | EF375837   | EF375861   | KP253103   |
| <i>Daphnia</i> | <i>longispina</i> | NA         | EF375836   | NA          | EF375836   | EF375860   | KP253104   |
| <i>Daphnia</i> | <i>longispina</i> | NA         | EF375835   | NA          | EF375835   | NA         | KP253105   |
| <i>Daphnia</i> | <i>longispina</i> | NA         | EF375834   | NA          | EF375834   | NA         | KP253096   |
| <i>Daphnia</i> | <i>longispina</i> | NA         | EF375833   | NA          | EF375833   | NA         | KP253100   |
| <i>Daphnia</i> | <i>longispina</i> | NA         | EF375832   | NA          | EF375832   | NA         | DQ132608   |
| <i>Daphnia</i> | <i>longispina</i> | NA         | EF375831   | NA          | EF375831   | NA         | DQ132610   |
| <i>Daphnia</i> | <i>longispina</i> | NA         | EF375830   | NA          | EF375830   | NA         | DQ132612   |
| <i>Daphnia</i> | <i>longispina</i> | NA         | EF375828   | NA          | EF375828   | NA         | KP253090   |
| <i>Daphnia</i> | <i>longispina</i> | NA         | AF277279   | NA          | AF277279   | NA         | KP253097   |
| <i>Daphnia</i> | <i>longispina</i> | NA         | AF277278   | NA          | AF277278   | NA         | KP253098   |
| <i>Daphnia</i> | <i>longispina</i> | NA         | U34645     | NA          | U34645     | NA         | KP253099   |
| <i>Daphnia</i> | <i>longispina</i> | NA         | U34644     | NA          | U34644     | NA         | NA         |
| <i>Daphnia</i> | <i>longispina</i> | NA         | U34638     | NA          | U34638     | NA         | NA         |
| <i>Daphnia</i> | <i>longispina</i> | NA         | AF277274   | NA          | AF277274   | NA         | NA         |
| <i>Daphnia</i> | <i>longispina</i> | NA         | JX457151   | NA          | JX457151   | NA         | NA         |
| <i>Daphnia</i> | <i>longispina</i> | NA         | AF277273   | NA          | AF277273   | NA         | NA         |
| <i>Daphnia</i> | <i>longispina</i> | NA         | DQ337939   | NA          | DQ337939   | NA         | NA         |
| <i>Daphnia</i> | <i>longispina</i> | NA         | DQ337938   | NA          | DQ337938   | NA         | NA         |
| <i>Daphnia</i> | <i>longispina</i> | NA         | DQ337937   | NA          | DQ337937   | NA         | NA         |
| <i>Daphnia</i> | <i>longispina</i> | NA         | DQ337936   | NA          | DQ337936   | NA         | NA         |
| <i>Daphnia</i> | <i>longispina</i> | NA         | DQ337935   | NA          | DQ337935   | NA         | NA         |
| <i>Daphnia</i> | <i>longispina</i> | NA         | DQ337934   | NA          | DQ337934   | NA         | NA         |
| <i>Daphnia</i> | <i>longispina</i> | NA         | DQ337933   | NA          | DQ337933   | NA         | NA         |
| <i>Daphnia</i> | <i>longispina</i> | NA         | DQ337932   | NA          | DQ337932   | NA         | NA         |
| <i>Daphnia</i> | <i>longispina</i> | NA         | DQ337931   | NA          | DQ337931   | NA         | NA         |
| <i>Daphnia</i> | <i>longispina</i> | NA         | DQ337930   | NA          | DQ337930   | NA         | NA         |
| <i>Daphnia</i> | <i>longispina</i> | NA         | DQ337929   | NA          | DQ337929   | NA         | NA         |
| <i>Daphnia</i> | <i>longispina</i> | NA         | JX457152   | NA          | JX457152   | NA         | NA         |
| <i>Daphnia</i> | <i>longispina</i> | NA         | AF277275   | NA          | AF277275   | NA         | NA         |
| <i>Daphnia</i> | <i>longispina</i> | NA         | JX446619   | NA          | JX446619   | NA         | NA         |
| <i>Daphnia</i> | <i>longispina</i> | NA         | JX069355   | NA          | JX069355   | NA         | NA         |
| <b>Genus</b>   | <b>Species</b>    | <b>28s</b> | <b>18s</b> | <b>5.8s</b> | <b>12s</b> | <b>COI</b> | <b>ND2</b> |
| <i>Daphnia</i> | <i>longispina</i> | NA         | JX069354   | NA          | JX069354   | NA         | NA         |
| <i>Daphnia</i> | <i>longispina</i> | NA         | JX069353   | NA          | JX069353   | NA         | NA         |
| <i>Daphnia</i> | <i>longispina</i> | NA         | KY652589   | NA          | KY652589   | NA         | NA         |
| <i>Daphnia</i> | <i>longispina</i> | NA         | JX069352   | NA          | JX069352   | NA         | NA         |
| <i>Daphnia</i> | <i>longispina</i> | NA         | JX069358   | NA          | JX069358   | NA         | NA         |
| <i>Daphnia</i> | <i>longispina</i> | NA         | JX069361   | NA          | JX069361   | NA         | NA         |
| <i>Daphnia</i> | <i>longispina</i> | NA         | JX069360   | NA          | JX069360   | NA         | NA         |
| <i>Daphnia</i> | <i>longispina</i> | NA         | JX069357   | NA          | JX069357   | NA         | NA         |
| <i>Daphnia</i> | <i>longispina</i> | NA         | JX069356   | NA          | JX069356   | NA         | NA         |
| <i>Daphnia</i> | <i>longispina</i> | NA         | JX069359   | NA          | JX069359   | NA         | NA         |

| <i>Daphnia</i> | <i>longispina</i> | NA  | EF375827 | NA   | EF375827 | NA  | NA  |
|----------------|-------------------|-----|----------|------|----------|-----|-----|
| <i>Daphnia</i> | <i>longispina</i> | NA  | FJ178310 | NA   | FJ178310 | NA  | NA  |
| <i>Daphnia</i> | <i>longispina</i> | NA  | FJ178311 | NA   | FJ178311 | NA  | NA  |
| <i>Daphnia</i> | <i>longispina</i> | NA  | JN903675 | NA   | JN903675 | NA  | NA  |
| <i>Daphnia</i> | <i>longispina</i> | NA  | JN903676 | NA   | JN903676 | NA  | NA  |
| <i>Daphnia</i> | <i>longispina</i> | NA  | JN903677 | NA   | JN903677 | NA  | NA  |
| <i>Daphnia</i> | <i>longispina</i> | NA  | JN903678 | NA   | JN903678 | NA  | NA  |
| <i>Daphnia</i> | <i>longispina</i> | NA  | JN903679 | NA   | JN903679 | NA  | NA  |
| <i>Daphnia</i> | <i>longispina</i> | NA  | JN903680 | NA   | JN903680 | NA  | NA  |
| <i>Daphnia</i> | <i>longispina</i> | NA  | JX134330 | NA   | JX134330 | NA  | NA  |
| <i>Daphnia</i> | <i>longispina</i> | NA  | JX134331 | NA   | JX134331 | NA  | NA  |
| <i>Daphnia</i> | <i>longispina</i> | NA  | KF977689 | NA   | KF977689 | NA  | NA  |
| <i>Daphnia</i> | <i>longispina</i> | NA  | JQ861669 | NA   | JQ861669 | NA  | NA  |
| <i>Daphnia</i> | <i>longispina</i> | NA  | JQ861670 | NA   | JQ861670 | NA  | NA  |
| <i>Daphnia</i> | <i>longispina</i> | NA  | JQ861671 | NA   | JQ861671 | NA  | NA  |
| <i>Daphnia</i> | <i>longispina</i> | NA  | JQ861672 | NA   | JQ861672 | NA  | NA  |
| <i>Daphnia</i> | <i>longispina</i> | NA  | JQ861673 | NA   | JQ861673 | NA  | NA  |
| <i>Daphnia</i> | <i>longispina</i> | NA  | JQ861674 | NA   | JQ861674 | NA  | NA  |
| <i>Daphnia</i> | <i>longispina</i> | NA  | JQ861675 | NA   | JQ861675 | NA  | NA  |
| <i>Daphnia</i> | <i>longispina</i> | NA  | JQ861676 | NA   | JQ861676 | NA  | NA  |
| <i>Daphnia</i> | <i>longispina</i> | NA  | KF977693 | NA   | KF977693 | NA  | NA  |
| <i>Daphnia</i> | <i>longispina</i> | NA  | KF977687 | NA   | KF977687 | NA  | NA  |
| <i>Daphnia</i> | <i>longispina</i> | NA  | FJ178318 | NA   | FJ178318 | NA  | NA  |
| <i>Daphnia</i> | <i>longispina</i> | NA  | FJ178319 | NA   | FJ178319 | NA  | NA  |
| <i>Daphnia</i> | <i>longispina</i> | NA  | FJ178320 | NA   | FJ178320 | NA  | NA  |
| <i>Daphnia</i> | <i>longispina</i> | NA  | KP253085 | NA   | KP253085 | NA  | NA  |
| <i>Daphnia</i> | <i>longispina</i> | NA  | KP253086 | NA   | KP253086 | NA  | NA  |
| <i>Daphnia</i> | <i>longispina</i> | NA  | FJ178312 | NA   | FJ178312 | NA  | NA  |
| <i>Daphnia</i> | <i>longispina</i> | NA  | FJ178313 | NA   | FJ178313 | NA  | NA  |
| <i>Daphnia</i> | <i>longispina</i> | NA  | FJ178314 | NA   | FJ178314 | NA  | NA  |
| <i>Daphnia</i> | <i>longispina</i> | NA  | FJ178315 | NA   | FJ178315 | NA  | NA  |
| Genus          | Species           | 28s | 18s      | 5.8s | 12s      | COI | ND2 |
| <i>Daphnia</i> | <i>longispina</i> | NA  | FJ178316 | NA   | FJ178316 | NA  | NA  |
| <i>Daphnia</i> | <i>longispina</i> | NA  | FJ178317 | NA   | FJ178317 | NA  | NA  |
| <i>Daphnia</i> | <i>longispina</i> | NA  | FJ943791 | NA   | FJ943791 | NA  | NA  |
| <i>Daphnia</i> | <i>longispina</i> | NA  | FJ943792 | NA   | FJ943792 | NA  | NA  |
| <i>Daphnia</i> | <i>longispina</i> | NA  | EF375829 | NA   | EF375829 | NA  | NA  |
| <i>Daphnia</i> | <i>longispina</i> | NA  | FJ943793 | NA   | FJ943793 | NA  | NA  |
| <i>Daphnia</i> | <i>longispina</i> | NA  | FJ943794 | NA   | FJ943794 | NA  | NA  |
| <i>Daphnia</i> | <i>longispina</i> | NA  | FJ943795 | NA   | FJ943795 | NA  | NA  |
| <i>Daphnia</i> | <i>longispina</i> | NA  | KF977688 | NA   | KF977688 | NA  | NA  |
| <i>Daphnia</i> | <i>longispina</i> | NA  | KX027454 | NA   | KX027454 | NA  | NA  |
| <i>Daphnia</i> | <i>longispina</i> | NA  | KP253084 | NA   | KP253084 | NA  | NA  |
| <i>Daphnia</i> | <i>longispina</i> | NA  | KF977622 | NA   | KF977622 | NA  | NA  |
| <i>Daphnia</i> | <i>longispina</i> | NA  | KF977631 | NA   | KF977631 | NA  | NA  |
| <i>Daphnia</i> | <i>longispina</i> | NA  | KF977632 | NA   | KF977632 | NA  | NA  |
| <i>Daphnia</i> | <i>longispina</i> | NA  | KF977633 | NA   | KF977633 | NA  | NA  |
| <i>Daphnia</i> | <i>longispina</i> | NA  | KF977634 | NA   | KF977634 | NA  | NA  |
| <i>Daphnia</i> | <i>longispina</i> | NA  | KF977635 | NA   | KF977635 | NA  | NA  |
| <i>Daphnia</i> | <i>longispina</i> | NA  | KF977636 | NA   | KF977636 | NA  | NA  |
| <i>Daphnia</i> | <i>longispina</i> | NA  | KF977637 | NA   | KF977637 | NA  | NA  |
| <i>Daphnia</i> | <i>longispina</i> | NA  | KF977638 | NA   | KF977638 | NA  | NA  |
| <i>Daphnia</i> | <i>longispina</i> | NA  | KF977639 | NA   | KF977639 | NA  | NA  |
| <i>Daphnia</i> | <i>longispina</i> | NA  | KF977640 | NA   | KF977640 | NA  | NA  |
| <i>Daphnia</i> | <i>longispina</i> | NA  | KF977623 | NA   | KF977623 | NA  | NA  |
| <i>Daphnia</i> | <i>longispina</i> | NA  | KF977641 | NA   | KF977641 | NA  | NA  |
| <i>Daphnia</i> | <i>longispina</i> | NA  | KF977642 | NA   | KF977642 | NA  | NA  |
| <i>Daphnia</i> | <i>longispina</i> | NA  | KF977643 | NA   | KF977643 | NA  | NA  |
| <i>Daphnia</i> | <i>longispina</i> | NA  | KF977644 | NA   | KF977644 | NA  | NA  |
| <i>Daphnia</i> | <i>longispina</i> | NA  | KF977645 | NA   | KF977645 | NA  | NA  |
| <i>Daphnia</i> | <i>longispina</i> | NA  | KF977646 | NA   | KF977646 | NA  | NA  |
| <i>Daphnia</i> | <i>longispina</i> | NA  | KF977647 | NA   | KF977647 | NA  | NA  |
| <i>Daphnia</i> | <i>longispina</i> | NA  | KF977648 | NA   | KF977648 | NA  | NA  |
| <i>Daphnia</i> | <i>longispina</i> | NA  | KF977649 | NA   | KF977649 | NA  | NA  |
| <i>Daphnia</i> | <i>longispina</i> | NA  | KF977650 | NA   | KF977650 | NA  | NA  |

|                |                   |            |            |             |            |            |            |
|----------------|-------------------|------------|------------|-------------|------------|------------|------------|
| <i>Daphnia</i> | <i>longispina</i> | NA         | KF977624   | NA          | KF977624   | NA         | NA         |
| <i>Daphnia</i> | <i>longispina</i> | NA         | KF977651   | NA          | KF977651   | NA         | NA         |
| <i>Daphnia</i> | <i>longispina</i> | NA         | KF977652   | NA          | KF977652   | NA         | NA         |
| <i>Daphnia</i> | <i>longispina</i> | NA         | KF977653   | NA          | KF977653   | NA         | NA         |
| <i>Daphnia</i> | <i>longispina</i> | NA         | KF977654   | NA          | KF977654   | NA         | NA         |
| <i>Daphnia</i> | <i>longispina</i> | NA         | KF977655   | NA          | KF977655   | NA         | NA         |
| <i>Daphnia</i> | <i>longispina</i> | NA         | KF977656   | NA          | KF977656   | NA         | NA         |
| <i>Daphnia</i> | <i>longispina</i> | NA         | KF977657   | NA          | KF977657   | NA         | NA         |
| <b>Genus</b>   | <b>Species</b>    | <b>28s</b> | <b>18s</b> | <b>5.8s</b> | <b>12s</b> | <b>COI</b> | <b>ND2</b> |
| <i>Daphnia</i> | <i>longispina</i> | NA         | KF977658   | NA          | KF977658   | NA         | NA         |
| <i>Daphnia</i> | <i>longispina</i> | NA         | KF977659   | NA          | KF977659   | NA         | NA         |
| <i>Daphnia</i> | <i>longispina</i> | NA         | KF977660   | NA          | KF977660   | NA         | NA         |
| <i>Daphnia</i> | <i>longispina</i> | NA         | KF977625   | NA          | KF977625   | NA         | NA         |
| <i>Daphnia</i> | <i>longispina</i> | NA         | KF977661   | NA          | KF977661   | NA         | NA         |
| <i>Daphnia</i> | <i>longispina</i> | NA         | KF977662   | NA          | KF977662   | NA         | NA         |
| <i>Daphnia</i> | <i>longispina</i> | NA         | KF977663   | NA          | KF977663   | NA         | NA         |
| <i>Daphnia</i> | <i>longispina</i> | NA         | KF977664   | NA          | KF977664   | NA         | NA         |
| <i>Daphnia</i> | <i>longispina</i> | NA         | KF977665   | NA          | KF977665   | NA         | NA         |
| <i>Daphnia</i> | <i>longispina</i> | NA         | KF977666   | NA          | KF977666   | NA         | NA         |
| <i>Daphnia</i> | <i>longispina</i> | NA         | KF977667   | NA          | KF977667   | NA         | NA         |
| <i>Daphnia</i> | <i>longispina</i> | NA         | KF977668   | NA          | KF977668   | NA         | NA         |
| <i>Daphnia</i> | <i>longispina</i> | NA         | KF977669   | NA          | KF977669   | NA         | NA         |
| <i>Daphnia</i> | <i>longispina</i> | NA         | KF977670   | NA          | KF977670   | NA         | NA         |
| <i>Daphnia</i> | <i>longispina</i> | NA         | KF977626   | NA          | KF977626   | NA         | NA         |
| <i>Daphnia</i> | <i>longispina</i> | NA         | KF977671   | NA          | KF977671   | NA         | NA         |
| <i>Daphnia</i> | <i>longispina</i> | NA         | KF977672   | NA          | KF977672   | NA         | NA         |
| <i>Daphnia</i> | <i>longispina</i> | NA         | KF977673   | NA          | KF977673   | NA         | NA         |
| <i>Daphnia</i> | <i>longispina</i> | NA         | KF977674   | NA          | KF977674   | NA         | NA         |
| <i>Daphnia</i> | <i>longispina</i> | NA         | KF977675   | NA          | KF977675   | NA         | NA         |
| <i>Daphnia</i> | <i>longispina</i> | NA         | KF977676   | NA          | KF977676   | NA         | NA         |
| <i>Daphnia</i> | <i>longispina</i> | NA         | KF977677   | NA          | KF977677   | NA         | NA         |
| <i>Daphnia</i> | <i>longispina</i> | NA         | KF977678   | NA          | KF977678   | NA         | NA         |
| <i>Daphnia</i> | <i>longispina</i> | NA         | KF977679   | NA          | KF977679   | NA         | NA         |
| <i>Daphnia</i> | <i>longispina</i> | NA         | KF977680   | NA          | KF977680   | NA         | NA         |
| <i>Daphnia</i> | <i>longispina</i> | NA         | KF977627   | NA          | KF977627   | NA         | NA         |
| <i>Daphnia</i> | <i>longispina</i> | NA         | KF977681   | NA          | KF977681   | NA         | NA         |
| <i>Daphnia</i> | <i>longispina</i> | NA         | KF977682   | NA          | KF977682   | NA         | NA         |
| <i>Daphnia</i> | <i>longispina</i> | NA         | KF977628   | NA          | KF977628   | NA         | NA         |
| <i>Daphnia</i> | <i>longispina</i> | NA         | KF977629   | NA          | KF977629   | NA         | NA         |
| <i>Daphnia</i> | <i>longispina</i> | NA         | KF977630   | NA          | KF977630   | NA         | NA         |
| <i>Daphnia</i> | <i>longispina</i> | NA         | JX134332   | NA          | JX134332   | NA         | NA         |
| <i>Daphnia</i> | <i>longispina</i> | NA         | KF977690   | NA          | KF977690   | NA         | NA         |
| <i>Daphnia</i> | <i>longispina</i> | NA         | FJ178321   | NA          | FJ178321   | NA         | NA         |
| <i>Daphnia</i> | <i>longispina</i> | NA         | KY196431   | NA          | KY196431   | NA         | NA         |
| <i>Daphnia</i> | <i>longispina</i> | NA         | KY196423   | NA          | KY196423   | NA         | NA         |
| <i>Daphnia</i> | <i>longispina</i> | NA         | KY196434   | NA          | KY196434   | NA         | NA         |
| <i>Daphnia</i> | <i>longispina</i> | NA         | KY196424   | NA          | KY196424   | NA         | NA         |
| <i>Daphnia</i> | <i>longispina</i> | NA         | GQ422140   | NA          | GQ422140   | NA         | NA         |
| <i>Daphnia</i> | <i>longispina</i> | NA         | GQ422142   | NA          | GQ422142   | NA         | NA         |
| <i>Daphnia</i> | <i>longispina</i> | NA         | GQ422141   | NA          | GQ422141   | NA         | NA         |
| <b>Genus</b>   | <b>Species</b>    | <b>28s</b> | <b>18s</b> | <b>5.8s</b> | <b>12s</b> | <b>COI</b> | <b>ND2</b> |
| <i>Daphnia</i> | <i>longispina</i> | NA         | JN903662   | NA          | JN903662   | NA         | NA         |
| <i>Daphnia</i> | <i>longispina</i> | NA         | JN903663   | NA          | JN903663   | NA         | NA         |
| <i>Daphnia</i> | <i>longispina</i> | NA         | JN903664   | NA          | JN903664   | NA         | NA         |
| <i>Daphnia</i> | <i>longispina</i> | NA         | JN903665   | NA          | JN903665   | NA         | NA         |
| <i>Daphnia</i> | <i>longispina</i> | NA         | KF977695   | NA          | KF977695   | NA         | NA         |
| <i>Daphnia</i> | <i>longispina</i> | NA         | KF977696   | NA          | KF977696   | NA         | NA         |
| <i>Daphnia</i> | <i>longispina</i> | NA         | KF977692   | NA          | KF977692   | NA         | NA         |
| <i>Daphnia</i> | <i>longispina</i> | NA         | JX134333   | NA          | JX134333   | NA         | NA         |
| <i>Daphnia</i> | <i>longispina</i> | NA         | JX134334   | NA          | JX134334   | NA         | NA         |
| <i>Daphnia</i> | <i>longispina</i> | NA         | JX134335   | NA          | JX134335   | NA         | NA         |
| <i>Daphnia</i> | <i>longispina</i> | NA         | DQ536400   | NA          | DQ536400   | NA         | NA         |
| <i>Daphnia</i> | <i>longispina</i> | NA         | JX134336   | NA          | JX134336   | NA         | NA         |
| <i>Daphnia</i> | <i>longispina</i> | NA         | JX134337   | NA          | JX134337   | NA         | NA         |
| <i>Daphnia</i> | <i>longispina</i> | NA         | JX134338   | NA          | JX134338   | NA         | NA         |

|                |                   |            |            |             |            |            |            |
|----------------|-------------------|------------|------------|-------------|------------|------------|------------|
| <i>Daphnia</i> | <i>longispina</i> | NA         | KF977691   | NA          | KF977691   | NA         | NA         |
| <i>Daphnia</i> | <i>longispina</i> | NA         | KF977683   | NA          | KF977683   | NA         | NA         |
| <i>Daphnia</i> | <i>longispina</i> | NA         | FJ178322   | NA          | FJ178322   | NA         | NA         |
| <i>Daphnia</i> | <i>longispina</i> | NA         | FJ178323   | NA          | FJ178323   | NA         | NA         |
| <i>Daphnia</i> | <i>longispina</i> | NA         | FJ178324   | NA          | FJ178324   | NA         | NA         |
| <i>Daphnia</i> | <i>longispina</i> | NA         | FJ178327   | NA          | FJ178327   | NA         | NA         |
| <i>Daphnia</i> | <i>longispina</i> | NA         | FJ178328   | NA          | FJ178328   | NA         | NA         |
| <i>Daphnia</i> | <i>longispina</i> | NA         | FJ178329   | NA          | FJ178329   | NA         | NA         |
| <i>Daphnia</i> | <i>longispina</i> | NA         | FJ178325   | NA          | FJ178325   | NA         | NA         |
| <i>Daphnia</i> | <i>longispina</i> | NA         | FJ178326   | NA          | FJ178326   | NA         | NA         |
| <i>Daphnia</i> | <i>longispina</i> | NA         | FJ178330   | NA          | FJ178330   | NA         | NA         |
| <i>Daphnia</i> | <i>longispina</i> | NA         | JX134339   | NA          | JX134339   | NA         | NA         |
| <i>Daphnia</i> | <i>longispina</i> | NA         | JX134340   | NA          | JX134340   | NA         | NA         |
| <i>Daphnia</i> | <i>longispina</i> | NA         | JX134341   | NA          | JX134341   | NA         | NA         |
| <i>Daphnia</i> | <i>longispina</i> | NA         | JX134342   | NA          | JX134342   | NA         | NA         |
| <i>Daphnia</i> | <i>longispina</i> | NA         | FJ178331   | NA          | FJ178331   | NA         | NA         |
| <i>Daphnia</i> | <i>longispina</i> | NA         | JQ861665   | NA          | JQ861665   | NA         | NA         |
| <i>Daphnia</i> | <i>longispina</i> | NA         | JQ861666   | NA          | JQ861666   | NA         | NA         |
| <i>Daphnia</i> | <i>longispina</i> | NA         | KF977684   | NA          | KF977684   | NA         | NA         |
| <i>Daphnia</i> | <i>longispina</i> | NA         | JX134343   | NA          | JX134343   | NA         | NA         |
| <i>Daphnia</i> | <i>longispina</i> | NA         | JX134344   | NA          | JX134344   | NA         | NA         |
| <i>Daphnia</i> | <i>longispina</i> | NA         | JX134345   | NA          | JX134345   | NA         | NA         |
| <i>Daphnia</i> | <i>longispina</i> | NA         | JX134346   | NA          | JX134346   | NA         | NA         |
| <i>Daphnia</i> | <i>longispina</i> | NA         | JX134347   | NA          | JX134347   | NA         | NA         |
| <i>Daphnia</i> | <i>longispina</i> | NA         | JX134348   | NA          | JX134348   | NA         | NA         |
| <i>Daphnia</i> | <i>longispina</i> | NA         | FJ943787   | NA          | FJ943787   | NA         | NA         |
| <i>Daphnia</i> | <i>longispina</i> | NA         | FJ943788   | NA          | FJ943788   | NA         | NA         |
| <b>Genus</b>   | <b>Species</b>    | <b>28s</b> | <b>18s</b> | <b>5.8s</b> | <b>12s</b> | <b>COI</b> | <b>ND2</b> |
| <i>Daphnia</i> | <i>longispina</i> | NA         | FJ943789   | NA          | FJ943789   | NA         | NA         |
| <i>Daphnia</i> | <i>longispina</i> | NA         | FJ943790   | NA          | FJ943790   | NA         | NA         |
| <i>Daphnia</i> | <i>longispina</i> | NA         | JX134350   | NA          | JX134350   | NA         | NA         |
| <i>Daphnia</i> | <i>longispina</i> | NA         | JX134351   | NA          | JX134351   | NA         | NA         |
| <i>Daphnia</i> | <i>longispina</i> | NA         | KF977685   | NA          | KF977685   | NA         | NA         |
| <i>Daphnia</i> | <i>longispina</i> | NA         | JX134352   | NA          | JX134352   | NA         | NA         |
| <i>Daphnia</i> | <i>longispina</i> | NA         | JX134353   | NA          | JX134353   | NA         | NA         |
| <i>Daphnia</i> | <i>longispina</i> | NA         | JX134354   | NA          | JX134354   | NA         | NA         |
| <i>Daphnia</i> | <i>longispina</i> | NA         | JX134355   | NA          | JX134355   | NA         | NA         |
| <i>Daphnia</i> | <i>longispina</i> | NA         | JX134356   | NA          | JX134356   | NA         | NA         |
| <i>Daphnia</i> | <i>longispina</i> | NA         | JX134357   | NA          | JX134357   | NA         | NA         |
| <i>Daphnia</i> | <i>longispina</i> | NA         | JX134358   | NA          | JX134358   | NA         | NA         |
| <i>Daphnia</i> | <i>longispina</i> | NA         | KJ024375   | NA          | KJ024375   | NA         | NA         |
| <i>Daphnia</i> | <i>longispina</i> | NA         | FJ943798   | NA          | FJ943798   | NA         | NA         |
| <i>Daphnia</i> | <i>longispina</i> | NA         | FJ943799   | NA          | FJ943799   | NA         | NA         |
| <i>Daphnia</i> | <i>longispina</i> | NA         | FJ178333   | NA          | FJ178333   | NA         | NA         |
| <i>Daphnia</i> | <i>longispina</i> | NA         | FJ178332   | NA          | FJ178332   | NA         | NA         |
| <i>Daphnia</i> | <i>longispina</i> | NA         | FJ178334   | NA          | FJ178334   | NA         | NA         |
| <i>Daphnia</i> | <i>longispina</i> | NA         | FJ178335   | NA          | FJ178335   | NA         | NA         |
| <i>Daphnia</i> | <i>longispina</i> | NA         | FJ178336   | NA          | FJ178336   | NA         | NA         |
| <i>Daphnia</i> | <i>longispina</i> | NA         | AY730371   | NA          | AY730371   | NA         | NA         |
| <i>Daphnia</i> | <i>longispina</i> | NA         | KF977686   | NA          | KF977686   | NA         | NA         |
| <i>Daphnia</i> | <i>longispina</i> | NA         | JQ861667   | NA          | JQ861667   | NA         | NA         |
| <i>Daphnia</i> | <i>longispina</i> | NA         | JQ861668   | NA          | JQ861668   | NA         | NA         |
| <i>Daphnia</i> | <i>longispina</i> | NA         | FJ178337   | NA          | FJ178337   | NA         | NA         |
| <i>Daphnia</i> | <i>longispina</i> | NA         | FJ178338   | NA          | FJ178338   | NA         | NA         |
| <i>Daphnia</i> | <i>longispina</i> | NA         | JX134322   | NA          | JX134322   | NA         | NA         |
| <i>Daphnia</i> | <i>longispina</i> | NA         | JX134323   | NA          | JX134323   | NA         | NA         |
| <i>Daphnia</i> | <i>longispina</i> | NA         | JX134324   | NA          | JX134324   | NA         | NA         |
| <i>Daphnia</i> | <i>longispina</i> | NA         | FJ178339   | NA          | FJ178339   | NA         | NA         |
| <i>Daphnia</i> | <i>longispina</i> | NA         | FJ178340   | NA          | FJ178340   | NA         | NA         |
| <i>Daphnia</i> | <i>longispina</i> | NA         | AY730370   | NA          | AY730370   | NA         | NA         |
| <i>Daphnia</i> | <i>longispina</i> | NA         | KF977694   | NA          | KF977694   | NA         | NA         |
| <i>Daphnia</i> | <i>longispina</i> | NA         | JQ861664   | NA          | JQ861664   | NA         | NA         |
| <i>Daphnia</i> | <i>longispina</i> | NA         | JQ861663   | NA          | JQ861663   | NA         | NA         |
| <i>Daphnia</i> | <i>longispina</i> | NA         | JX134325   | NA          | JX134325   | NA         | NA         |
| <i>Daphnia</i> | <i>longispina</i> | NA         | JX134326   | NA          | JX134326   | NA         | NA         |

|                |                   |              |            |             |            |            |            |
|----------------|-------------------|--------------|------------|-------------|------------|------------|------------|
| <i>Daphnia</i> | <i>longispina</i> | NA           | JX134327   | NA          | JX134327   | NA         | NA         |
| <i>Daphnia</i> | <i>longispina</i> | NA           | JX134349   | NA          | JX134349   | NA         | NA         |
| <i>Daphnia</i> | <i>longispina</i> | NA           | FJ178343   | NA          | FJ178343   | NA         | NA         |
| <i>Daphnia</i> | <i>longispina</i> | NA           | FJ178341   | NA          | FJ178341   | NA         | NA         |
| <b>Genus</b>   | <b>Species</b>    | <b>28s</b>   | <b>18s</b> | <b>5.8s</b> | <b>12s</b> | <b>COI</b> | <b>ND2</b> |
| <i>Daphnia</i> | <i>longispina</i> | NA           | FJ178342   | NA          | FJ178342   | NA         | NA         |
| <i>Daphnia</i> | <i>longispina</i> | NA           | EF375843   | NA          | EF375843   | NA         | NA         |
| <i>Daphnia</i> | <i>longispina</i> | NA           | JN903666   | NA          | JN903666   | NA         | NA         |
| <i>Daphnia</i> | <i>longispina</i> | NA           | JN903667   | NA          | JN903667   | NA         | NA         |
| <i>Daphnia</i> | <i>longispina</i> | NA           | JN903668   | NA          | JN903668   | NA         | NA         |
| <i>Daphnia</i> | <i>longispina</i> | NA           | JN903669   | NA          | JN903669   | NA         | NA         |
| <i>Daphnia</i> | <i>longispina</i> | NA           | JN903670   | NA          | JN903670   | NA         | NA         |
| <i>Daphnia</i> | <i>longispina</i> | NA           | JN903671   | NA          | JN903671   | NA         | NA         |
| <i>Daphnia</i> | <i>longispina</i> | NA           | JN903672   | NA          | JN903672   | NA         | NA         |
| <i>Daphnia</i> | <i>longispina</i> | NA           | JN903673   | NA          | JN903673   | NA         | NA         |
| <i>Daphnia</i> | <i>longispina</i> | NA           | JN903674   | NA          | JN903674   | NA         | NA         |
| <i>Daphnia</i> | <i>longispina</i> | NA           | FJ178344   | NA          | FJ178344   | NA         | NA         |
| <i>Daphnia</i> | <i>longispina</i> | NA           | FJ178345   | NA          | FJ178345   | NA         | NA         |
| <i>Daphnia</i> | <i>longispina</i> | NA           | JX134328   | NA          | JX134328   | NA         | NA         |
| <i>Daphnia</i> | <i>longispina</i> | NA           | JX134329   | NA          | JX134329   | NA         | NA         |
| <i>Daphnia</i> | <i>lumholtzi</i>  | NA           | U34739     | NA          | U34739     | AY921417   | DQ845278   |
| <i>Daphnia</i> | <i>lumholtzi</i>  | NA           | AY921466   | NA          | AY921466   | AF308970   | NA         |
| <i>Daphnia</i> | <i>lumholtzi</i>  | NA           | NA         | NA          | NA         | AF308974   | NA         |
| <i>Daphnia</i> | <i>lumholtzi</i>  | NA           | NA         | NA          | NA         | KC154288   | NA         |
| <i>Daphnia</i> | <i>lumholtzi</i>  | NA           | NA         | NA          | NA         | KC154289   | NA         |
| <i>Daphnia</i> | <i>lumholtzi</i>  | NA           | NA         | NA          | NA         | KC154290   | NA         |
| <i>Daphnia</i> | <i>lumholtzi</i>  | NA           | NA         | NA          | NA         | KC154291   | NA         |
| <i>Daphnia</i> | <i>lumholtzi</i>  | NA           | NA         | NA          | NA         | KC154292   | NA         |
| <i>Daphnia</i> | <i>lumholtzi</i>  | NA           | NA         | NA          | NA         | KC154293   | NA         |
| <i>Daphnia</i> | <i>lumholtzi</i>  | NA           | NA         | NA          | NA         | EU702131   | NA         |
| <i>Daphnia</i> | <i>lumholtzi</i>  | NA           | NA         | NA          | NA         | EU702130   | NA         |
| <i>Daphnia</i> | <i>lumholtzi</i>  | NA           | NA         | NA          | NA         | EU702129   | NA         |
| <i>Daphnia</i> | <i>lumholtzi</i>  | NA           | NA         | NA          | NA         | EU702128   | NA         |
| <i>Daphnia</i> | <i>lumholtzi</i>  | NA           | NA         | NA          | NA         | EU702127   | NA         |
| <i>Daphnia</i> | <i>magna</i>      | AF532883     | U34738     | NA          | U34738     | KF993366   | DQ132627   |
| <i>Daphnia</i> | <i>magna</i>      | LRGB01004652 | DQ116603   | NA          | DQ116603   | MG544040   | NA         |
| <i>Daphnia</i> | <i>magna</i>      | LRGB01004813 | AY921467   | NA          | AY921467   | MG544041   | NA         |
| <i>Daphnia</i> | <i>magna</i>      | LRGB01009666 | MH683616   | NA          | JN903681   | MG544042   | NA         |
| <i>Daphnia</i> | <i>magna</i>      | LRGB01015620 | MH683617   | NA          | JN903682   | MG544053   | NA         |
| <i>Daphnia</i> | <i>magna</i>      | LRGB01016306 | MH683618   | NA          | U13908     | MG544054   | NA         |
| <i>Daphnia</i> | <i>magna</i>      | LRGB01019659 | MH683619   | NA          | JN903683   | MG544055   | NA         |
| <i>Daphnia</i> | <i>magna</i>      | LRGB01023865 | MH683620   | NA          | JN903684   | MG544062   | NA         |
| <i>Daphnia</i> | <i>magna</i>      | LRGB01000753 | JN903681   | NA          | NA         | MG544063   | NA         |
| <i>Daphnia</i> | <i>magna</i>      | LRGB01002082 | JN903682   | NA          | NA         | MG544064   | NA         |
| <i>Daphnia</i> | <i>magna</i>      | NA           | KM244710   | NA          | NA         | JF821194   | NA         |
| <i>Daphnia</i> | <i>magna</i>      | NA           | MH683621   | NA          | NA         | KJ461678   | NA         |
| <b>Genus</b>   | <b>Species</b>    | <b>28s</b>   | <b>18s</b> | <b>5.8s</b> | <b>12s</b> | <b>COI</b> | <b>ND2</b> |
| <i>Daphnia</i> | <i>magna</i>      | NA           | MH683622   | NA          | NA         | KC479039   | NA         |
| <i>Daphnia</i> | <i>magna</i>      | NA           | MH683624   | NA          | NA         | KF993373   | NA         |
| <i>Daphnia</i> | <i>magna</i>      | NA           | MH683623   | NA          | NA         | DQ166849   | NA         |
| <i>Daphnia</i> | <i>magna</i>      | NA           | MH683625   | NA          | NA         | JF750768   | NA         |
| <i>Daphnia</i> | <i>magna</i>      | NA           | MH683626   | NA          | NA         | JF750769   | NA         |
| <i>Daphnia</i> | <i>magna</i>      | NA           | MH683627   | NA          | NA         | AY803040   | NA         |
| <i>Daphnia</i> | <i>magna</i>      | NA           | MH683628   | NA          | NA         | AY803049   | NA         |
| <i>Daphnia</i> | <i>magna</i>      | NA           | MH683629   | NA          | NA         | KP668787   | NA         |
| <i>Daphnia</i> | <i>magna</i>      | NA           | MH683630   | NA          | NA         | AY803056   | NA         |
| <i>Daphnia</i> | <i>magna</i>      | NA           | MH683631   | NA          | NA         | KP668788   | NA         |
| <i>Daphnia</i> | <i>magna</i>      | NA           | MH683632   | NA          | NA         | AY803050   | NA         |
| <i>Daphnia</i> | <i>magna</i>      | NA           | MH683633   | NA          | NA         | KP668789   | NA         |
| <i>Daphnia</i> | <i>magna</i>      | NA           | MH683635   | NA          | NA         | AY803051   | NA         |
| <i>Daphnia</i> | <i>magna</i>      | NA           | MH683636   | NA          | NA         | KP668790   | NA         |
| <i>Daphnia</i> | <i>magna</i>      | NA           | MH683634   | NA          | NA         | AY803052   | NA         |
| <i>Daphnia</i> | <i>magna</i>      | NA           | MH683638   | NA          | NA         | KP668791   | NA         |
| <i>Daphnia</i> | <i>magna</i>      | NA           | MH683637   | NA          | NA         | AY803053   | NA         |
| <i>Daphnia</i> | <i>magna</i>      | NA           | MH683639   | NA          | NA         | KP668792   | NA         |

| <i>Daphnia</i> | <i>magna</i> | NA  | MH683640  | NA   | NA  | AY803054 | NA  |
|----------------|--------------|-----|-----------|------|-----|----------|-----|
| <i>Daphnia</i> | <i>magna</i> | NA  | MH683641  | NA   | NA  | KP668793 | NA  |
| <i>Daphnia</i> | <i>magna</i> | NA  | MH683642  | NA   | NA  | AY803055 | NA  |
| <i>Daphnia</i> | <i>magna</i> | NA  | MH683643  | NA   | NA  | KP668794 | NA  |
| <i>Daphnia</i> | <i>magna</i> | NA  | MH683644  | NA   | NA  | AY803057 | NA  |
| <i>Daphnia</i> | <i>magna</i> | NA  | MH683645  | NA   | NA  | KP668795 | NA  |
| <i>Daphnia</i> | <i>magna</i> | NA  | MH683646  | NA   | NA  | AY803058 | NA  |
| <i>Daphnia</i> | <i>magna</i> | NA  | MH683647  | NA   | NA  | AY803041 | NA  |
| <i>Daphnia</i> | <i>magna</i> | NA  | MH683648  | NA   | NA  | KP668796 | NA  |
| <i>Daphnia</i> | <i>magna</i> | NA  | MH683649  | NA   | NA  | AY803059 | NA  |
| <i>Daphnia</i> | <i>magna</i> | NA  | MH683650  | NA   | NA  | KP668797 | NA  |
| <i>Daphnia</i> | <i>magna</i> | NA  | MH683651  | NA   | NA  | AY803060 | NA  |
| <i>Daphnia</i> | <i>magna</i> | NA  | MH683652  | NA   | NA  | KP668798 | NA  |
| <i>Daphnia</i> | <i>magna</i> | NA  | MH683653  | NA   | NA  | AY803061 | NA  |
| <i>Daphnia</i> | <i>magna</i> | NA  | MH683654  | NA   | NA  | KP668799 | NA  |
| <i>Daphnia</i> | <i>magna</i> | NA  | MH683655  | NA   | NA  | AY803062 | NA  |
| <i>Daphnia</i> | <i>magna</i> | NA  | MH683656  | NA   | NA  | AY803063 | NA  |
| <i>Daphnia</i> | <i>magna</i> | NA  | MH683657  | NA   | NA  | AY803064 | NA  |
| <i>Daphnia</i> | <i>magna</i> | NA  | MH683658  | NA   | NA  | AY803065 | NA  |
| <i>Daphnia</i> | <i>magna</i> | NA  | MH683659  | NA   | NA  | AY803066 | NA  |
| <i>Daphnia</i> | <i>magna</i> | NA  | MH683660  | NA   | NA  | AY803067 | NA  |
| <i>Daphnia</i> | <i>magna</i> | NA  | MH683661  | NA   | NA  | AY803068 | NA  |
| <i>Daphnia</i> | <i>magna</i> | NA  | MH683662  | NA   | NA  | AY803042 | NA  |
| Genus          | Species      | 28s | 18s       | 5.8s | 12s | COI      | ND2 |
| <i>Daphnia</i> | <i>magna</i> | NA  | MH683663  | NA   | NA  | AY803069 | NA  |
| <i>Daphnia</i> | <i>magna</i> | NA  | MH683664  | NA   | NA  | AY803070 | NA  |
| <i>Daphnia</i> | <i>magna</i> | NA  | MH683665  | NA   | NA  | AY803071 | NA  |
| <i>Daphnia</i> | <i>magna</i> | NA  | MH683666  | NA   | NA  | AY803072 | NA  |
| <i>Daphnia</i> | <i>magna</i> | NA  | MH683667  | NA   | NA  | AY803073 | NA  |
| <i>Daphnia</i> | <i>magna</i> | NA  | MH683668  | NA   | NA  | AY803074 | NA  |
| <i>Daphnia</i> | <i>magna</i> | NA  | MH683669  | NA   | NA  | AY803075 | NA  |
| <i>Daphnia</i> | <i>magna</i> | NA  | MH683670  | NA   | NA  | AY803076 | NA  |
| <i>Daphnia</i> | <i>magna</i> | NA  | MH683671  | NA   | NA  | AY803077 | NA  |
| <i>Daphnia</i> | <i>magna</i> | NA  | U13908    | NA   | NA  | AY803078 | NA  |
| <i>Daphnia</i> | <i>magna</i> | NA  | JN903683  | NA   | NA  | AY803043 | NA  |
| <i>Daphnia</i> | <i>magna</i> | NA  | JN903684  | NA   | NA  | AY803044 | NA  |
| <i>Daphnia</i> | <i>magna</i> | NA  | NC_026914 | NA   | NA  | AY803045 | NA  |
| <i>Daphnia</i> | <i>magna</i> | NA  | KP296147  | NA   | NA  | AY803046 | NA  |
| <i>Daphnia</i> | <i>magna</i> | NA  | NA        | NA   | NA  | AY803047 | NA  |
| <i>Daphnia</i> | <i>magna</i> | NA  | NA        | NA   | NA  | AY803048 | NA  |
| <i>Daphnia</i> | <i>magna</i> | NA  | NA        | NA   | NA  | AY803081 | NA  |
| <i>Daphnia</i> | <i>magna</i> | NA  | NA        | NA   | NA  | JF750770 | NA  |
| <i>Daphnia</i> | <i>magna</i> | NA  | NA        | NA   | NA  | JF750771 | NA  |
| <i>Daphnia</i> | <i>magna</i> | NA  | NA        | NA   | NA  | AY803079 | NA  |
| <i>Daphnia</i> | <i>magna</i> | NA  | NA        | NA   | NA  | AY803080 | NA  |
| <i>Daphnia</i> | <i>magna</i> | NA  | NA        | NA   | NA  | JQ280123 | NA  |
| <i>Daphnia</i> | <i>magna</i> | NA  | NA        | NA   | NA  | JQ280119 | NA  |
| <i>Daphnia</i> | <i>magna</i> | NA  | NA        | NA   | NA  | JQ280127 | NA  |
| <i>Daphnia</i> | <i>magna</i> | NA  | NA        | NA   | NA  | JQ280120 | NA  |
| <i>Daphnia</i> | <i>magna</i> | NA  | NA        | NA   | NA  | JQ280128 | NA  |
| <i>Daphnia</i> | <i>magna</i> | NA  | NA        | NA   | NA  | JQ280124 | NA  |
| <i>Daphnia</i> | <i>magna</i> | NA  | NA        | NA   | NA  | JQ280125 | NA  |
| <i>Daphnia</i> | <i>magna</i> | NA  | NA        | NA   | NA  | JQ280117 | NA  |
| <i>Daphnia</i> | <i>magna</i> | NA  | NA        | NA   | NA  | JQ280118 | NA  |
| <i>Daphnia</i> | <i>magna</i> | NA  | NA        | NA   | NA  | JQ280126 | NA  |
| <i>Daphnia</i> | <i>magna</i> | NA  | NA        | NA   | NA  | JQ280106 | NA  |
| <i>Daphnia</i> | <i>magna</i> | NA  | NA        | NA   | NA  | JQ280114 | NA  |
| <i>Daphnia</i> | <i>magna</i> | NA  | NA        | NA   | NA  | JQ280122 | NA  |
| <i>Daphnia</i> | <i>magna</i> | NA  | NA        | NA   | NA  | JQ280115 | NA  |
| <i>Daphnia</i> | <i>magna</i> | NA  | NA        | NA   | NA  | JQ280121 | NA  |
| <i>Daphnia</i> | <i>magna</i> | NA  | NA        | NA   | NA  | JQ280107 | NA  |
| <i>Daphnia</i> | <i>magna</i> | NA  | NA        | NA   | NA  | JQ280108 | NA  |
| <i>Daphnia</i> | <i>magna</i> | NA  | NA        | NA   | NA  | JQ280109 | NA  |
| <i>Daphnia</i> | <i>magna</i> | NA  | NA        | NA   | NA  | JQ280112 | NA  |
| <i>Daphnia</i> | <i>magna</i> | NA  | NA        | NA   | NA  | JQ280113 | NA  |

| Genus          | Species      | 28s | 18s | 5.8s | 12s | COI      | ND2 |
|----------------|--------------|-----|-----|------|-----|----------|-----|
| <i>Daphnia</i> | <i>magna</i> | NA  | NA  | NA   | NA  | JQ280116 | NA  |
| <i>Daphnia</i> | <i>magna</i> | NA  | NA  | NA   | NA  | JQ280110 | NA  |
| <i>Daphnia</i> | <i>magna</i> | NA  | NA  | NA   | NA  | JQ280111 | NA  |
| <i>Daphnia</i> | <i>magna</i> | NA  | NA  | NA   | NA  | JQ280143 | NA  |
| <i>Daphnia</i> | <i>magna</i> | NA  | NA  | NA   | NA  | JQ280144 | NA  |
| <i>Daphnia</i> | <i>magna</i> | NA  | NA  | NA   | NA  | JQ280145 | NA  |
| <i>Daphnia</i> | <i>magna</i> | NA  | NA  | NA   | NA  | JQ280140 | NA  |
| <i>Daphnia</i> | <i>magna</i> | NA  | NA  | NA   | NA  | JQ280141 | NA  |
| <i>Daphnia</i> | <i>magna</i> | NA  | NA  | NA   | NA  | JQ280142 | NA  |
| <i>Daphnia</i> | <i>magna</i> | NA  | NA  | NA   | NA  | JQ280133 | NA  |
| <i>Daphnia</i> | <i>magna</i> | NA  | NA  | NA   | NA  | JQ280134 | NA  |
| <i>Daphnia</i> | <i>magna</i> | NA  | NA  | NA   | NA  | JQ280135 | NA  |
| <i>Daphnia</i> | <i>magna</i> | NA  | NA  | NA   | NA  | JQ280136 | NA  |
| <i>Daphnia</i> | <i>magna</i> | NA  | NA  | NA   | NA  | JQ280137 | NA  |
| <i>Daphnia</i> | <i>magna</i> | NA  | NA  | NA   | NA  | JQ280138 | NA  |
| <i>Daphnia</i> | <i>magna</i> | NA  | NA  | NA   | NA  | JQ280139 | NA  |
| <i>Daphnia</i> | <i>magna</i> | NA  | NA  | NA   | NA  | JQ280129 | NA  |
| <i>Daphnia</i> | <i>magna</i> | NA  | NA  | NA   | NA  | JQ280130 | NA  |
| <i>Daphnia</i> | <i>magna</i> | NA  | NA  | NA   | NA  | JQ280131 | NA  |
| <i>Daphnia</i> | <i>magna</i> | NA  | NA  | NA   | NA  | JQ280132 | NA  |
| <i>Daphnia</i> | <i>magna</i> | NA  | NA  | NA   | NA  | JQ279821 | NA  |
| <i>Daphnia</i> | <i>magna</i> | NA  | NA  | NA   | NA  | JQ279824 | NA  |
| <i>Daphnia</i> | <i>magna</i> | NA  | NA  | NA   | NA  | JQ279825 | NA  |
| <i>Daphnia</i> | <i>magna</i> | NA  | NA  | NA   | NA  | JQ279826 | NA  |
| <i>Daphnia</i> | <i>magna</i> | NA  | NA  | NA   | NA  | JQ279827 | NA  |
| <i>Daphnia</i> | <i>magna</i> | NA  | NA  | NA   | NA  | JQ279828 | NA  |
| <i>Daphnia</i> | <i>magna</i> | NA  | NA  | NA   | NA  | JQ279829 | NA  |
| <i>Daphnia</i> | <i>magna</i> | NA  | NA  | NA   | NA  | JQ279830 | NA  |
| <i>Daphnia</i> | <i>magna</i> | NA  | NA  | NA   | NA  | JQ279831 | NA  |
| <i>Daphnia</i> | <i>magna</i> | NA  | NA  | NA   | NA  | JQ279832 | NA  |
| <i>Daphnia</i> | <i>magna</i> | NA  | NA  | NA   | NA  | JQ279833 | NA  |
| <i>Daphnia</i> | <i>magna</i> | NA  | NA  | NA   | NA  | JQ279834 | NA  |
| <i>Daphnia</i> | <i>magna</i> | NA  | NA  | NA   | NA  | JQ279835 | NA  |
| <i>Daphnia</i> | <i>magna</i> | NA  | NA  | NA   | NA  | JQ279836 | NA  |
| <i>Daphnia</i> | <i>magna</i> | NA  | NA  | NA   | NA  | JQ279837 | NA  |
| <i>Daphnia</i> | <i>magna</i> | NA  | NA  | NA   | NA  | JQ279838 | NA  |
| <i>Daphnia</i> | <i>magna</i> | NA  | NA  | NA   | NA  | JQ279839 | NA  |
| <i>Daphnia</i> | <i>magna</i> | NA  | NA  | NA   | NA  | JQ279840 | NA  |
| <i>Daphnia</i> | <i>magna</i> | NA  | NA  | NA   | NA  | JQ279841 | NA  |
| <i>Daphnia</i> | <i>magna</i> | NA  | NA  | NA   | NA  | JQ279842 | NA  |
| <i>Daphnia</i> | <i>magna</i> | NA  | NA  | NA   | NA  | JQ279843 | NA  |
| Genus          | Species      | 28s | 18s | 5.8s | 12s | COI      | ND2 |
| <i>Daphnia</i> | <i>magna</i> | NA  | NA  | NA   | NA  | JQ279844 | NA  |
| <i>Daphnia</i> | <i>magna</i> | NA  | NA  | NA   | NA  | JQ279845 | NA  |
| <i>Daphnia</i> | <i>magna</i> | NA  | NA  | NA   | NA  | JQ279822 | NA  |
| <i>Daphnia</i> | <i>magna</i> | NA  | NA  | NA   | NA  | JQ279823 | NA  |
| <i>Daphnia</i> | <i>magna</i> | NA  | NA  | NA   | NA  | KT963308 | NA  |
| <i>Daphnia</i> | <i>magna</i> | NA  | NA  | NA   | NA  | KT963309 | NA  |
| <i>Daphnia</i> | <i>magna</i> | NA  | NA  | NA   | NA  | GQ457333 | NA  |
| <i>Daphnia</i> | <i>magna</i> | NA  | NA  | NA   | NA  | GQ457316 | NA  |
| <i>Daphnia</i> | <i>magna</i> | NA  | NA  | NA   | NA  | GQ457321 | NA  |
| <i>Daphnia</i> | <i>magna</i> | NA  | NA  | NA   | NA  | GQ457329 | NA  |
| <i>Daphnia</i> | <i>magna</i> | NA  | NA  | NA   | NA  | GQ457322 | NA  |
| <i>Daphnia</i> | <i>magna</i> | NA  | NA  | NA   | NA  | GQ457330 | NA  |
| <i>Daphnia</i> | <i>magna</i> | NA  | NA  | NA   | NA  | GQ457323 | NA  |
| <i>Daphnia</i> | <i>magna</i> | NA  | NA  | NA   | NA  | GQ457324 | NA  |
| <i>Daphnia</i> | <i>magna</i> | NA  | NA  | NA   | NA  | GQ457325 | NA  |
| <i>Daphnia</i> | <i>magna</i> | NA  | NA  | NA   | NA  | GQ457317 | NA  |
| <i>Daphnia</i> | <i>magna</i> | NA  | NA  | NA   | NA  | GQ457326 | NA  |
| <i>Daphnia</i> | <i>magna</i> | NA  | NA  | NA   | NA  | GQ457327 | NA  |
| <i>Daphnia</i> | <i>magna</i> | NA  | NA  | NA   | NA  | GQ457328 | NA  |
| <i>Daphnia</i> | <i>magna</i> | NA  | NA  | NA   | NA  | GQ457318 | NA  |
| <i>Daphnia</i> | <i>magna</i> | NA  | NA  | NA   | NA  | GQ457319 | NA  |
| <i>Daphnia</i> | <i>magna</i> | NA  | NA  | NA   | NA  | GQ457320 | NA  |

|                |                |            |            |             |            |            |            |
|----------------|----------------|------------|------------|-------------|------------|------------|------------|
| <i>Daphnia</i> | <i>magna</i>   | NA         | NA         | NA          | NA         | GQ457315   | NA         |
| <i>Daphnia</i> | <i>magna</i>   | NA         | NA         | NA          | NA         | JQ280146   | NA         |
| <i>Daphnia</i> | <i>magna</i>   | NA         | NA         | NA          | NA         | JQ280147   | NA         |
| <i>Daphnia</i> | <i>magna</i>   | NA         | NA         | NA          | NA         | JQ280148   | NA         |
| <i>Daphnia</i> | <i>magna</i>   | NA         | NA         | NA          | NA         | JQ280149   | NA         |
| <i>Daphnia</i> | <i>magna</i>   | NA         | NA         | NA          | NA         | JQ280150   | NA         |
| <i>Daphnia</i> | <i>magna</i>   | NA         | NA         | NA          | NA         | JQ280151   | NA         |
| <i>Daphnia</i> | <i>magna</i>   | NA         | NA         | NA          | NA         | JQ280152   | NA         |
| <i>Daphnia</i> | <i>magna</i>   | NA         | NA         | NA          | NA         | JQ280165   | NA         |
| <i>Daphnia</i> | <i>magna</i>   | NA         | NA         | NA          | NA         | JQ280160   | NA         |
| <i>Daphnia</i> | <i>magna</i>   | NA         | NA         | NA          | NA         | JQ280161   | NA         |
| <i>Daphnia</i> | <i>magna</i>   | NA         | NA         | NA          | NA         | JQ280162   | NA         |
| <i>Daphnia</i> | <i>magna</i>   | NA         | NA         | NA          | NA         | JQ280163   | NA         |
| <i>Daphnia</i> | <i>magna</i>   | NA         | NA         | NA          | NA         | JQ280164   | NA         |
| <i>Daphnia</i> | <i>magna</i>   | NA         | NA         | NA          | NA         | JQ280153   | NA         |
| <i>Daphnia</i> | <i>magna</i>   | NA         | NA         | NA          | NA         | JQ280159   | NA         |
| <i>Daphnia</i> | <i>magna</i>   | NA         | NA         | NA          | NA         | JQ280154   | NA         |
| <i>Daphnia</i> | <i>magna</i>   | NA         | NA         | NA          | NA         | JQ280155   | NA         |
| <i>Daphnia</i> | <i>magna</i>   | NA         | NA         | NA          | NA         | JQ280156   | NA         |
| <b>Genus</b>   | <b>Species</b> | <b>28s</b> | <b>18s</b> | <b>5.8s</b> | <b>12s</b> | <b>COI</b> | <b>ND2</b> |
| <i>Daphnia</i> | <i>magna</i>   | NA         | NA         | NA          | NA         | JQ280157   | NA         |
| <i>Daphnia</i> | <i>magna</i>   | NA         | NA         | NA          | NA         | JQ280158   | NA         |
| <i>Daphnia</i> | <i>magna</i>   | NA         | NA         | NA          | NA         | JQ280171   | NA         |
| <i>Daphnia</i> | <i>magna</i>   | NA         | NA         | NA          | NA         | JQ280186   | NA         |
| <i>Daphnia</i> | <i>magna</i>   | NA         | NA         | NA          | NA         | JQ280179   | NA         |
| <i>Daphnia</i> | <i>magna</i>   | NA         | NA         | NA          | NA         | JQ280184   | NA         |
| <i>Daphnia</i> | <i>magna</i>   | NA         | NA         | NA          | NA         | JQ280185   | NA         |
| <i>Daphnia</i> | <i>magna</i>   | NA         | NA         | NA          | NA         | JQ280174   | NA         |
| <i>Daphnia</i> | <i>magna</i>   | NA         | NA         | NA          | NA         | JQ280172   | NA         |
| <i>Daphnia</i> | <i>magna</i>   | NA         | NA         | NA          | NA         | JQ280173   | NA         |
| <i>Daphnia</i> | <i>magna</i>   | NA         | NA         | NA          | NA         | JQ280175   | NA         |
| <i>Daphnia</i> | <i>magna</i>   | NA         | NA         | NA          | NA         | JQ280176   | NA         |
| <i>Daphnia</i> | <i>magna</i>   | NA         | NA         | NA          | NA         | JQ280177   | NA         |
| <i>Daphnia</i> | <i>magna</i>   | NA         | NA         | NA          | NA         | JQ280178   | NA         |
| <i>Daphnia</i> | <i>magna</i>   | NA         | NA         | NA          | NA         | JQ280166   | NA         |
| <i>Daphnia</i> | <i>magna</i>   | NA         | NA         | NA          | NA         | JQ280183   | NA         |
| <i>Daphnia</i> | <i>magna</i>   | NA         | NA         | NA          | NA         | JQ280187   | NA         |
| <i>Daphnia</i> | <i>magna</i>   | NA         | NA         | NA          | NA         | JQ280169   | NA         |
| <i>Daphnia</i> | <i>magna</i>   | NA         | NA         | NA          | NA         | JQ280170   | NA         |
| <i>Daphnia</i> | <i>magna</i>   | NA         | NA         | NA          | NA         | JQ280188   | NA         |
| <i>Daphnia</i> | <i>magna</i>   | NA         | NA         | NA          | NA         | JQ280180   | NA         |
| <i>Daphnia</i> | <i>magna</i>   | NA         | NA         | NA          | NA         | JQ280167   | NA         |
| <i>Daphnia</i> | <i>magna</i>   | NA         | NA         | NA          | NA         | JQ280168   | NA         |
| <i>Daphnia</i> | <i>magna</i>   | NA         | NA         | NA          | NA         | JQ280181   | NA         |
| <i>Daphnia</i> | <i>magna</i>   | NA         | NA         | NA          | NA         | JQ280182   | NA         |
| <i>Daphnia</i> | <i>magna</i>   | NA         | NA         | NA          | NA         | JQ279846   | NA         |
| <i>Daphnia</i> | <i>magna</i>   | NA         | NA         | NA          | NA         | JQ279855   | NA         |
| <i>Daphnia</i> | <i>magna</i>   | NA         | NA         | NA          | NA         | JQ279856   | NA         |
| <i>Daphnia</i> | <i>magna</i>   | NA         | NA         | NA          | NA         | JQ279857   | NA         |
| <i>Daphnia</i> | <i>magna</i>   | NA         | NA         | NA          | NA         | JQ279858   | NA         |
| <i>Daphnia</i> | <i>magna</i>   | NA         | NA         | NA          | NA         | JQ279859   | NA         |
| <i>Daphnia</i> | <i>magna</i>   | NA         | NA         | NA          | NA         | JQ279860   | NA         |
| <i>Daphnia</i> | <i>magna</i>   | NA         | NA         | NA          | NA         | JQ279861   | NA         |
| <i>Daphnia</i> | <i>magna</i>   | NA         | NA         | NA          | NA         | JQ279862   | NA         |
| <i>Daphnia</i> | <i>magna</i>   | NA         | NA         | NA          | NA         | JQ279863   | NA         |
| <i>Daphnia</i> | <i>magna</i>   | NA         | NA         | NA          | NA         | JQ279864   | NA         |
| <i>Daphnia</i> | <i>magna</i>   | NA         | NA         | NA          | NA         | JQ279847   | NA         |
| <i>Daphnia</i> | <i>magna</i>   | NA         | NA         | NA          | NA         | JQ279865   | NA         |
| <i>Daphnia</i> | <i>magna</i>   | NA         | NA         | NA          | NA         | JQ279866   | NA         |
| <i>Daphnia</i> | <i>magna</i>   | NA         | NA         | NA          | NA         | JQ279867   | NA         |
| <i>Daphnia</i> | <i>magna</i>   | NA         | NA         | NA          | NA         | JQ279868   | NA         |
| <b>Genus</b>   | <b>Species</b> | <b>28s</b> | <b>18s</b> | <b>5.8s</b> | <b>12s</b> | <b>COI</b> | <b>ND2</b> |
| <i>Daphnia</i> | <i>magna</i>   | NA         | NA         | NA          | NA         | JQ279869   | NA         |
| <i>Daphnia</i> | <i>magna</i>   | NA         | NA         | NA          | NA         | JQ279870   | NA         |
| <i>Daphnia</i> | <i>magna</i>   | NA         | NA         | NA          | NA         | JQ279871   | NA         |

|                |                |            |            |             |            |            |            |
|----------------|----------------|------------|------------|-------------|------------|------------|------------|
| <i>Daphnia</i> | <i>magna</i>   | NA         | NA         | NA          | NA         | JQ279872   | NA         |
| <i>Daphnia</i> | <i>magna</i>   | NA         | NA         | NA          | NA         | JQ279873   | NA         |
| <i>Daphnia</i> | <i>magna</i>   | NA         | NA         | NA          | NA         | JQ279874   | NA         |
| <i>Daphnia</i> | <i>magna</i>   | NA         | NA         | NA          | NA         | JQ279848   | NA         |
| <i>Daphnia</i> | <i>magna</i>   | NA         | NA         | NA          | NA         | JQ279875   | NA         |
| <i>Daphnia</i> | <i>magna</i>   | NA         | NA         | NA          | NA         | JQ279876   | NA         |
| <i>Daphnia</i> | <i>magna</i>   | NA         | NA         | NA          | NA         | JQ279877   | NA         |
| <i>Daphnia</i> | <i>magna</i>   | NA         | NA         | NA          | NA         | JQ279878   | NA         |
| <i>Daphnia</i> | <i>magna</i>   | NA         | NA         | NA          | NA         | JQ279879   | NA         |
| <i>Daphnia</i> | <i>magna</i>   | NA         | NA         | NA          | NA         | JQ279880   | NA         |
| <i>Daphnia</i> | <i>magna</i>   | NA         | NA         | NA          | NA         | JQ279881   | NA         |
| <i>Daphnia</i> | <i>magna</i>   | NA         | NA         | NA          | NA         | JQ279849   | NA         |
| <i>Daphnia</i> | <i>magna</i>   | NA         | NA         | NA          | NA         | JQ279850   | NA         |
| <i>Daphnia</i> | <i>magna</i>   | NA         | NA         | NA          | NA         | JQ279851   | NA         |
| <i>Daphnia</i> | <i>magna</i>   | NA         | NA         | NA          | NA         | JQ279852   | NA         |
| <i>Daphnia</i> | <i>magna</i>   | NA         | NA         | NA          | NA         | JQ279853   | NA         |
| <i>Daphnia</i> | <i>magna</i>   | NA         | NA         | NA          | NA         | JQ279854   | NA         |
| <i>Daphnia</i> | <i>magna</i>   | NA         | NA         | NA          | NA         | JQ280195   | NA         |
| <i>Daphnia</i> | <i>magna</i>   | NA         | NA         | NA          | NA         | JQ280207   | NA         |
| <i>Daphnia</i> | <i>magna</i>   | NA         | NA         | NA          | NA         | JQ280208   | NA         |
| <i>Daphnia</i> | <i>magna</i>   | NA         | NA         | NA          | NA         | JQ280209   | NA         |
| <i>Daphnia</i> | <i>magna</i>   | NA         | NA         | NA          | NA         | JQ280210   | NA         |
| <i>Daphnia</i> | <i>magna</i>   | NA         | NA         | NA          | NA         | JQ280211   | NA         |
| <i>Daphnia</i> | <i>magna</i>   | NA         | NA         | NA          | NA         | JQ280205   | NA         |
| <i>Daphnia</i> | <i>magna</i>   | NA         | NA         | NA          | NA         | JQ280196   | NA         |
| <i>Daphnia</i> | <i>magna</i>   | NA         | NA         | NA          | NA         | JQ280197   | NA         |
| <i>Daphnia</i> | <i>magna</i>   | NA         | NA         | NA          | NA         | JQ280198   | NA         |
| <i>Daphnia</i> | <i>magna</i>   | NA         | NA         | NA          | NA         | JQ280199   | NA         |
| <i>Daphnia</i> | <i>magna</i>   | NA         | NA         | NA          | NA         | JQ280200   | NA         |
| <i>Daphnia</i> | <i>magna</i>   | NA         | NA         | NA          | NA         | JQ280201   | NA         |
| <i>Daphnia</i> | <i>magna</i>   | NA         | NA         | NA          | NA         | JQ280206   | NA         |
| <i>Daphnia</i> | <i>magna</i>   | NA         | NA         | NA          | NA         | JQ280193   | NA         |
| <i>Daphnia</i> | <i>magna</i>   | NA         | NA         | NA          | NA         | JQ280194   | NA         |
| <i>Daphnia</i> | <i>magna</i>   | NA         | NA         | NA          | NA         | JQ280202   | NA         |
| <i>Daphnia</i> | <i>magna</i>   | NA         | NA         | NA          | NA         | JQ280203   | NA         |
| <i>Daphnia</i> | <i>magna</i>   | NA         | NA         | NA          | NA         | JQ280204   | NA         |
| <i>Daphnia</i> | <i>magna</i>   | NA         | NA         | NA          | NA         | JQ280190   | NA         |
| <i>Daphnia</i> | <i>magna</i>   | NA         | NA         | NA          | NA         | JQ280189   | NA         |
| <b>Genus</b>   | <b>Species</b> | <b>28s</b> | <b>18s</b> | <b>5.8s</b> | <b>12s</b> | <b>COI</b> | <b>ND2</b> |
| <i>Daphnia</i> | <i>magna</i>   | NA         | NA         | NA          | NA         | JQ280191   | NA         |
| <i>Daphnia</i> | <i>magna</i>   | NA         | NA         | NA          | NA         | JQ280192   | NA         |
| <i>Daphnia</i> | <i>magna</i>   | NA         | NA         | NA          | NA         | JQ279882   | NA         |
| <i>Daphnia</i> | <i>magna</i>   | NA         | NA         | NA          | NA         | JQ279891   | NA         |
| <i>Daphnia</i> | <i>magna</i>   | NA         | NA         | NA          | NA         | JQ279892   | NA         |
| <i>Daphnia</i> | <i>magna</i>   | NA         | NA         | NA          | NA         | JQ279893   | NA         |
| <i>Daphnia</i> | <i>magna</i>   | NA         | NA         | NA          | NA         | JQ279894   | NA         |
| <i>Daphnia</i> | <i>magna</i>   | NA         | NA         | NA          | NA         | JQ279895   | NA         |
| <i>Daphnia</i> | <i>magna</i>   | NA         | NA         | NA          | NA         | JQ279896   | NA         |
| <i>Daphnia</i> | <i>magna</i>   | NA         | NA         | NA          | NA         | JQ279897   | NA         |
| <i>Daphnia</i> | <i>magna</i>   | NA         | NA         | NA          | NA         | JQ279898   | NA         |
| <i>Daphnia</i> | <i>magna</i>   | NA         | NA         | NA          | NA         | JQ279899   | NA         |
| <i>Daphnia</i> | <i>magna</i>   | NA         | NA         | NA          | NA         | JQ279900   | NA         |
| <i>Daphnia</i> | <i>magna</i>   | NA         | NA         | NA          | NA         | JQ279883   | NA         |
| <i>Daphnia</i> | <i>magna</i>   | NA         | NA         | NA          | NA         | JQ279901   | NA         |
| <i>Daphnia</i> | <i>magna</i>   | NA         | NA         | NA          | NA         | JQ279884   | NA         |
| <i>Daphnia</i> | <i>magna</i>   | NA         | NA         | NA          | NA         | JQ279885   | NA         |
| <i>Daphnia</i> | <i>magna</i>   | NA         | NA         | NA          | NA         | JQ279886   | NA         |
| <i>Daphnia</i> | <i>magna</i>   | NA         | NA         | NA          | NA         | JQ279887   | NA         |
| <i>Daphnia</i> | <i>magna</i>   | NA         | NA         | NA          | NA         | JQ279888   | NA         |
| <i>Daphnia</i> | <i>magna</i>   | NA         | NA         | NA          | NA         | JQ279889   | NA         |
| <i>Daphnia</i> | <i>magna</i>   | NA         | NA         | NA          | NA         | JQ279890   | NA         |
| <i>Daphnia</i> | <i>magna</i>   | NA         | NA         | NA          | NA         | JQ280219   | NA         |
| <i>Daphnia</i> | <i>magna</i>   | NA         | NA         | NA          | NA         | JQ280233   | NA         |
| <i>Daphnia</i> | <i>magna</i>   | NA         | NA         | NA          | NA         | JQ280234   | NA         |
| <i>Daphnia</i> | <i>magna</i>   | NA         | NA         | NA          | NA         | JQ280235   | NA         |

|                |                |            |            |             |            |            |            |
|----------------|----------------|------------|------------|-------------|------------|------------|------------|
| <i>Daphnia</i> | <i>magna</i>   | NA         | NA         | NA          | NA         | JQ280236   | NA         |
| <i>Daphnia</i> | <i>magna</i>   | NA         | NA         | NA          | NA         | JQ280237   | NA         |
| <i>Daphnia</i> | <i>magna</i>   | NA         | NA         | NA          | NA         | JQ280220   | NA         |
| <i>Daphnia</i> | <i>magna</i>   | NA         | NA         | NA          | NA         | JQ280221   | NA         |
| <i>Daphnia</i> | <i>magna</i>   | NA         | NA         | NA          | NA         | JQ280222   | NA         |
| <i>Daphnia</i> | <i>magna</i>   | NA         | NA         | NA          | NA         | JQ280223   | NA         |
| <i>Daphnia</i> | <i>magna</i>   | NA         | NA         | NA          | NA         | JQ280224   | NA         |
| <i>Daphnia</i> | <i>magna</i>   | NA         | NA         | NA          | NA         | JQ280225   | NA         |
| <i>Daphnia</i> | <i>magna</i>   | NA         | NA         | NA          | NA         | JQ280226   | NA         |
| <i>Daphnia</i> | <i>magna</i>   | NA         | NA         | NA          | NA         | JQ280212   | NA         |
| <i>Daphnia</i> | <i>magna</i>   | NA         | NA         | NA          | NA         | JQ280227   | NA         |
| <i>Daphnia</i> | <i>magna</i>   | NA         | NA         | NA          | NA         | JQ280228   | NA         |
| <i>Daphnia</i> | <i>magna</i>   | NA         | NA         | NA          | NA         | JQ280229   | NA         |
| <i>Daphnia</i> | <i>magna</i>   | NA         | NA         | NA          | NA         | JQ280230   | NA         |
| <i>Daphnia</i> | <i>magna</i>   | NA         | NA         | NA          | NA         | JQ280231   | NA         |
| <b>Genus</b>   | <b>Species</b> | <b>28s</b> | <b>18s</b> | <b>5.8s</b> | <b>12s</b> | <b>COI</b> | <b>ND2</b> |
| <i>Daphnia</i> | <i>magna</i>   | NA         | NA         | NA          | NA         | JQ280213   | NA         |
| <i>Daphnia</i> | <i>magna</i>   | NA         | NA         | NA          | NA         | JQ280214   | NA         |
| <i>Daphnia</i> | <i>magna</i>   | NA         | NA         | NA          | NA         | JQ280215   | NA         |
| <i>Daphnia</i> | <i>magna</i>   | NA         | NA         | NA          | NA         | JQ280216   | NA         |
| <i>Daphnia</i> | <i>magna</i>   | NA         | NA         | NA          | NA         | JQ280217   | NA         |
| <i>Daphnia</i> | <i>magna</i>   | NA         | NA         | NA          | NA         | JQ280218   | NA         |
| <i>Daphnia</i> | <i>magna</i>   | NA         | NA         | NA          | NA         | JQ280232   | NA         |
| <i>Daphnia</i> | <i>magna</i>   | NA         | NA         | NA          | NA         | JQ279902   | NA         |
| <i>Daphnia</i> | <i>magna</i>   | NA         | NA         | NA          | NA         | JQ279911   | NA         |
| <i>Daphnia</i> | <i>magna</i>   | NA         | NA         | NA          | NA         | JQ279912   | NA         |
| <i>Daphnia</i> | <i>magna</i>   | NA         | NA         | NA          | NA         | JQ279913   | NA         |
| <i>Daphnia</i> | <i>magna</i>   | NA         | NA         | NA          | NA         | JQ279914   | NA         |
| <i>Daphnia</i> | <i>magna</i>   | NA         | NA         | NA          | NA         | JQ279915   | NA         |
| <i>Daphnia</i> | <i>magna</i>   | NA         | NA         | NA          | NA         | JQ279916   | NA         |
| <i>Daphnia</i> | <i>magna</i>   | NA         | NA         | NA          | NA         | JQ279917   | NA         |
| <i>Daphnia</i> | <i>magna</i>   | NA         | NA         | NA          | NA         | JQ279918   | NA         |
| <i>Daphnia</i> | <i>magna</i>   | NA         | NA         | NA          | NA         | JQ279919   | NA         |
| <i>Daphnia</i> | <i>magna</i>   | NA         | NA         | NA          | NA         | JQ279920   | NA         |
| <i>Daphnia</i> | <i>magna</i>   | NA         | NA         | NA          | NA         | JQ279903   | NA         |
| <i>Daphnia</i> | <i>magna</i>   | NA         | NA         | NA          | NA         | JQ279921   | NA         |
| <i>Daphnia</i> | <i>magna</i>   | NA         | NA         | NA          | NA         | JQ279922   | NA         |
| <i>Daphnia</i> | <i>magna</i>   | NA         | NA         | NA          | NA         | JQ279923   | NA         |
| <i>Daphnia</i> | <i>magna</i>   | NA         | NA         | NA          | NA         | JQ279924   | NA         |
| <i>Daphnia</i> | <i>magna</i>   | NA         | NA         | NA          | NA         | JQ279925   | NA         |
| <i>Daphnia</i> | <i>magna</i>   | NA         | NA         | NA          | NA         | JQ279926   | NA         |
| <i>Daphnia</i> | <i>magna</i>   | NA         | NA         | NA          | NA         | JQ279927   | NA         |
| <i>Daphnia</i> | <i>magna</i>   | NA         | NA         | NA          | NA         | JQ279928   | NA         |
| <i>Daphnia</i> | <i>magna</i>   | NA         | NA         | NA          | NA         | JQ279929   | NA         |
| <i>Daphnia</i> | <i>magna</i>   | NA         | NA         | NA          | NA         | JQ279930   | NA         |
| <i>Daphnia</i> | <i>magna</i>   | NA         | NA         | NA          | NA         | JQ279904   | NA         |
| <i>Daphnia</i> | <i>magna</i>   | NA         | NA         | NA          | NA         | JQ279931   | NA         |
| <i>Daphnia</i> | <i>magna</i>   | NA         | NA         | NA          | NA         | JQ279932   | NA         |
| <i>Daphnia</i> | <i>magna</i>   | NA         | NA         | NA          | NA         | JQ279933   | NA         |
| <i>Daphnia</i> | <i>magna</i>   | NA         | NA         | NA          | NA         | JQ279934   | NA         |
| <i>Daphnia</i> | <i>magna</i>   | NA         | NA         | NA          | NA         | JQ279935   | NA         |
| <i>Daphnia</i> | <i>magna</i>   | NA         | NA         | NA          | NA         | JQ279936   | NA         |
| <i>Daphnia</i> | <i>magna</i>   | NA         | NA         | NA          | NA         | JQ279937   | NA         |
| <i>Daphnia</i> | <i>magna</i>   | NA         | NA         | NA          | NA         | JQ279905   | NA         |
| <i>Daphnia</i> | <i>magna</i>   | NA         | NA         | NA          | NA         | JQ279906   | NA         |
| <i>Daphnia</i> | <i>magna</i>   | NA         | NA         | NA          | NA         | JQ279907   | NA         |
| <i>Daphnia</i> | <i>magna</i>   | NA         | NA         | NA          | NA         | JQ279908   | NA         |
| <b>Genus</b>   | <b>Species</b> | <b>28s</b> | <b>18s</b> | <b>5.8s</b> | <b>12s</b> | <b>COI</b> | <b>ND2</b> |
| <i>Daphnia</i> | <i>magna</i>   | NA         | NA         | NA          | NA         | JQ279909   | NA         |
| <i>Daphnia</i> | <i>magna</i>   | NA         | NA         | NA          | NA         | JQ279910   | NA         |
| <i>Daphnia</i> | <i>magna</i>   | NA         | NA         | NA          | NA         | KX442692   | NA         |
| <i>Daphnia</i> | <i>magna</i>   | NA         | NA         | NA          | NA         | KX442693   | NA         |
| <i>Daphnia</i> | <i>magna</i>   | NA         | NA         | NA          | NA         | JQ280245   | NA         |
| <i>Daphnia</i> | <i>magna</i>   | NA         | NA         | NA          | NA         | JQ280260   | NA         |
| <i>Daphnia</i> | <i>magna</i>   | NA         | NA         | NA          | NA         | JQ280252   | NA         |

|                |                |            |            |             |            |            |            |
|----------------|----------------|------------|------------|-------------|------------|------------|------------|
| <i>Daphnia</i> | <i>magna</i>   | NA         | NA         | NA          | NA         | JQ280253   | NA         |
| <i>Daphnia</i> | <i>magna</i>   | NA         | NA         | NA          | NA         | JQ280254   | NA         |
| <i>Daphnia</i> | <i>magna</i>   | NA         | NA         | NA          | NA         | JQ280246   | NA         |
| <i>Daphnia</i> | <i>magna</i>   | NA         | NA         | NA          | NA         | JQ280247   | NA         |
| <i>Daphnia</i> | <i>magna</i>   | NA         | NA         | NA          | NA         | JQ280248   | NA         |
| <i>Daphnia</i> | <i>magna</i>   | NA         | NA         | NA          | NA         | JQ280249   | NA         |
| <i>Daphnia</i> | <i>magna</i>   | NA         | NA         | NA          | NA         | JQ280250   | NA         |
| <i>Daphnia</i> | <i>magna</i>   | NA         | NA         | NA          | NA         | JQ280251   | NA         |
| <i>Daphnia</i> | <i>magna</i>   | NA         | NA         | NA          | NA         | JQ280255   | NA         |
| <i>Daphnia</i> | <i>magna</i>   | NA         | NA         | NA          | NA         | JQ280244   | NA         |
| <i>Daphnia</i> | <i>magna</i>   | NA         | NA         | NA          | NA         | JQ280256   | NA         |
| <i>Daphnia</i> | <i>magna</i>   | NA         | NA         | NA          | NA         | JQ280257   | NA         |
| <i>Daphnia</i> | <i>magna</i>   | NA         | NA         | NA          | NA         | JQ280258   | NA         |
| <i>Daphnia</i> | <i>magna</i>   | NA         | NA         | NA          | NA         | JQ280259   | NA         |
| <i>Daphnia</i> | <i>magna</i>   | NA         | NA         | NA          | NA         | JQ280238   | NA         |
| <i>Daphnia</i> | <i>magna</i>   | NA         | NA         | NA          | NA         | JQ280239   | NA         |
| <i>Daphnia</i> | <i>magna</i>   | NA         | NA         | NA          | NA         | JQ280240   | NA         |
| <i>Daphnia</i> | <i>magna</i>   | NA         | NA         | NA          | NA         | JQ280241   | NA         |
| <i>Daphnia</i> | <i>magna</i>   | NA         | NA         | NA          | NA         | JQ280242   | NA         |
| <i>Daphnia</i> | <i>magna</i>   | NA         | NA         | NA          | NA         | JQ280243   | NA         |
| <i>Daphnia</i> | <i>magna</i>   | NA         | NA         | NA          | NA         | JQ280262   | NA         |
| <i>Daphnia</i> | <i>magna</i>   | NA         | NA         | NA          | NA         | JQ280263   | NA         |
| <i>Daphnia</i> | <i>magna</i>   | NA         | NA         | NA          | NA         | JQ280264   | NA         |
| <i>Daphnia</i> | <i>magna</i>   | NA         | NA         | NA          | NA         | JQ280261   | NA         |
| <i>Daphnia</i> | <i>magna</i>   | NA         | NA         | NA          | NA         | JQ280265   | NA         |
| <i>Daphnia</i> | <i>magna</i>   | NA         | NA         | NA          | NA         | JQ280266   | NA         |
| <i>Daphnia</i> | <i>magna</i>   | NA         | NA         | NA          | NA         | JQ279938   | NA         |
| <i>Daphnia</i> | <i>magna</i>   | NA         | NA         | NA          | NA         | JQ279947   | NA         |
| <i>Daphnia</i> | <i>magna</i>   | NA         | NA         | NA          | NA         | JQ279948   | NA         |
| <i>Daphnia</i> | <i>magna</i>   | NA         | NA         | NA          | NA         | JQ279939   | NA         |
| <i>Daphnia</i> | <i>magna</i>   | NA         | NA         | NA          | NA         | JQ279940   | NA         |
| <i>Daphnia</i> | <i>magna</i>   | NA         | NA         | NA          | NA         | JQ279941   | NA         |
| <i>Daphnia</i> | <i>magna</i>   | NA         | NA         | NA          | NA         | JQ279942   | NA         |
| <i>Daphnia</i> | <i>magna</i>   | NA         | NA         | NA          | NA         | JQ279943   | NA         |
| <b>Genus</b>   | <b>Species</b> | <b>28s</b> | <b>18s</b> | <b>5.8s</b> | <b>12s</b> | <b>COI</b> | <b>ND2</b> |
| <i>Daphnia</i> | <i>magna</i>   | NA         | NA         | NA          | NA         | JQ279944   | NA         |
| <i>Daphnia</i> | <i>magna</i>   | NA         | NA         | NA          | NA         | JQ279945   | NA         |
| <i>Daphnia</i> | <i>magna</i>   | NA         | NA         | NA          | NA         | JQ279946   | NA         |
| <i>Daphnia</i> | <i>magna</i>   | NA         | NA         | NA          | NA         | JQ279963   | NA         |
| <i>Daphnia</i> | <i>magna</i>   | NA         | NA         | NA          | NA         | JQ279949   | NA         |
| <i>Daphnia</i> | <i>magna</i>   | NA         | NA         | NA          | NA         | JQ279950   | NA         |
| <i>Daphnia</i> | <i>magna</i>   | NA         | NA         | NA          | NA         | JQ279951   | NA         |
| <i>Daphnia</i> | <i>magna</i>   | NA         | NA         | NA          | NA         | JQ279952   | NA         |
| <i>Daphnia</i> | <i>magna</i>   | NA         | NA         | NA          | NA         | JQ279953   | NA         |
| <i>Daphnia</i> | <i>magna</i>   | NA         | NA         | NA          | NA         | JQ279954   | NA         |
| <i>Daphnia</i> | <i>magna</i>   | NA         | NA         | NA          | NA         | JQ279955   | NA         |
| <i>Daphnia</i> | <i>magna</i>   | NA         | NA         | NA          | NA         | JQ279956   | NA         |
| <i>Daphnia</i> | <i>magna</i>   | NA         | NA         | NA          | NA         | JQ279957   | NA         |
| <i>Daphnia</i> | <i>magna</i>   | NA         | NA         | NA          | NA         | JQ279958   | NA         |
| <i>Daphnia</i> | <i>magna</i>   | NA         | NA         | NA          | NA         | JQ279959   | NA         |
| <i>Daphnia</i> | <i>magna</i>   | NA         | NA         | NA          | NA         | JQ279960   | NA         |
| <i>Daphnia</i> | <i>magna</i>   | NA         | NA         | NA          | NA         | JQ279961   | NA         |
| <i>Daphnia</i> | <i>magna</i>   | NA         | NA         | NA          | NA         | JQ279962   | NA         |
| <i>Daphnia</i> | <i>magna</i>   | NA         | NA         | NA          | NA         | JQ279964   | NA         |
| <i>Daphnia</i> | <i>magna</i>   | NA         | NA         | NA          | NA         | JQ279973   | NA         |
| <i>Daphnia</i> | <i>magna</i>   | NA         | NA         | NA          | NA         | JQ279974   | NA         |
| <i>Daphnia</i> | <i>magna</i>   | NA         | NA         | NA          | NA         | JQ279975   | NA         |
| <i>Daphnia</i> | <i>magna</i>   | NA         | NA         | NA          | NA         | JQ279976   | NA         |
| <i>Daphnia</i> | <i>magna</i>   | NA         | NA         | NA          | NA         | JQ279977   | NA         |
| <i>Daphnia</i> | <i>magna</i>   | NA         | NA         | NA          | NA         | JQ279978   | NA         |
| <i>Daphnia</i> | <i>magna</i>   | NA         | NA         | NA          | NA         | JQ279979   | NA         |
| <i>Daphnia</i> | <i>magna</i>   | NA         | NA         | NA          | NA         | JQ279980   | NA         |
| <i>Daphnia</i> | <i>magna</i>   | NA         | NA         | NA          | NA         | JQ279981   | NA         |
| <i>Daphnia</i> | <i>magna</i>   | NA         | NA         | NA          | NA         | JQ279982   | NA         |
| <i>Daphnia</i> | <i>magna</i>   | NA         | NA         | NA          | NA         | JQ279965   | NA         |

|                |                |            |            |             |            |            |            |
|----------------|----------------|------------|------------|-------------|------------|------------|------------|
| <i>Daphnia</i> | <i>magna</i>   | NA         | NA         | NA          | NA         | JQ279983   | NA         |
| <i>Daphnia</i> | <i>magna</i>   | NA         | NA         | NA          | NA         | JQ279984   | NA         |
| <i>Daphnia</i> | <i>magna</i>   | NA         | NA         | NA          | NA         | JQ279985   | NA         |
| <i>Daphnia</i> | <i>magna</i>   | NA         | NA         | NA          | NA         | JQ279986   | NA         |
| <i>Daphnia</i> | <i>magna</i>   | NA         | NA         | NA          | NA         | JQ279987   | NA         |
| <i>Daphnia</i> | <i>magna</i>   | NA         | NA         | NA          | NA         | JQ279988   | NA         |
| <i>Daphnia</i> | <i>magna</i>   | NA         | NA         | NA          | NA         | JQ279989   | NA         |
| <i>Daphnia</i> | <i>magna</i>   | NA         | NA         | NA          | NA         | JQ279990   | NA         |
| <i>Daphnia</i> | <i>magna</i>   | NA         | NA         | NA          | NA         | JQ279991   | NA         |
| <i>Daphnia</i> | <i>magna</i>   | NA         | NA         | NA          | NA         | JQ279992   | NA         |
| <i>Daphnia</i> | <i>magna</i>   | NA         | NA         | NA          | NA         | JQ279966   | NA         |
| <b>Genus</b>   | <b>Species</b> | <b>28s</b> | <b>18s</b> | <b>5.8s</b> | <b>12s</b> | <b>COI</b> | <b>ND2</b> |
| <i>Daphnia</i> | <i>magna</i>   | NA         | NA         | NA          | NA         | JQ279993   | NA         |
| <i>Daphnia</i> | <i>magna</i>   | NA         | NA         | NA          | NA         | JQ279994   | NA         |
| <i>Daphnia</i> | <i>magna</i>   | NA         | NA         | NA          | NA         | JQ279995   | NA         |
| <i>Daphnia</i> | <i>magna</i>   | NA         | NA         | NA          | NA         | JQ279996   | NA         |
| <i>Daphnia</i> | <i>magna</i>   | NA         | NA         | NA          | NA         | JQ279997   | NA         |
| <i>Daphnia</i> | <i>magna</i>   | NA         | NA         | NA          | NA         | JQ279998   | NA         |
| <i>Daphnia</i> | <i>magna</i>   | NA         | NA         | NA          | NA         | JQ279999   | NA         |
| <i>Daphnia</i> | <i>magna</i>   | NA         | NA         | NA          | NA         | JQ279967   | NA         |
| <i>Daphnia</i> | <i>magna</i>   | NA         | NA         | NA          | NA         | JQ279968   | NA         |
| <i>Daphnia</i> | <i>magna</i>   | NA         | NA         | NA          | NA         | JQ279969   | NA         |
| <i>Daphnia</i> | <i>magna</i>   | NA         | NA         | NA          | NA         | JQ279970   | NA         |
| <i>Daphnia</i> | <i>magna</i>   | NA         | NA         | NA          | NA         | JQ279971   | NA         |
| <i>Daphnia</i> | <i>magna</i>   | NA         | NA         | NA          | NA         | JQ279972   | NA         |
| <i>Daphnia</i> | <i>magna</i>   | NA         | NA         | NA          | NA         | KX442694   | NA         |
| <i>Daphnia</i> | <i>magna</i>   | NA         | NA         | NA          | NA         | JQ280000   | NA         |
| <i>Daphnia</i> | <i>magna</i>   | NA         | NA         | NA          | NA         | JQ280009   | NA         |
| <i>Daphnia</i> | <i>magna</i>   | NA         | NA         | NA          | NA         | JQ280010   | NA         |
| <i>Daphnia</i> | <i>magna</i>   | NA         | NA         | NA          | NA         | JQ280011   | NA         |
| <i>Daphnia</i> | <i>magna</i>   | NA         | NA         | NA          | NA         | JQ280012   | NA         |
| <i>Daphnia</i> | <i>magna</i>   | NA         | NA         | NA          | NA         | JQ280013   | NA         |
| <i>Daphnia</i> | <i>magna</i>   | NA         | NA         | NA          | NA         | JQ280014   | NA         |
| <i>Daphnia</i> | <i>magna</i>   | NA         | NA         | NA          | NA         | JQ280015   | NA         |
| <i>Daphnia</i> | <i>magna</i>   | NA         | NA         | NA          | NA         | JQ280016   | NA         |
| <i>Daphnia</i> | <i>magna</i>   | NA         | NA         | NA          | NA         | JQ280017   | NA         |
| <i>Daphnia</i> | <i>magna</i>   | NA         | NA         | NA          | NA         | JQ280018   | NA         |
| <i>Daphnia</i> | <i>magna</i>   | NA         | NA         | NA          | NA         | JQ280001   | NA         |
| <i>Daphnia</i> | <i>magna</i>   | NA         | NA         | NA          | NA         | JQ280019   | NA         |
| <i>Daphnia</i> | <i>magna</i>   | NA         | NA         | NA          | NA         | JQ280020   | NA         |
| <i>Daphnia</i> | <i>magna</i>   | NA         | NA         | NA          | NA         | JQ280021   | NA         |
| <i>Daphnia</i> | <i>magna</i>   | NA         | NA         | NA          | NA         | JQ280022   | NA         |
| <i>Daphnia</i> | <i>magna</i>   | NA         | NA         | NA          | NA         | JQ280023   | NA         |
| <i>Daphnia</i> | <i>magna</i>   | NA         | NA         | NA          | NA         | JQ280024   | NA         |
| <i>Daphnia</i> | <i>magna</i>   | NA         | NA         | NA          | NA         | JQ280025   | NA         |
| <i>Daphnia</i> | <i>magna</i>   | NA         | NA         | NA          | NA         | JQ280026   | NA         |
| <i>Daphnia</i> | <i>magna</i>   | NA         | NA         | NA          | NA         | JQ280027   | NA         |
| <i>Daphnia</i> | <i>magna</i>   | NA         | NA         | NA          | NA         | JQ280028   | NA         |
| <i>Daphnia</i> | <i>magna</i>   | NA         | NA         | NA          | NA         | JQ280002   | NA         |
| <i>Daphnia</i> | <i>magna</i>   | NA         | NA         | NA          | NA         | JQ280029   | NA         |
| <i>Daphnia</i> | <i>magna</i>   | NA         | NA         | NA          | NA         | JQ280030   | NA         |
| <i>Daphnia</i> | <i>magna</i>   | NA         | NA         | NA          | NA         | JQ280031   | NA         |
| <i>Daphnia</i> | <i>magna</i>   | NA         | NA         | NA          | NA         | JQ280032   | NA         |
| <b>Genus</b>   | <b>Species</b> | <b>28s</b> | <b>18s</b> | <b>5.8s</b> | <b>12s</b> | <b>COI</b> | <b>ND2</b> |
| <i>Daphnia</i> | <i>magna</i>   | NA         | NA         | NA          | NA         | JQ280033   | NA         |
| <i>Daphnia</i> | <i>magna</i>   | NA         | NA         | NA          | NA         | JQ280034   | NA         |
| <i>Daphnia</i> | <i>magna</i>   | NA         | NA         | NA          | NA         | JQ280035   | NA         |
| <i>Daphnia</i> | <i>magna</i>   | NA         | NA         | NA          | NA         | JQ280003   | NA         |
| <i>Daphnia</i> | <i>magna</i>   | NA         | NA         | NA          | NA         | JQ280004   | NA         |
| <i>Daphnia</i> | <i>magna</i>   | NA         | NA         | NA          | NA         | JQ280005   | NA         |
| <i>Daphnia</i> | <i>magna</i>   | NA         | NA         | NA          | NA         | JQ280006   | NA         |
| <i>Daphnia</i> | <i>magna</i>   | NA         | NA         | NA          | NA         | JQ280007   | NA         |
| <i>Daphnia</i> | <i>magna</i>   | NA         | NA         | NA          | NA         | JQ280008   | NA         |
| <i>Daphnia</i> | <i>magna</i>   | NA         | NA         | NA          | NA         | JQ280278   | NA         |
| <i>Daphnia</i> | <i>magna</i>   | NA         | NA         | NA          | NA         | JQ280276   | NA         |

| <i>Daphnia</i> | <i>magna</i>   | NA         | NA         | NA          | NA         | JQ280275   | NA         |
|----------------|----------------|------------|------------|-------------|------------|------------|------------|
| <i>Daphnia</i> | <i>magna</i>   | NA         | NA         | NA          | NA         | JQ280277   | NA         |
| <i>Daphnia</i> | <i>magna</i>   | NA         | NA         | NA          | NA         | JQ280271   | NA         |
| <i>Daphnia</i> | <i>magna</i>   | NA         | NA         | NA          | NA         | JQ280272   | NA         |
| <i>Daphnia</i> | <i>magna</i>   | NA         | NA         | NA          | NA         | JQ280273   | NA         |
| <i>Daphnia</i> | <i>magna</i>   | NA         | NA         | NA          | NA         | JQ280274   | NA         |
| <i>Daphnia</i> | <i>magna</i>   | NA         | NA         | NA          | NA         | JQ280267   | NA         |
| <i>Daphnia</i> | <i>magna</i>   | NA         | NA         | NA          | NA         | JQ280270   | NA         |
| <i>Daphnia</i> | <i>magna</i>   | NA         | NA         | NA          | NA         | JQ280268   | NA         |
| <i>Daphnia</i> | <i>magna</i>   | NA         | NA         | NA          | NA         | JQ280269   | NA         |
| <i>Daphnia</i> | <i>magna</i>   | NA         | NA         | NA          | NA         | JQ280296   | NA         |
| <i>Daphnia</i> | <i>magna</i>   | NA         | NA         | NA          | NA         | JQ280288   | NA         |
| <i>Daphnia</i> | <i>magna</i>   | NA         | NA         | NA          | NA         | JQ280292   | NA         |
| <i>Daphnia</i> | <i>magna</i>   | NA         | NA         | NA          | NA         | JQ280293   | NA         |
| <i>Daphnia</i> | <i>magna</i>   | NA         | NA         | NA          | NA         | JQ280294   | NA         |
| <i>Daphnia</i> | <i>magna</i>   | NA         | NA         | NA          | NA         | JQ280295   | NA         |
| <i>Daphnia</i> | <i>magna</i>   | NA         | NA         | NA          | NA         | JQ280291   | NA         |
| <i>Daphnia</i> | <i>magna</i>   | NA         | NA         | NA          | NA         | JQ280286   | NA         |
| <i>Daphnia</i> | <i>magna</i>   | NA         | NA         | NA          | NA         | JQ280287   | NA         |
| <i>Daphnia</i> | <i>magna</i>   | NA         | NA         | NA          | NA         | JQ280279   | NA         |
| <i>Daphnia</i> | <i>magna</i>   | NA         | NA         | NA          | NA         | JQ280298   | NA         |
| <i>Daphnia</i> | <i>magna</i>   | NA         | NA         | NA          | NA         | JQ280299   | NA         |
| <i>Daphnia</i> | <i>magna</i>   | NA         | NA         | NA          | NA         | JQ280289   | NA         |
| <i>Daphnia</i> | <i>magna</i>   | NA         | NA         | NA          | NA         | JQ280290   | NA         |
| <i>Daphnia</i> | <i>magna</i>   | NA         | NA         | NA          | NA         | JQ280280   | NA         |
| <i>Daphnia</i> | <i>magna</i>   | NA         | NA         | NA          | NA         | JQ280281   | NA         |
| <i>Daphnia</i> | <i>magna</i>   | NA         | NA         | NA          | NA         | JQ280282   | NA         |
| <i>Daphnia</i> | <i>magna</i>   | NA         | NA         | NA          | NA         | JQ280283   | NA         |
| <i>Daphnia</i> | <i>magna</i>   | NA         | NA         | NA          | NA         | JQ280284   | NA         |
| <i>Daphnia</i> | <i>magna</i>   | NA         | NA         | NA          | NA         | JQ280285   | NA         |
| <b>Genus</b>   | <b>Species</b> | <b>28s</b> | <b>18s</b> | <b>5.8s</b> | <b>12s</b> | <b>COI</b> | <b>ND2</b> |
| <i>Daphnia</i> | <i>magna</i>   | NA         | NA         | NA          | NA         | JQ280297   | NA         |
| <i>Daphnia</i> | <i>magna</i>   | NA         | NA         | NA          | NA         | KX442698   | NA         |
| <i>Daphnia</i> | <i>magna</i>   | NA         | NA         | NA          | NA         | KX442699   | NA         |
| <i>Daphnia</i> | <i>magna</i>   | NA         | NA         | NA          | NA         | JQ280036   | NA         |
| <i>Daphnia</i> | <i>magna</i>   | NA         | NA         | NA          | NA         | JQ280045   | NA         |
| <i>Daphnia</i> | <i>magna</i>   | NA         | NA         | NA          | NA         | JQ280046   | NA         |
| <i>Daphnia</i> | <i>magna</i>   | NA         | NA         | NA          | NA         | JQ280047   | NA         |
| <i>Daphnia</i> | <i>magna</i>   | NA         | NA         | NA          | NA         | JQ280048   | NA         |
| <i>Daphnia</i> | <i>magna</i>   | NA         | NA         | NA          | NA         | JQ280049   | NA         |
| <i>Daphnia</i> | <i>magna</i>   | NA         | NA         | NA          | NA         | JQ280050   | NA         |
| <i>Daphnia</i> | <i>magna</i>   | NA         | NA         | NA          | NA         | JQ280051   | NA         |
| <i>Daphnia</i> | <i>magna</i>   | NA         | NA         | NA          | NA         | JQ280052   | NA         |
| <i>Daphnia</i> | <i>magna</i>   | NA         | NA         | NA          | NA         | JQ280053   | NA         |
| <i>Daphnia</i> | <i>magna</i>   | NA         | NA         | NA          | NA         | JQ280054   | NA         |
| <i>Daphnia</i> | <i>magna</i>   | NA         | NA         | NA          | NA         | JQ280037   | NA         |
| <i>Daphnia</i> | <i>magna</i>   | NA         | NA         | NA          | NA         | JQ280055   | NA         |
| <i>Daphnia</i> | <i>magna</i>   | NA         | NA         | NA          | NA         | JQ280056   | NA         |
| <i>Daphnia</i> | <i>magna</i>   | NA         | NA         | NA          | NA         | JQ280057   | NA         |
| <i>Daphnia</i> | <i>magna</i>   | NA         | NA         | NA          | NA         | JQ280058   | NA         |
| <i>Daphnia</i> | <i>magna</i>   | NA         | NA         | NA          | NA         | JQ280059   | NA         |
| <i>Daphnia</i> | <i>magna</i>   | NA         | NA         | NA          | NA         | JQ280060   | NA         |
| <i>Daphnia</i> | <i>magna</i>   | NA         | NA         | NA          | NA         | JQ280061   | NA         |
| <i>Daphnia</i> | <i>magna</i>   | NA         | NA         | NA          | NA         | JQ280062   | NA         |
| <i>Daphnia</i> | <i>magna</i>   | NA         | NA         | NA          | NA         | JQ280063   | NA         |
| <i>Daphnia</i> | <i>magna</i>   | NA         | NA         | NA          | NA         | JQ280064   | NA         |
| <i>Daphnia</i> | <i>magna</i>   | NA         | NA         | NA          | NA         | JQ280038   | NA         |
| <i>Daphnia</i> | <i>magna</i>   | NA         | NA         | NA          | NA         | JQ280065   | NA         |
| <i>Daphnia</i> | <i>magna</i>   | NA         | NA         | NA          | NA         | JQ280066   | NA         |
| <i>Daphnia</i> | <i>magna</i>   | NA         | NA         | NA          | NA         | JQ280067   | NA         |
| <i>Daphnia</i> | <i>magna</i>   | NA         | NA         | NA          | NA         | JQ280068   | NA         |
| <i>Daphnia</i> | <i>magna</i>   | NA         | NA         | NA          | NA         | JQ280069   | NA         |
| <i>Daphnia</i> | <i>magna</i>   | NA         | NA         | NA          | NA         | JQ280070   | NA         |
| <i>Daphnia</i> | <i>magna</i>   | NA         | NA         | NA          | NA         | JQ280071   | NA         |
| <i>Daphnia</i> | <i>magna</i>   | NA         | NA         | NA          | NA         | JQ280039   | NA         |

|                |                |            |            |             |            |            |            |
|----------------|----------------|------------|------------|-------------|------------|------------|------------|
| <i>Daphnia</i> | <i>magna</i>   | NA         | NA         | NA          | NA         | JQ280040   | NA         |
| <i>Daphnia</i> | <i>magna</i>   | NA         | NA         | NA          | NA         | JQ280041   | NA         |
| <i>Daphnia</i> | <i>magna</i>   | NA         | NA         | NA          | NA         | JQ280042   | NA         |
| <i>Daphnia</i> | <i>magna</i>   | NA         | NA         | NA          | NA         | JQ280043   | NA         |
| <i>Daphnia</i> | <i>magna</i>   | NA         | NA         | NA          | NA         | JQ280044   | NA         |
| <i>Daphnia</i> | <i>magna</i>   | NA         | NA         | NA          | NA         | JQ280072   | NA         |
| <i>Daphnia</i> | <i>magna</i>   | NA         | NA         | NA          | NA         | JQ280081   | NA         |
| <b>Genus</b>   | <b>Species</b> | <b>28s</b> | <b>18s</b> | <b>5.8s</b> | <b>12s</b> | <b>COI</b> | <b>ND2</b> |
| <i>Daphnia</i> | <i>magna</i>   | NA         | NA         | NA          | NA         | JQ280082   | NA         |
| <i>Daphnia</i> | <i>magna</i>   | NA         | NA         | NA          | NA         | JQ280083   | NA         |
| <i>Daphnia</i> | <i>magna</i>   | NA         | NA         | NA          | NA         | JQ280084   | NA         |
| <i>Daphnia</i> | <i>magna</i>   | NA         | NA         | NA          | NA         | JQ280085   | NA         |
| <i>Daphnia</i> | <i>magna</i>   | NA         | NA         | NA          | NA         | JQ280086   | NA         |
| <i>Daphnia</i> | <i>magna</i>   | NA         | NA         | NA          | NA         | JQ280087   | NA         |
| <i>Daphnia</i> | <i>magna</i>   | NA         | NA         | NA          | NA         | JQ280088   | NA         |
| <i>Daphnia</i> | <i>magna</i>   | NA         | NA         | NA          | NA         | JQ280089   | NA         |
| <i>Daphnia</i> | <i>magna</i>   | NA         | NA         | NA          | NA         | JQ280090   | NA         |
| <i>Daphnia</i> | <i>magna</i>   | NA         | NA         | NA          | NA         | JQ280073   | NA         |
| <i>Daphnia</i> | <i>magna</i>   | NA         | NA         | NA          | NA         | JQ280091   | NA         |
| <i>Daphnia</i> | <i>magna</i>   | NA         | NA         | NA          | NA         | JQ280092   | NA         |
| <i>Daphnia</i> | <i>magna</i>   | NA         | NA         | NA          | NA         | JQ280093   | NA         |
| <i>Daphnia</i> | <i>magna</i>   | NA         | NA         | NA          | NA         | JQ280094   | NA         |
| <i>Daphnia</i> | <i>magna</i>   | NA         | NA         | NA          | NA         | JQ280095   | NA         |
| <i>Daphnia</i> | <i>magna</i>   | NA         | NA         | NA          | NA         | JQ280096   | NA         |
| <i>Daphnia</i> | <i>magna</i>   | NA         | NA         | NA          | NA         | JQ280097   | NA         |
| <i>Daphnia</i> | <i>magna</i>   | NA         | NA         | NA          | NA         | JQ280098   | NA         |
| <i>Daphnia</i> | <i>magna</i>   | NA         | NA         | NA          | NA         | JQ280099   | NA         |
| <i>Daphnia</i> | <i>magna</i>   | NA         | NA         | NA          | NA         | JQ280100   | NA         |
| <i>Daphnia</i> | <i>magna</i>   | NA         | NA         | NA          | NA         | JQ280074   | NA         |
| <i>Daphnia</i> | <i>magna</i>   | NA         | NA         | NA          | NA         | JQ280101   | NA         |
| <i>Daphnia</i> | <i>magna</i>   | NA         | NA         | NA          | NA         | JQ280102   | NA         |
| <i>Daphnia</i> | <i>magna</i>   | NA         | NA         | NA          | NA         | JQ280103   | NA         |
| <i>Daphnia</i> | <i>magna</i>   | NA         | NA         | NA          | NA         | JQ280104   | NA         |
| <i>Daphnia</i> | <i>magna</i>   | NA         | NA         | NA          | NA         | JQ280105   | NA         |
| <i>Daphnia</i> | <i>magna</i>   | NA         | NA         | NA          | NA         | JQ280075   | NA         |
| <i>Daphnia</i> | <i>magna</i>   | NA         | NA         | NA          | NA         | JQ280076   | NA         |
| <i>Daphnia</i> | <i>magna</i>   | NA         | NA         | NA          | NA         | JQ280077   | NA         |
| <i>Daphnia</i> | <i>magna</i>   | NA         | NA         | NA          | NA         | JQ280078   | NA         |
| <i>Daphnia</i> | <i>magna</i>   | NA         | NA         | NA          | NA         | JQ280079   | NA         |
| <i>Daphnia</i> | <i>magna</i>   | NA         | NA         | NA          | NA         | JQ280080   | NA         |
| <i>Daphnia</i> | <i>magna</i>   | NA         | NA         | NA          | NA         | LC382444   | NA         |
| <i>Daphnia</i> | <i>magna</i>   | NA         | NA         | NA          | NA         | AF217106   | NA         |
| <i>Daphnia</i> | <i>magna</i>   | NA         | NA         | NA          | NA         | JN233922   | NA         |
| <i>Daphnia</i> | <i>magna</i>   | NA         | NA         | NA          | NA         | GU680596   | NA         |
| <i>Daphnia</i> | <i>magna</i>   | NA         | NA         | NA          | NA         | JN233923   | NA         |
| <i>Daphnia</i> | <i>magna</i>   | NA         | NA         | NA          | NA         | GU680597   | NA         |
| <i>Daphnia</i> | <i>magna</i>   | NA         | NA         | NA          | NA         | JN233924   | NA         |
| <i>Daphnia</i> | <i>magna</i>   | NA         | NA         | NA          | NA         | GU680598   | NA         |
| <i>Daphnia</i> | <i>magna</i>   | NA         | NA         | NA          | NA         | GU680576   | NA         |
| <b>Genus</b>   | <b>Species</b> | <b>28s</b> | <b>18s</b> | <b>5.8s</b> | <b>12s</b> | <b>COI</b> | <b>ND2</b> |
| <i>Daphnia</i> | <i>magna</i>   | NA         | NA         | NA          | NA         | GU680034   | NA         |
| <i>Daphnia</i> | <i>magna</i>   | NA         | NA         | NA          | NA         | KC502300   | NA         |
| <i>Daphnia</i> | <i>magna</i>   | NA         | NA         | NA          | NA         | MG317471   | NA         |
| <i>Daphnia</i> | <i>magna</i>   | NA         | NA         | NA          | NA         | MG317967   | NA         |
| <i>Daphnia</i> | <i>magna</i>   | NA         | NA         | NA          | NA         | MG319046   | NA         |
| <i>Daphnia</i> | <i>magna</i>   | NA         | NA         | NA          | NA         | MG310444   | NA         |
| <i>Daphnia</i> | <i>magna</i>   | NA         | NA         | NA          | NA         | MG313073   | NA         |
| <i>Daphnia</i> | <i>magna</i>   | NA         | NA         | NA          | NA         | KM207106   | NA         |
| <i>Daphnia</i> | <i>magna</i>   | NA         | NA         | NA          | NA         | KY082572   | NA         |
| <i>Daphnia</i> | <i>magna</i>   | NA         | NA         | NA          | NA         | KX168590   | NA         |
| <i>Daphnia</i> | <i>magna</i>   | NA         | NA         | NA          | NA         | KX168591   | NA         |
| <i>Daphnia</i> | <i>magna</i>   | NA         | NA         | NA          | NA         | MF346405   | NA         |
| <i>Daphnia</i> | <i>magna</i>   | NA         | NA         | NA          | NA         | MF346401   | NA         |
| <i>Daphnia</i> | <i>magna</i>   | NA         | NA         | NA          | NA         | MF346403   | NA         |
| <i>Daphnia</i> | <i>magna</i>   | NA         | NA         | NA          | NA         | MF346410   | NA         |

|                |                |            |            |             |            |            |            |
|----------------|----------------|------------|------------|-------------|------------|------------|------------|
| <i>Daphnia</i> | <i>magna</i>   | NA         | NA         | NA          | NA         | MF346408   | NA         |
| <i>Daphnia</i> | <i>magna</i>   | NA         | NA         | NA          | NA         | MF346415   | NA         |
| <i>Daphnia</i> | <i>magna</i>   | NA         | NA         | NA          | NA         | MF346407   | NA         |
| <i>Daphnia</i> | <i>magna</i>   | NA         | NA         | NA          | NA         | MF346413   | NA         |
| <i>Daphnia</i> | <i>magna</i>   | NA         | NA         | NA          | NA         | MF346460   | NA         |
| <i>Daphnia</i> | <i>magna</i>   | NA         | NA         | NA          | NA         | MF346459   | NA         |
| <i>Daphnia</i> | <i>magna</i>   | NA         | NA         | NA          | NA         | MF346435   | NA         |
| <i>Daphnia</i> | <i>magna</i>   | NA         | NA         | NA          | NA         | MF346437   | NA         |
| <i>Daphnia</i> | <i>magna</i>   | NA         | NA         | NA          | NA         | MF346447   | NA         |
| <i>Daphnia</i> | <i>magna</i>   | NA         | NA         | NA          | NA         | MF346411   | NA         |
| <i>Daphnia</i> | <i>magna</i>   | NA         | NA         | NA          | NA         | MF346412   | NA         |
| <i>Daphnia</i> | <i>magna</i>   | NA         | NA         | NA          | NA         | MF346414   | NA         |
| <i>Daphnia</i> | <i>magna</i>   | NA         | NA         | NA          | NA         | MF346438   | NA         |
| <i>Daphnia</i> | <i>magna</i>   | NA         | NA         | NA          | NA         | MF346439   | NA         |
| <i>Daphnia</i> | <i>magna</i>   | NA         | NA         | NA          | NA         | MF346440   | NA         |
| <i>Daphnia</i> | <i>magna</i>   | NA         | NA         | NA          | NA         | MF346441   | NA         |
| <i>Daphnia</i> | <i>magna</i>   | NA         | NA         | NA          | NA         | MF346404   | NA         |
| <i>Daphnia</i> | <i>magna</i>   | NA         | NA         | NA          | NA         | MF346448   | NA         |
| <i>Daphnia</i> | <i>magna</i>   | NA         | NA         | NA          | NA         | MF346402   | NA         |
| <i>Daphnia</i> | <i>magna</i>   | NA         | NA         | NA          | NA         | MF346406   | NA         |
| <i>Daphnia</i> | <i>magna</i>   | NA         | NA         | NA          | NA         | MF346409   | NA         |
| <i>Daphnia</i> | <i>magna</i>   | NA         | NA         | NA          | NA         | MF346416   | NA         |
| <i>Daphnia</i> | <i>magna</i>   | NA         | NA         | NA          | NA         | MF346417   | NA         |
| <i>Daphnia</i> | <i>magna</i>   | NA         | NA         | NA          | NA         | MF346418   | NA         |
| <i>Daphnia</i> | <i>magna</i>   | NA         | NA         | NA          | NA         | MF346419   | NA         |
| <i>Daphnia</i> | <i>magna</i>   | NA         | NA         | NA          | NA         | MF346420   | NA         |
| <b>Genus</b>   | <b>Species</b> | <b>28s</b> | <b>18s</b> | <b>5.8s</b> | <b>12s</b> | <b>COI</b> | <b>ND2</b> |
| <i>Daphnia</i> | <i>magna</i>   | NA         | NA         | NA          | NA         | MF346421   | NA         |
| <i>Daphnia</i> | <i>magna</i>   | NA         | NA         | NA          | NA         | MF346425   | NA         |
| <i>Daphnia</i> | <i>magna</i>   | NA         | NA         | NA          | NA         | MF346426   | NA         |
| <i>Daphnia</i> | <i>magna</i>   | NA         | NA         | NA          | NA         | MF346427   | NA         |
| <i>Daphnia</i> | <i>magna</i>   | NA         | NA         | NA          | NA         | MF346442   | NA         |
| <i>Daphnia</i> | <i>magna</i>   | NA         | NA         | NA          | NA         | MF346443   | NA         |
| <i>Daphnia</i> | <i>magna</i>   | NA         | NA         | NA          | NA         | MF346476   | NA         |
| <i>Daphnia</i> | <i>magna</i>   | NA         | NA         | NA          | NA         | MF346452   | NA         |
| <i>Daphnia</i> | <i>magna</i>   | NA         | NA         | NA          | NA         | MF346445   | NA         |
| <i>Daphnia</i> | <i>magna</i>   | NA         | NA         | NA          | NA         | MF346436   | NA         |
| <i>Daphnia</i> | <i>magna</i>   | NA         | NA         | NA          | NA         | MF346422   | NA         |
| <i>Daphnia</i> | <i>magna</i>   | NA         | NA         | NA          | NA         | MF346456   | NA         |
| <i>Daphnia</i> | <i>magna</i>   | NA         | NA         | NA          | NA         | MF346444   | NA         |
| <i>Daphnia</i> | <i>magna</i>   | NA         | NA         | NA          | NA         | MF346450   | NA         |
| <i>Daphnia</i> | <i>magna</i>   | NA         | NA         | NA          | NA         | MF346451   | NA         |
| <i>Daphnia</i> | <i>magna</i>   | NA         | NA         | NA          | NA         | MF346461   | NA         |
| <i>Daphnia</i> | <i>magna</i>   | NA         | NA         | NA          | NA         | MF346462   | NA         |
| <i>Daphnia</i> | <i>magna</i>   | NA         | NA         | NA          | NA         | MF346446   | NA         |
| <i>Daphnia</i> | <i>magna</i>   | NA         | NA         | NA          | NA         | MF346453   | NA         |
| <i>Daphnia</i> | <i>magna</i>   | NA         | NA         | NA          | NA         | MF346454   | NA         |
| <i>Daphnia</i> | <i>magna</i>   | NA         | NA         | NA          | NA         | MF346463   | NA         |
| <i>Daphnia</i> | <i>magna</i>   | NA         | NA         | NA          | NA         | MF346464   | NA         |
| <i>Daphnia</i> | <i>magna</i>   | NA         | NA         | NA          | NA         | MF346465   | NA         |
| <i>Daphnia</i> | <i>magna</i>   | NA         | NA         | NA          | NA         | MF346466   | NA         |
| <i>Daphnia</i> | <i>magna</i>   | NA         | NA         | NA          | NA         | MF346467   | NA         |
| <i>Daphnia</i> | <i>magna</i>   | NA         | NA         | NA          | NA         | MF346469   | NA         |
| <i>Daphnia</i> | <i>magna</i>   | NA         | NA         | NA          | NA         | MF346470   | NA         |
| <i>Daphnia</i> | <i>magna</i>   | NA         | NA         | NA          | NA         | MF346471   | NA         |
| <i>Daphnia</i> | <i>magna</i>   | NA         | NA         | NA          | NA         | MF346477   | NA         |
| <i>Daphnia</i> | <i>magna</i>   | NA         | NA         | NA          | NA         | MF346449   | NA         |
| <i>Daphnia</i> | <i>magna</i>   | NA         | NA         | NA          | NA         | MF346458   | NA         |
| <i>Daphnia</i> | <i>magna</i>   | NA         | NA         | NA          | NA         | MF346455   | NA         |
| <i>Daphnia</i> | <i>magna</i>   | NA         | NA         | NA          | NA         | MF346468   | NA         |
| <i>Daphnia</i> | <i>magna</i>   | NA         | NA         | NA          | NA         | MF346473   | NA         |
| <i>Daphnia</i> | <i>magna</i>   | NA         | NA         | NA          | NA         | MF346474   | NA         |
| <i>Daphnia</i> | <i>magna</i>   | NA         | NA         | NA          | NA         | MF346457   | NA         |
| <i>Daphnia</i> | <i>magna</i>   | NA         | NA         | NA          | NA         | MF346475   | NA         |
| <i>Daphnia</i> | <i>magna</i>   | NA         | NA         | NA          | NA         | MF346479   | NA         |

| <i>Daphnia</i> | <i>magna</i>           | NA         | NA         | NA          | NA         | MF346472   | NA         |
|----------------|------------------------|------------|------------|-------------|------------|------------|------------|
| <i>Daphnia</i> | <i>magna</i>           | NA         | NA         | NA          | NA         | MF346431   | NA         |
| <i>Daphnia</i> | <i>magna</i>           | NA         | NA         | NA          | NA         | MF346432   | NA         |
| <b>Genus</b>   | <b>Species</b>         | <b>28s</b> | <b>18s</b> | <b>5.8s</b> | <b>12s</b> | <b>COI</b> | <b>ND2</b> |
| <i>Daphnia</i> | <i>magna</i>           | NA         | NA         | NA          | NA         | MF346433   | NA         |
| <i>Daphnia</i> | <i>magna</i>           | NA         | NA         | NA          | NA         | MF346434   | NA         |
| <i>Daphnia</i> | <i>magna</i>           | NA         | NA         | NA          | NA         | MF346429   | NA         |
| <i>Daphnia</i> | <i>magna</i>           | NA         | NA         | NA          | NA         | MF346430   | NA         |
| <i>Daphnia</i> | <i>magna</i>           | NA         | NA         | NA          | NA         | MF346478   | NA         |
| <i>Daphnia</i> | <i>magna</i>           | NA         | NA         | NA          | NA         | MF346428   | NA         |
| <i>Daphnia</i> | <i>magna</i>           | NA         | NA         | NA          | NA         | MF346423   | NA         |
| <i>Daphnia</i> | <i>magna</i>           | NA         | NA         | NA          | NA         | MF346424   | NA         |
| <i>Daphnia</i> | <i>magna</i>           | NA         | NA         | NA          | NA         | JN233921   | NA         |
| <i>Daphnia</i> | <i>magna</i>           | NA         | NA         | NA          | NA         | KC616976   | NA         |
| <i>Daphnia</i> | <i>magna</i>           | NA         | NA         | NA          | NA         | KC616975   | NA         |
| <i>Daphnia</i> | <i>magna</i>           | NA         | NA         | NA          | NA         | KC616972   | NA         |
| <i>Daphnia</i> | <i>magna</i>           | NA         | NA         | NA          | NA         | KC616974   | NA         |
| <i>Daphnia</i> | <i>magna</i>           | NA         | NA         | NA          | NA         | KC616973   | NA         |
| <i>Daphnia</i> | <i>magna</i>           | NA         | NA         | NA          | NA         | EU702133   | NA         |
| <i>Daphnia</i> | <i>magna</i>           | NA         | NA         | NA          | NA         | EU702132   | NA         |
| <i>Daphnia</i> | <i>magna</i>           | NA         | NA         | NA          | NA         | EU702138   | NA         |
| <i>Daphnia</i> | <i>magna</i>           | NA         | NA         | NA          | NA         | EU702137   | NA         |
| <i>Daphnia</i> | <i>magna</i>           | NA         | NA         | NA          | NA         | EU702136   | NA         |
| <i>Daphnia</i> | <i>magna</i>           | NA         | NA         | NA          | NA         | EU702135   | NA         |
| <i>Daphnia</i> | <i>magna</i>           | NA         | NA         | NA          | NA         | EU702134   | NA         |
| <i>Daphnia</i> | <i>mendotae</i>        | NA         | AF277267   | NA          | AF277267   | AY921412   | NA         |
| <i>Daphnia</i> | <i>mendotae</i>        | NA         | NA         | NA          | NA         | GQ475272   | NA         |
| <i>Daphnia</i> | <i>mendotae</i>        | NA         | NA         | NA          | NA         | GQ475273   | NA         |
| <i>Daphnia</i> | <i>mendotae</i>        | NA         | NA         | NA          | NA         | GQ475274   | NA         |
| <i>Daphnia</i> | <i>mendotae</i>        | NA         | NA         | NA          | NA         | MG448996   | NA         |
| <i>Daphnia</i> | <i>mendotae</i>        | NA         | NA         | NA          | NA         | MG449837   | NA         |
| <i>Daphnia</i> | <i>mendotae</i>        | NA         | NA         | NA          | NA         | MG450140   | NA         |
| <i>Daphnia</i> | <i>mendotae</i>        | NA         | NA         | NA          | NA         | MG449766   | NA         |
| <i>Daphnia</i> | <i>mendotae</i>        | NA         | NA         | NA          | NA         | MG449423   | NA         |
| <i>Daphnia</i> | <i>mendotae</i>        | NA         | NA         | NA          | NA         | MG449784   | NA         |
| <i>Daphnia</i> | <i>mendotae</i>        | NA         | NA         | NA          | NA         | MG449874   | NA         |
| <i>Daphnia</i> | <i>mendotae</i>        | NA         | NA         | NA          | NA         | MG450241   | NA         |
| <i>Daphnia</i> | <i>mendotae</i>        | NA         | NA         | NA          | NA         | MG449950   | NA         |
| <i>Daphnia</i> | <i>middendorffiana</i> | NA         | U13909     | NA          | U13909     | FJ427496   | NA         |
| <i>Daphnia</i> | <i>middendorffiana</i> | NA         | NA         | NA          | NA         | KC832000   | NA         |
| <i>Daphnia</i> | <i>middendorffiana</i> | NA         | NA         | NA          | NA         | KC832031   | NA         |
| <i>Daphnia</i> | <i>middendorffiana</i> | NA         | NA         | NA          | NA         | KC832029   | NA         |
| <i>Daphnia</i> | <i>middendorffiana</i> | NA         | NA         | NA          | NA         | KC831999   | NA         |
| <i>Daphnia</i> | <i>middendorffiana</i> | NA         | NA         | NA          | NA         | KC832026   | NA         |
| <i>Daphnia</i> | <i>middendorffiana</i> | NA         | NA         | NA          | NA         | KX024529   | NA         |
| <b>Genus</b>   | <b>Species</b>         | <b>28s</b> | <b>18s</b> | <b>5.8s</b> | <b>12s</b> | <b>COI</b> | <b>ND2</b> |
| <i>Daphnia</i> | <i>middendorffiana</i> | NA         | NA         | NA          | NA         | KX024530   | NA         |
| <i>Daphnia</i> | <i>middendorffiana</i> | NA         | NA         | NA          | NA         | KX024532   | NA         |
| <i>Daphnia</i> | <i>middendorffiana</i> | NA         | NA         | NA          | NA         | KX024528   | NA         |
| <i>Daphnia</i> | <i>middendorffiana</i> | NA         | NA         | NA          | NA         | KX024533   | NA         |
| <i>Daphnia</i> | <i>middendorffiana</i> | NA         | NA         | NA          | NA         | KX024534   | NA         |
| <i>Daphnia</i> | <i>middendorffiana</i> | NA         | NA         | NA          | NA         | KX024535   | NA         |
| <i>Daphnia</i> | <i>middendorffiana</i> | NA         | NA         | NA          | NA         | KX024531   | NA         |
| <i>Daphnia</i> | <i>middendorffiana</i> | NA         | NA         | NA          | NA         | KC832023   | NA         |
| <i>Daphnia</i> | <i>middendorffiana</i> | NA         | NA         | NA          | NA         | KC832001   | NA         |
| <i>Daphnia</i> | <i>middendorffiana</i> | NA         | NA         | NA          | NA         | KC832027   | NA         |
| <i>Daphnia</i> | <i>middendorffiana</i> | NA         | NA         | NA          | NA         | KC502301   | NA         |
| <i>Daphnia</i> | <i>middendorffiana</i> | NA         | NA         | NA          | NA         | JN233899   | NA         |
| <i>Daphnia</i> | <i>middendorffiana</i> | NA         | NA         | NA          | NA         | JN233900   | NA         |
| <i>Daphnia</i> | <i>middendorffiana</i> | NA         | NA         | NA          | NA         | JN233901   | NA         |
| <i>Daphnia</i> | <i>middendorffiana</i> | NA         | NA         | NA          | NA         | JN233902   | NA         |
| <i>Daphnia</i> | <i>middendorffiana</i> | NA         | NA         | NA          | NA         | GU689245   | NA         |
| <i>Daphnia</i> | <i>middendorffiana</i> | NA         | NA         | NA          | NA         | HQ966465   | NA         |
| <i>Daphnia</i> | <i>middendorffiana</i> | NA         | NA         | NA          | NA         | GU680585   | NA         |
| <i>Daphnia</i> | <i>middendorffiana</i> | NA         | NA         | NA          | NA         | GU680130   | NA         |

| <i>Daphnia</i> | <i>middendorffiana</i> | NA       | NA       | NA   | NA       | GU680129 | NA       |
|----------------|------------------------|----------|----------|------|----------|----------|----------|
| <i>Daphnia</i> | <i>obtusa</i>          | AY630611 | KY196429 | NA   | KY196429 | FJ427498 | HM625750 |
| <i>Daphnia</i> | <i>obtusa</i>          | AY630602 | KY196430 | NA   | KY196430 | FJ427499 | NA       |
| <i>Daphnia</i> | <i>obtusa</i>          | AY630612 | KY196427 | NA   | KY196427 | FJ427500 | NA       |
| <i>Daphnia</i> | <i>obtusa</i>          | AY630603 | AY626364 | NA   | AY626364 | FJ427501 | NA       |
| <i>Daphnia</i> | <i>obtusa</i>          | NA       | AY626366 | NA   | AY626366 | FJ427502 | NA       |
| <i>Daphnia</i> | <i>obtusa</i>          | NA       | U13910   | NA   | U13910   | AY380411 | NA       |
| <i>Daphnia</i> | <i>obtusa</i>          | NA       | NA       | NA   | NA       | AY380412 | NA       |
| <i>Daphnia</i> | <i>obtusa</i>          | NA       | NA       | NA   | NA       | AY380413 | NA       |
| <i>Daphnia</i> | <i>obtusa</i>          | NA       | NA       | NA   | NA       | AY380414 | NA       |
| <i>Daphnia</i> | <i>obtusa</i>          | NA       | NA       | NA   | NA       | AY380415 | NA       |
| <i>Daphnia</i> | <i>obtusa</i>          | NA       | NA       | NA   | NA       | AY380416 | NA       |
| <i>Daphnia</i> | <i>obtusa</i>          | NA       | NA       | NA   | NA       | AY380418 | NA       |
| <i>Daphnia</i> | <i>obtusa</i>          | NA       | NA       | NA   | NA       | AY380419 | NA       |
| <i>Daphnia</i> | <i>obtusa</i>          | NA       | NA       | NA   | NA       | AY380417 | NA       |
| <i>Daphnia</i> | <i>obtusa</i>          | NA       | NA       | NA   | NA       | AY380420 | NA       |
| <i>Daphnia</i> | <i>obtusa</i>          | NA       | NA       | NA   | NA       | AY380421 | NA       |
| <i>Daphnia</i> | <i>obtusa</i>          | NA       | NA       | NA   | NA       | AY380422 | NA       |
| <i>Daphnia</i> | <i>obtusa</i>          | NA       | NA       | NA   | NA       | AY380423 | NA       |
| <i>Daphnia</i> | <i>obtusa</i>          | NA       | NA       | NA   | NA       | AY380424 | NA       |
| <i>Daphnia</i> | <i>obtusa</i>          | NA       | NA       | NA   | NA       | AY380425 | NA       |
| <i>Daphnia</i> | <i>obtusa</i>          | NA       | NA       | NA   | NA       | AY380426 | NA       |
| Genus          | Species                | 28s      | 18s      | 5.8s | 12s      | COI      | ND2      |
| <i>Daphnia</i> | <i>obtusa</i>          | NA       | NA       | NA   | NA       | AY380427 | NA       |
| <i>Daphnia</i> | <i>obtusa</i>          | NA       | NA       | NA   | NA       | AY380428 | NA       |
| <i>Daphnia</i> | <i>obtusa</i>          | NA       | NA       | NA   | NA       | AY380429 | NA       |
| <i>Daphnia</i> | <i>obtusa</i>          | NA       | NA       | NA   | NA       | AY380430 | NA       |
| <i>Daphnia</i> | <i>obtusa</i>          | NA       | NA       | NA   | NA       | AY380431 | NA       |
| <i>Daphnia</i> | <i>obtusa</i>          | NA       | NA       | NA   | NA       | AY380432 | NA       |
| <i>Daphnia</i> | <i>obtusa</i>          | NA       | NA       | NA   | NA       | AY380433 | NA       |
| <i>Daphnia</i> | <i>obtusa</i>          | NA       | NA       | NA   | NA       | AY380434 | NA       |
| <i>Daphnia</i> | <i>obtusa</i>          | NA       | NA       | NA   | NA       | AY380435 | NA       |
| <i>Daphnia</i> | <i>obtusa</i>          | NA       | NA       | NA   | NA       | AY380436 | NA       |
| <i>Daphnia</i> | <i>obtusa</i>          | NA       | NA       | NA   | NA       | AY380437 | NA       |
| <i>Daphnia</i> | <i>obtusa</i>          | NA       | NA       | NA   | NA       | AY380438 | NA       |
| <i>Daphnia</i> | <i>obtusa</i>          | NA       | NA       | NA   | NA       | AY380439 | NA       |
| <i>Daphnia</i> | <i>obtusa</i>          | NA       | NA       | NA   | NA       | AY380440 | NA       |
| <i>Daphnia</i> | <i>obtusa</i>          | NA       | NA       | NA   | NA       | AY380441 | NA       |
| <i>Daphnia</i> | <i>obtusa</i>          | NA       | NA       | NA   | NA       | AY380442 | NA       |
| <i>Daphnia</i> | <i>obtusa</i>          | NA       | NA       | NA   | NA       | AY380443 | NA       |
| <i>Daphnia</i> | <i>obtusa</i>          | NA       | NA       | NA   | NA       | AY380445 | NA       |
| <i>Daphnia</i> | <i>obtusa</i>          | NA       | NA       | NA   | NA       | AY380444 | NA       |
| <i>Daphnia</i> | <i>obtusa</i>          | NA       | NA       | NA   | NA       | AY380446 | NA       |
| <i>Daphnia</i> | <i>parvula</i>         | AY630613 | AY626358 | NA   | AY626358 | FJ427504 | NA       |
| <i>Daphnia</i> | <i>parvula</i>         | AY630604 | AF277287 | NA   | AF277287 | AY323126 | NA       |
| <i>Daphnia</i> | <i>parvula</i>         | NA       | AF277286 | NA   | AF277286 | MG936477 | NA       |
| <i>Daphnia</i> | <i>pulex</i>           | DQ470613 | GU595176 | NA   | AY009491 | MG544093 | KF487534 |
| <i>Daphnia</i> | <i>pulex</i>           | AY630618 | GU595177 | NA   | AY745245 | MG544092 | KF487536 |
| <i>Daphnia</i> | <i>pulex</i>           | AY630609 | MH632077 | NA   | AY626352 | JF821195 | KF487537 |
| <i>Daphnia</i> | <i>pulex</i>           | AY630601 | AY009491 | NA   | AF277285 | KJ461677 | KF487535 |
| <i>Daphnia</i> | <i>pulex</i>           | AY630599 | AY745245 | NA   | AY745243 | U29714   | DQ132622 |
| <i>Daphnia</i> | <i>pulex</i>           | FJ176964 | AY626352 | NA   | AF277284 | AY745244 | DQ132626 |
| <i>Daphnia</i> | <i>pulex</i>           | FJ176965 | AF277285 | NA   | EU152311 | KC502305 | NA       |
| <i>Daphnia</i> | <i>pulex</i>           | FJ176966 | AY745243 | NA   | U13902   | KC502308 | NA       |
| <i>Daphnia</i> | <i>pulex</i>           | FJ176967 | AF277284 | NA   | KF214461 | KC502307 | NA       |
| <i>Daphnia</i> | <i>pulex</i>           | FJ176968 | EU152311 | NA   | JN903686 | KC502306 | NA       |
| <i>Daphnia</i> | <i>pulex</i>           | FJ176969 | U13902   | NA   | KF150203 | KC502304 | NA       |
| <i>Daphnia</i> | <i>pulex</i>           | FJ176970 | KF214461 | NA   | KF150204 | KC502303 | NA       |
| <i>Daphnia</i> | <i>pulex</i>           | FJ176971 | JN903686 | NA   | KF150205 | KC502302 | NA       |
| <i>Daphnia</i> | <i>pulex</i>           | FJ176972 | KF150203 | NA   | KF150206 | KC502309 | NA       |
| <i>Daphnia</i> | <i>pulex</i>           | FJ176973 | KF150204 | NA   | DQ235243 | AY380449 | NA       |
| <i>Daphnia</i> | <i>pulex</i>           | FJ176974 | KF150205 | NA   | DQ235244 | KP668800 | NA       |
| <i>Daphnia</i> | <i>pulex</i>           | FJ176975 | KF150206 | NA   | DQ235245 | KP668801 | NA       |
| <i>Daphnia</i> | <i>pulex</i>           | FJ176976 | DQ235243 | NA   | KF150207 | KP668802 | NA       |
| Genus          | Species                | 28s      | 18s      | 5.8s | 12s      | COI      | ND2      |

|                |                |            |            |             |            |            |            |
|----------------|----------------|------------|------------|-------------|------------|------------|------------|
| <i>Daphnia</i> | <i>pulex</i>   | FJ176977   | DQ235244   | NA          | KF150208   | KP668803   | NA         |
| <i>Daphnia</i> | <i>pulex</i>   | FJ176978   | DQ235245   | NA          | AY626356   | KP668804   | NA         |
| <i>Daphnia</i> | <i>pulex</i>   | FJ176979   | KF150207   | NA          | AY626357   | KP668805   | NA         |
| <i>Daphnia</i> | <i>pulex</i>   | FJ176980   | KF150208   | NA          | KF150209   | KP668806   | NA         |
| <i>Daphnia</i> | <i>pulex</i>   | FJ176981   | AY626356   | NA          | KF150210   | KP668807   | NA         |
| <i>Daphnia</i> | <i>pulex</i>   | FJ176982   | AY626357   | NA          | KY196422   | KP668808   | NA         |
| <i>Daphnia</i> | <i>pulex</i>   | FJ176983   | KF150209   | NA          | JN903685   | KP668809   | NA         |
| <i>Daphnia</i> | <i>pulex</i>   | FJ176984   | KF150210   | NA          | KF150211   | KP668810   | NA         |
| <i>Daphnia</i> | <i>pulex</i>   | FJ176985   | KY196422   | NA          | KF150212   | EU152320   | NA         |
| <i>Daphnia</i> | <i>pulex</i>   | FJ176986   | JN903685   | NA          | AB872283   | EU152321   | NA         |
| <i>Daphnia</i> | <i>pulex</i>   | FJ176987   | KF150211   | NA          | AB872284   | KF993363   | NA         |
| <i>Daphnia</i> | <i>pulex</i>   | FJ176988   | KF150212   | NA          | AB872285   | KF993371   | NA         |
| <i>Daphnia</i> | <i>pulex</i>   | FJ176989   | AB872283   | NA          | AB872286   | KF993364   | NA         |
| <i>Daphnia</i> | <i>pulex</i>   | FJ176990   | AB872284   | NA          | AB872287   | KF993372   | NA         |
| <i>Daphnia</i> | <i>pulex</i>   | FJ176991   | AB872285   | NA          | AB872288   | KT963307   | NA         |
| <i>Daphnia</i> | <i>pulex</i>   | FJ176992   | AB872286   | NA          | LC389173   | GQ466410   | NA         |
| <i>Daphnia</i> | <i>pulex</i>   | FJ176993   | AB872287   | NA          | JX150982   | GQ475277   | NA         |
| <i>Daphnia</i> | <i>pulex</i>   | FJ176994   | AB872288   | NA          | JX150981   | LC389174   | NA         |
| <i>Daphnia</i> | <i>pulex</i>   | FJ176995   | LC389173   | NA          | JX150980   | LC215468   | NA         |
| <i>Daphnia</i> | <i>pulex</i>   | FJ176996   | KT003819   | NA          | GU595176   | LC215467   | NA         |
| <i>Daphnia</i> | <i>pulex</i>   | FJ176997   | JX150982   | NA          | GU595177   | LC002268   | NA         |
| <i>Daphnia</i> | <i>pulex</i>   | FJ176998   | JX150981   | NA          | MH632077   | LC002269   | NA         |
| <i>Daphnia</i> | <i>pulex</i>   | FJ176999   | JX150980   | NA          | JX150979   | LC099002   | NA         |
| <i>Daphnia</i> | <i>pulex</i>   | FJ177015   | JX150979   | NA          | NA         | LC002270   | NA         |
| <i>Daphnia</i> | <i>pulex</i>   | FJ177000   | NA         | NA          | NA         | LC002271   | NA         |
| <i>Daphnia</i> | <i>pulex</i>   | FJ177001   | NA         | NA          | NA         | AB872295   | NA         |
| <i>Daphnia</i> | <i>pulex</i>   | FJ177002   | NA         | NA          | NA         | AB872296   | NA         |
| <i>Daphnia</i> | <i>pulex</i>   | FJ177003   | NA         | NA          | NA         | AB872297   | NA         |
| <i>Daphnia</i> | <i>pulex</i>   | FJ177004   | NA         | NA          | NA         | AB872298   | NA         |
| <i>Daphnia</i> | <i>pulex</i>   | FJ177005   | NA         | NA          | NA         | AB872299   | NA         |
| <i>Daphnia</i> | <i>pulex</i>   | FJ177006   | NA         | NA          | NA         | AB872300   | NA         |
| <i>Daphnia</i> | <i>pulex</i>   | FJ177007   | NA         | NA          | NA         | MG315907   | NA         |
| <i>Daphnia</i> | <i>pulex</i>   | FJ177008   | NA         | NA          | NA         | MG317094   | NA         |
| <i>Daphnia</i> | <i>pulex</i>   | FJ177009   | NA         | NA          | NA         | MG316013   | NA         |
| <i>Daphnia</i> | <i>pulex</i>   | FJ177010   | NA         | NA          | NA         | MG936593   | NA         |
| <i>Daphnia</i> | <i>pulex</i>   | FJ177011   | NA         | NA          | NA         | MG936255   | NA         |
| <i>Daphnia</i> | <i>pulex</i>   | FJ177012   | NA         | NA          | NA         | HM622593   | NA         |
| <i>Daphnia</i> | <i>pulex</i>   | FJ177013   | NA         | NA          | NA         | HM622592   | NA         |
| <i>Daphnia</i> | <i>pulex</i>   | FJ177014   | NA         | NA          | NA         | HM622591   | NA         |
| <i>Daphnia</i> | <i>pulex</i>   | NA         | NA         | NA          | NA         | HM622590   | NA         |
| <i>Daphnia</i> | <i>pulex</i>   | NA         | NA         | NA          | NA         | JX150978   | NA         |
| <b>Genus</b>   | <b>Species</b> | <b>28s</b> | <b>18s</b> | <b>5.8s</b> | <b>12s</b> | <b>COI</b> | <b>ND2</b> |
| <i>Daphnia</i> | <i>pulex</i>   | NA         | NA         | NA          | NA         | JX150977   | NA         |
| <i>Daphnia</i> | <i>pulex</i>   | NA         | NA         | NA          | NA         | JX150976   | NA         |
| <i>Daphnia</i> | <i>pulex</i>   | NA         | NA         | NA          | NA         | KU720108   | NA         |
| <i>Daphnia</i> | <i>pulex</i>   | NA         | NA         | NA          | NA         | KC616923   | NA         |
| <i>Daphnia</i> | <i>pulex</i>   | NA         | NA         | NA          | NA         | KC616922   | NA         |
| <i>Daphnia</i> | <i>pulex</i>   | NA         | NA         | NA          | NA         | KC616924   | NA         |
| <i>Daphnia</i> | <i>pulex</i>   | NA         | NA         | NA          | NA         | HQ972025   | NA         |
| <i>Daphnia</i> | <i>pulex</i>   | NA         | NA         | NA          | NA         | GU680590   | NA         |
| <i>Daphnia</i> | <i>pulex</i>   | NA         | NA         | NA          | NA         | GU680591   | NA         |
| <i>Daphnia</i> | <i>pulex</i>   | NA         | NA         | NA          | NA         | GU689239   | NA         |
| <i>Daphnia</i> | <i>pulex</i>   | NA         | NA         | NA          | NA         | GU689243   | NA         |
| <i>Daphnia</i> | <i>pulex</i>   | NA         | NA         | NA          | NA         | GU689241   | NA         |
| <i>Daphnia</i> | <i>pulex</i>   | NA         | NA         | NA          | NA         | GU689240   | NA         |
| <i>Daphnia</i> | <i>pulex</i>   | NA         | NA         | NA          | NA         | GU689237   | NA         |
| <i>Daphnia</i> | <i>pulex</i>   | NA         | NA         | NA          | NA         | GU689242   | NA         |
| <i>Daphnia</i> | <i>pulex</i>   | NA         | NA         | NA          | NA         | GU689238   | NA         |
| <i>Daphnia</i> | <i>pulex</i>   | NA         | NA         | NA          | NA         | GU680589   | NA         |
| <i>Daphnia</i> | <i>pulex</i>   | NA         | NA         | NA          | NA         | GU680588   | NA         |
| <i>Daphnia</i> | <i>pulex</i>   | NA         | NA         | NA          | NA         | GU680584   | NA         |
| <i>Daphnia</i> | <i>pulex</i>   | NA         | NA         | NA          | NA         | GU680582   | NA         |
| <i>Daphnia</i> | <i>pulex</i>   | NA         | NA         | NA          | NA         | GU680580   | NA         |
| <i>Daphnia</i> | <i>pulex</i>   | NA         | NA         | NA          | NA         | GU680581   | NA         |
| <i>Daphnia</i> | <i>pulex</i>   | NA         | NA         | NA          | NA         | GU680577   | NA         |

|                |                  |            |            |             |            |            |            |
|----------------|------------------|------------|------------|-------------|------------|------------|------------|
| <i>Daphnia</i> | <i>pulex</i>     | NA         | NA         | NA          | NA         | GU680575   | NA         |
| <i>Daphnia</i> | <i>pulex</i>     | NA         | NA         | NA          | NA         | GU680572   | NA         |
| <i>Daphnia</i> | <i>pulex</i>     | NA         | NA         | NA          | NA         | GU680573   | NA         |
| <i>Daphnia</i> | <i>pulex</i>     | NA         | NA         | NA          | NA         | GU680040   | NA         |
| <i>Daphnia</i> | <i>pulex</i>     | NA         | NA         | NA          | NA         | GU680036   | NA         |
| <i>Daphnia</i> | <i>pulex</i>     | NA         | NA         | NA          | NA         | GU680028   | NA         |
| <i>Daphnia</i> | <i>pulex</i>     | NA         | NA         | NA          | NA         | GU680024   | NA         |
| <i>Daphnia</i> | <i>pulex</i>     | NA         | NA         | NA          | NA         | KC617601   | NA         |
| <i>Daphnia</i> | <i>pulex</i>     | NA         | NA         | NA          | NA         | KC617602   | NA         |
| <i>Daphnia</i> | <i>pulex</i>     | NA         | NA         | NA          | NA         | KC617603   | NA         |
| <i>Daphnia</i> | <i>pulex</i>     | NA         | NA         | NA          | NA         | JN233908   | NA         |
| <i>Daphnia</i> | <i>pulex</i>     | NA         | NA         | NA          | NA         | JN233909   | NA         |
| <i>Daphnia</i> | <i>pulex</i>     | NA         | NA         | NA          | NA         | JN233910   | NA         |
| <i>Daphnia</i> | <i>pulex</i>     | NA         | NA         | NA          | NA         | JN233911   | NA         |
| <i>Daphnia</i> | <i>pulex</i>     | NA         | NA         | NA          | NA         | JN233912   | NA         |
| <i>Daphnia</i> | <i>pulex</i>     | NA         | NA         | NA          | NA         | JN233913   | NA         |
| <i>Daphnia</i> | <i>pulex</i>     | NA         | NA         | NA          | NA         | JN233914   | NA         |
| <i>Daphnia</i> | <i>pulex</i>     | NA         | NA         | NA          | NA         | JN233915   | NA         |
| <b>Genus</b>   | <b>Species</b>   | <b>28s</b> | <b>18s</b> | <b>5.8s</b> | <b>12s</b> | <b>COI</b> | <b>ND2</b> |
| <i>Daphnia</i> | <i>pulex</i>     | NA         | NA         | NA          | NA         | JN233916   | NA         |
| <i>Daphnia</i> | <i>pulex</i>     | NA         | NA         | NA          | NA         | JN233917   | NA         |
| <i>Daphnia</i> | <i>pulex</i>     | NA         | NA         | NA          | NA         | JN233918   | NA         |
| <i>Daphnia</i> | <i>pulex</i>     | NA         | NA         | NA          | NA         | JN233919   | NA         |
| <i>Daphnia</i> | <i>pulex</i>     | NA         | NA         | NA          | NA         | JN233920   | NA         |
| <i>Daphnia</i> | <i>pulex</i>     | NA         | NA         | NA          | NA         | JN233907   | NA         |
| <i>Daphnia</i> | <i>pulex</i>     | NA         | NA         | NA          | NA         | JN233906   | NA         |
| <i>Daphnia</i> | <i>pulex</i>     | NA         | NA         | NA          | NA         | JN233905   | NA         |
| <i>Daphnia</i> | <i>pulex</i>     | NA         | NA         | NA          | NA         | JN233903   | NA         |
| <i>Daphnia</i> | <i>pulex</i>     | NA         | NA         | NA          | NA         | JN233904   | NA         |
| <i>Daphnia</i> | <i>pulex</i>     | NA         | NA         | NA          | NA         | MH632100   | NA         |
| <i>Daphnia</i> | <i>pulicaria</i> | NA         | EU152318   | NA          | AY626354   | MG544059   | KF487539   |
| <i>Daphnia</i> | <i>pulicaria</i> | NA         | EU152313   | NA          | AY626355   | MG544060   | KF487538   |
| <i>Daphnia</i> | <i>pulicaria</i> | NA         | EU152314   | NA          | EU152319   | MG544061   | DQ132623   |
| <i>Daphnia</i> | <i>pulicaria</i> | NA         | EU152315   | NA          | U13905     | MG544086   | DQ845275   |
| <i>Daphnia</i> | <i>pulicaria</i> | NA         | EU152316   | NA          | EU152318   | MG544087   | NA         |
| <i>Daphnia</i> | <i>pulicaria</i> | NA         | EU152317   | NA          | EU152313   | MG544088   | NA         |
| <i>Daphnia</i> | <i>pulicaria</i> | NA         | EU152312   | NA          | EU152314   | AF489525   | NA         |
| <i>Daphnia</i> | <i>pulicaria</i> | NA         | MH632078   | NA          | EU152315   | AF489524   | NA         |
| <i>Daphnia</i> | <i>pulicaria</i> | NA         | AY626354   | NA          | EU152316   | AF489523   | NA         |
| <i>Daphnia</i> | <i>pulicaria</i> | NA         | AY626355   | NA          | EU152317   | KC832033   | NA         |
| <i>Daphnia</i> | <i>pulicaria</i> | NA         | EU152319   | NA          | EU152312   | KC832004   | NA         |
| <i>Daphnia</i> | <i>pulicaria</i> | NA         | MH632072   | NA          | MH632078   | KC832032   | NA         |
| <i>Daphnia</i> | <i>pulicaria</i> | NA         | U13905     | NA          | NA         | KC832030   | NA         |
| <i>Daphnia</i> | <i>pulicaria</i> | NA         | NA         | NA          | NA         | KC832011   | NA         |
| <i>Daphnia</i> | <i>pulicaria</i> | NA         | NA         | NA          | NA         | KC832024   | NA         |
| <i>Daphnia</i> | <i>pulicaria</i> | NA         | NA         | NA          | NA         | MH632096   | NA         |
| <i>Daphnia</i> | <i>pulicaria</i> | NA         | NA         | NA          | NA         | KC832003   | NA         |
| <i>Daphnia</i> | <i>pulicaria</i> | NA         | NA         | NA          | NA         | KX024545   | NA         |
| <i>Daphnia</i> | <i>pulicaria</i> | NA         | NA         | NA          | NA         | KX024553   | NA         |
| <i>Daphnia</i> | <i>pulicaria</i> | NA         | NA         | NA          | NA         | KX024554   | NA         |
| <i>Daphnia</i> | <i>pulicaria</i> | NA         | NA         | NA          | NA         | KX024555   | NA         |
| <i>Daphnia</i> | <i>pulicaria</i> | NA         | NA         | NA          | NA         | KX024562   | NA         |
| <i>Daphnia</i> | <i>pulicaria</i> | NA         | NA         | NA          | NA         | KX024563   | NA         |
| <i>Daphnia</i> | <i>pulicaria</i> | NA         | NA         | NA          | NA         | KX024564   | NA         |
| <i>Daphnia</i> | <i>pulicaria</i> | NA         | NA         | NA          | NA         | KX024546   | NA         |
| <i>Daphnia</i> | <i>pulicaria</i> | NA         | NA         | NA          | NA         | KX024559   | NA         |
| <i>Daphnia</i> | <i>pulicaria</i> | NA         | NA         | NA          | NA         | KX024558   | NA         |
| <i>Daphnia</i> | <i>pulicaria</i> | NA         | NA         | NA          | NA         | KX024536   | NA         |
| <i>Daphnia</i> | <i>pulicaria</i> | NA         | NA         | NA          | NA         | KX024560   | NA         |
| <i>Daphnia</i> | <i>pulicaria</i> | NA         | NA         | NA          | NA         | KX024537   | NA         |
| <b>Genus</b>   | <b>Species</b>   | <b>28s</b> | <b>18s</b> | <b>5.8s</b> | <b>12s</b> | <b>COI</b> | <b>ND2</b> |
| <i>Daphnia</i> | <i>pulicaria</i> | NA         | NA         | NA          | NA         | KX024538   | NA         |
| <i>Daphnia</i> | <i>pulicaria</i> | NA         | NA         | NA          | NA         | KX024541   | NA         |
| <i>Daphnia</i> | <i>pulicaria</i> | NA         | NA         | NA          | NA         | KX024542   | NA         |
| <i>Daphnia</i> | <i>pulicaria</i> | NA         | NA         | NA          | NA         | KX024561   | NA         |

|                     |                  |    |          |    |          |          |    |
|---------------------|------------------|----|----------|----|----------|----------|----|
| <i>Daphnia</i>      | <i>pulicaria</i> | NA | NA       | NA | NA       | KX024543 | NA |
| <i>Daphnia</i>      | <i>pulicaria</i> | NA | NA       | NA | NA       | KX024540 | NA |
| <i>Daphnia</i>      | <i>pulicaria</i> | NA | NA       | NA | NA       | KX024557 | NA |
| <i>Daphnia</i>      | <i>pulicaria</i> | NA | NA       | NA | NA       | KX024550 | NA |
| <i>Daphnia</i>      | <i>pulicaria</i> | NA | NA       | NA | NA       | KX024552 | NA |
| <i>Daphnia</i>      | <i>pulicaria</i> | NA | NA       | NA | NA       | KX024539 | NA |
| <i>Daphnia</i>      | <i>pulicaria</i> | NA | NA       | NA | NA       | KX024556 | NA |
| <i>Daphnia</i>      | <i>pulicaria</i> | NA | NA       | NA | NA       | KX024551 | NA |
| <i>Daphnia</i>      | <i>pulicaria</i> | NA | NA       | NA | NA       | KX024565 | NA |
| <i>Daphnia</i>      | <i>pulicaria</i> | NA | NA       | NA | NA       | KX024548 | NA |
| <i>Daphnia</i>      | <i>pulicaria</i> | NA | NA       | NA | NA       | KX024549 | NA |
| <i>Daphnia</i>      | <i>pulicaria</i> | NA | NA       | NA | NA       | KX024544 | NA |
| <i>Daphnia</i>      | <i>pulicaria</i> | NA | NA       | NA | NA       | KX024547 | NA |
| <i>Daphnia</i>      | <i>pulicaria</i> | NA | NA       | NA | NA       | KC832025 | NA |
| <i>Daphnia</i>      | <i>pulicaria</i> | NA | NA       | NA | NA       | KC832028 | NA |
| <i>Daphnia</i>      | <i>pulicaria</i> | NA | NA       | NA | NA       | JN233925 | NA |
| <i>Daphnia</i>      | <i>pulicaria</i> | NA | NA       | NA | NA       | EU152329 | NA |
| <i>Daphnia</i>      | <i>pulicaria</i> | NA | NA       | NA | NA       | EU152328 | NA |
| <i>Daphnia</i>      | <i>pulicaria</i> | NA | NA       | NA | NA       | EU152324 | NA |
| <i>Daphnia</i>      | <i>pulicaria</i> | NA | NA       | NA | NA       | EU152323 | NA |
| <i>Daphnia</i>      | <i>pulicaria</i> | NA | NA       | NA | NA       | EU152325 | NA |
| <i>Daphnia</i>      | <i>pulicaria</i> | NA | NA       | NA | NA       | EU152326 | NA |
| <i>Daphnia</i>      | <i>pulicaria</i> | NA | NA       | NA | NA       | EU152327 | NA |
| <i>Daphnia</i>      | <i>pulicaria</i> | NA | NA       | NA | NA       | EU152322 | NA |
| <i>Daphnia</i>      | <i>pulicaria</i> | NA | NA       | NA | NA       | EU152330 | NA |
| <i>Daphnia</i>      | <i>pulicaria</i> | NA | NA       | NA | NA       | FJ427505 | NA |
| <i>Daphnia</i>      | <i>pulicaria</i> | NA | NA       | NA | NA       | MH632101 | NA |
| <i>Simocephalus</i> | sp               | NA | JN903692 | NA | JN903692 | LC382446 | NA |
| <i>Simocephalus</i> | sp               | NA | JQ861684 | NA | JQ861684 | NA       | NA |
| <i>Simocephalus</i> | sp               | NA | JQ861685 | NA | JQ861685 | NA       | NA |

**Table S3: Species-specific coefficients from population-level ordinary least squares (OLS) regressions comparing life history reaction norms and climate variables.**

| Species                        | Life History Trait |          |             |                      |                        |                      |          |
|--------------------------------|--------------------|----------|-------------|----------------------|------------------------|----------------------|----------|
|                                | AFR                | SFR      | Clutch Size | Juvenile Growth Rate | Population Growth Rate | Interclutch Interval | Lifespan |
| <i>Daphnia ambigua</i>         | ...                | -.583*** | ...         | ...                  | ...                    | 19.8*                | ...      |
| <i>Daphnia carinata</i>        | -10.2              | -4.45*** | 10.6*       | ...                  | -.542                  | -14.3                | 76.7     |
| <i>Daphnia catawba</i>         | 3.59               | .231     | -7.68**     | ...                  | ...                    | ...                  | ...      |
| <i>Daphnia cucullata</i>       | -.037              | .088     | 2.07        | ...                  | .524                   | ...                  | ...      |
| <i>Daphnia curvirostris</i>    | ...                | ...      | -.423       | 1.07***              | ...                    | ...                  | ...      |
| <i>Daphnia galeata</i>         | 1.10               | .349*    | -.107       | -.501***             | .218                   | ...                  | ...      |
| <i>Daphnia gessneri</i>        | -4.74              | ...      | ...         | ...                  | ...                    | -33.0*               | ...      |
| <i>Daphnia longispina</i>      | 1.81               | .120     | .173        | -.473                | .177                   | ...                  | ...      |
| <i>Daphnia lumholtzi</i>       | 1.81               | -1.06*** | -8.35***    | ...                  | -1.03*                 | 15.3*                | 2.30     |
| <i>Daphnia magna</i>           | 2.26               | 1.91***  | 7.47        | -.101                | 1.46***                | ...                  | -20.4    |
| <i>Daphnia mendotae</i>        | ...                | .188     | .323        | ...                  | ...                    | ...                  | ...      |
| <i>Daphnia middendorffiana</i> | 2.72               | 1.09***  | -.657       | ...                  | ...                    | ...                  | ...      |
| <i>Daphnia obtusa</i>          | ...                | .654*    | ...         | .305                 | ...                    | ...                  | ...      |
| <i>Daphnia parvula</i>         | -.970              | ...      | -8.62**     | ...                  | -.774                  | ...                  | ...      |
| <i>Daphnia pulex</i>           | .652               | 1.30***  | -1.08       | .333*                | ...                    | ...                  | ...      |
| <i>Daphnia pulicaria</i>       | ...                | .598**   | ...         | .013                 | ...                    | ...                  | ...      |

\* $P < .05$

\*\* $P < .01$

\*\*\* $P < .001$

**Table S4: Phylogenetic independent contrast (PIC) pairwise trait comparisons. Top right (white) values represent number of species (*N*) included in the PIC. Lower left (gray) values represent p-values for each pairwise PIC comparison. \* indicates  $P < 0.05$ ; † indicates  $P < 0.10$ . Graphical representations can be found in Supplemental Figure 1.**

| Life History Trait<br>(LHT) | Age at First<br>Reproducti<br>on<br>(AFR) | Size at First<br>Reproducti<br>on<br>(SFR) | Clutch Size<br>(CS) | Growth<br>Rate<br>(GR) | Population<br>Growth<br>Rate<br>(PGR) | Size at<br>Death<br>(SD) | Interclutch<br>Interval<br>(II) | Lifespan<br>(LS) |
|-----------------------------|-------------------------------------------|--------------------------------------------|---------------------|------------------------|---------------------------------------|--------------------------|---------------------------------|------------------|
| AFR                         | -                                         | 8                                          | 8                   | 4                      | 8                                     | 3                        | 4                               | 4                |
| SFR                         | 0.6238                                    | -                                          | 10                  | 4                      | 7                                     | 3                        | 3                               | 4                |
| CS                          | 0.07276 <sup>†</sup>                      | 0.3305                                     | -                   | 6                      | 6                                     | 3                        | 4                               | 5                |
| GR                          | 0.6916                                    | 0.5374                                     | 0.2639              | -                      | 4                                     | 3                        | 2                               | 2                |
| PGR                         | 0.8858                                    | 0.2377                                     | 0.3881              | 0.9708                 | -                                     | 4                        | 4                               | 4                |
| SD                          | 0.7645                                    | 0.04906*                                   | 0.9545              | 0.02878*               | 0.4148                                | -                        | 2                               | 2                |
| II                          | 0.7823                                    | 0.4583                                     | 0.6179              | NA                     | 0.001366*                             | NA                       | -                               | 4                |
| LS                          | 0.3123                                    | 0.2354                                     | 0.832               | NA                     | 0.1538                                | NA                       | 0.1545                          | -                |

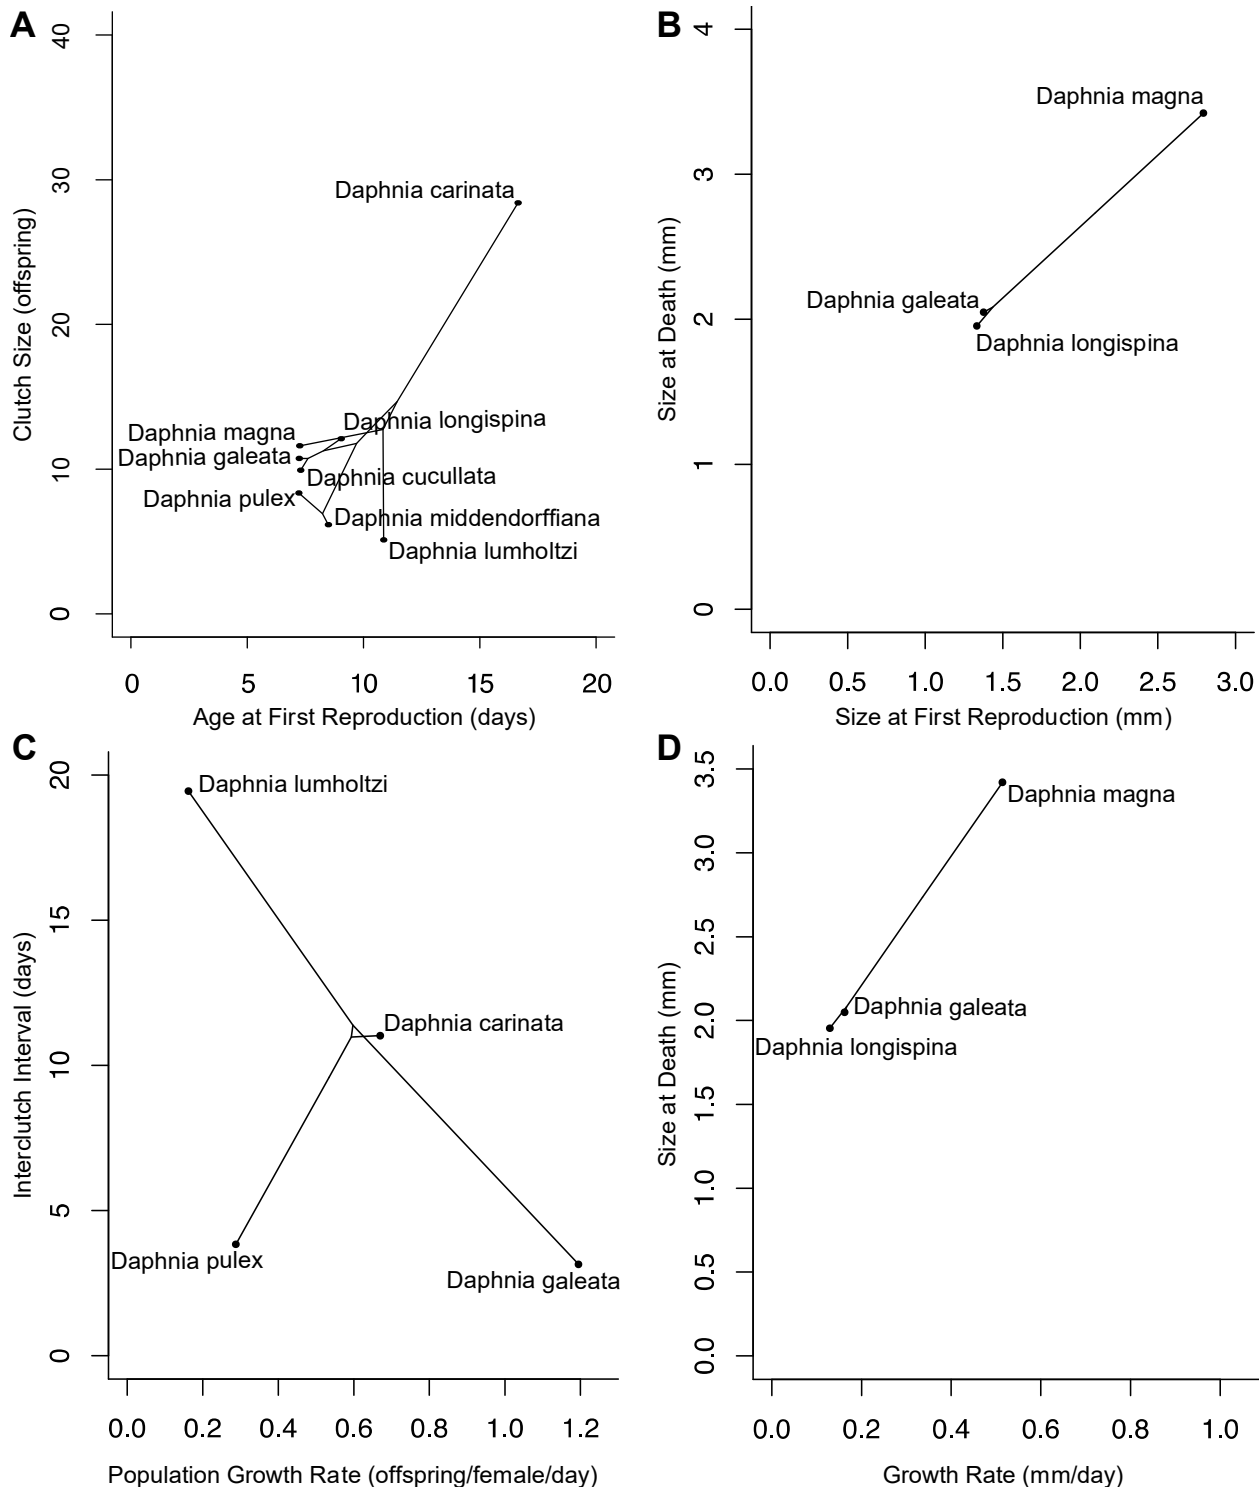

**Figure S1: Phylogenetic Independent Contrasts (PICs) of marginally significant ( $P < 0.10$ ; A) and significant ( $P < 0.05$ ; B-D) pairwise life history trait comparisons. Each point represents a different species (as labelled) in the comparison. P-values can be found in Table S4. Lines represent phylogenetic relationships among species.**
